# Supplementary material for: intansv: an R package for integrative analysis of structural variations
Source: PeerJ. 2020 Apr 28;8:e8867. doi: 10.7717/peerj.8867 (PMC7194084; doi:10.7717/peerj.8867)
Supplement: Table S1 — Chromosome, the chromosome ID of a SV. Pos1, the start coordinate of a SV. Pos2, the end coordinate of a SV. info, Information on a SV reported by different SV callers. tag, tag of a genomic element. start, start coordinate of a genomic element. end, end coordinate of a genomic element. strand, strand of a genomic element. ID, ID of a genomic element. [file peerj-08-8867-s001.xlsx]

## Sheet: Deletion
Table S1. Integrative analysis of deletions based on the NGS data of a rice variety Zhenshan 97 using the R package intansv. Chromosome, the chromosome ID of a SV. Pos1, the start coordinate of a SV. Pos2, the end coordinate of a SV. info, Information on a SV reported by different SV callers. tag, tag of a genomic element. start, start coordinate of a genomic element. end, end coordinate of a gen…
chromosome	pos1	pos2	methods	info	tag	start	end	strand	ID
chr01	54574	57844	BreakDancer:Pindel:DELLY	score=99;PE=6:SR=4;score=8:PE=6;SR=0	gene	57082	57972	+	LOC_Os01g01110
chr01	54574	57844	BreakDancer:Pindel:DELLY	score=99;PE=6:SR=4;score=8:PE=6;SR=0	mRNA	57082	57972	+	LOC_Os01g01110.1
chr01	54574	57844	BreakDancer:Pindel:DELLY	score=99;PE=6:SR=4;score=8:PE=6;SR=0	exon	57082	57972	+	LOC_Os01g01110.1:exon_1
chr01	54574	57844	BreakDancer:Pindel:DELLY	score=99;PE=6:SR=4;score=8:PE=6;SR=0	five_prime_UTR	57082	57156	+	LOC_Os01g01110.1:utr_1
chr01	54574	57844	BreakDancer:Pindel:DELLY	score=99;PE=6:SR=4;score=8:PE=6;SR=0	CDS	57157	57972	+	LOC_Os01g01110.1:cds_1
chr01	81984	82220	BreakDancer:Pindel	score=99;PE=12:SR=3;score=4	NA	NA	NA	NA	NA
chr01	180663	181090	BreakDancer:Pindel:DELLY	score=99;PE=18:SR=3;score=6:PE=16;SR=0	gene	178310	180812	+	LOC_Os01g01360
chr01	180663	181090	BreakDancer:Pindel:DELLY	score=99;PE=18:SR=3;score=6:PE=16;SR=0	mRNA	178310	180812	+	LOC_Os01g01360.1
chr01	180663	181090	BreakDancer:Pindel:DELLY	score=99;PE=18:SR=3;score=6:PE=16;SR=0	exon	178310	180812	+	LOC_Os01g01360.1:exon_1
chr01	180663	181090	BreakDancer:Pindel:DELLY	score=99;PE=18:SR=3;score=6:PE=16;SR=0	three_prime_UTR	180463	180812	+	LOC_Os01g01360.1:utr_2
chr01	191192	191856	BreakDancer:DELLY	score=99;PE=7:PE=8;SR=0	gene	191036	196287	+	LOC_Os01g01380
chr01	191192	191856	BreakDancer:DELLY	score=99;PE=7:PE=8;SR=0	mRNA	191036	196287	+	LOC_Os01g01380.1
chr01	191192	191856	BreakDancer:DELLY	score=99;PE=7:PE=8;SR=0	exon	191625	191705	+	LOC_Os01g01380.1:exon_2
chr01	191192	191856	BreakDancer:DELLY	score=99;PE=7:PE=8;SR=0	five_prime_UTR	191625	191705	+	LOC_Os01g01380.1:utr_2
chr01	238795	239175	Pindel:DELLY	SR=4;score=8:PE=4;SR=0	NA	NA	NA	NA	NA
chr01	275624	282415	BreakDancer:DELLY:Lumpy	score=99;PE=8:PE=7;SR=0:SU=5	gene	276285	277881	-	LOC_Os01g01530
chr01	275624	282415	BreakDancer:DELLY:Lumpy	score=99;PE=8:PE=7;SR=0:SU=5	exon	277752	277881	-	LOC_Os01g01530.1:exon_1
chr01	275624	282415	BreakDancer:DELLY:Lumpy	score=99;PE=8:PE=7;SR=0:SU=5	CDS	276930	277663	-	LOC_Os01g01530.1:cds_2
chr01	275624	282415	BreakDancer:DELLY:Lumpy	score=99;PE=8:PE=7;SR=0:SU=5	mRNA	276285	277881	-	LOC_Os01g01530.1
chr01	275624	282415	BreakDancer:DELLY:Lumpy	score=99;PE=8:PE=7;SR=0:SU=5	CDS	281151	281807	-	LOC_Os01g01550.1:cds_3
chr01	275624	282415	BreakDancer:DELLY:Lumpy	score=99;PE=8:PE=7;SR=0:SU=5	CDS	277752	277881	-	LOC_Os01g01530.1:cds_1
chr01	275624	282415	BreakDancer:DELLY:Lumpy	score=99;PE=8:PE=7;SR=0:SU=5	CDS	280846	280909	-	LOC_Os01g01550.1:cds_5
chr01	275624	282415	BreakDancer:DELLY:Lumpy	score=99;PE=8:PE=7;SR=0:SU=5	exon	276930	277663	-	LOC_Os01g01530.1:exon_2
chr01	275624	282415	BreakDancer:DELLY:Lumpy	score=99;PE=8:PE=7;SR=0:SU=5	exon	276390	276851	-	LOC_Os01g01530.1:exon_3
chr01	275624	282415	BreakDancer:DELLY:Lumpy	score=99;PE=8:PE=7;SR=0:SU=5	gene	279982	280494	+	LOC_Os01g01540
chr01	275624	282415	BreakDancer:DELLY:Lumpy	score=99;PE=8:PE=7;SR=0:SU=5	mRNA	279982	280494	+	LOC_Os01g01540.1
chr01	275624	282415	BreakDancer:DELLY:Lumpy	score=99;PE=8:PE=7;SR=0:SU=5	exon	276285	276308	-	LOC_Os01g01530.1:exon_4
chr01	275624	282415	BreakDancer:DELLY:Lumpy	score=99;PE=8:PE=7;SR=0:SU=5	exon	279982	280494	+	LOC_Os01g01540.1:exon_1
chr01	275624	282415	BreakDancer:DELLY:Lumpy	score=99;PE=8:PE=7;SR=0:SU=5	gene	280846	283924	-	LOC_Os01g01550
chr01	275624	282415	BreakDancer:DELLY:Lumpy	score=99;PE=8:PE=7;SR=0:SU=5	mRNA	280846	283924	-	LOC_Os01g01550.1
chr01	275624	282415	BreakDancer:DELLY:Lumpy	score=99;PE=8:PE=7;SR=0:SU=5	CDS	276285	276308	-	LOC_Os01g01530.1:cds_4
chr01	275624	282415	BreakDancer:DELLY:Lumpy	score=99;PE=8:PE=7;SR=0:SU=5	CDS	276390	276851	-	LOC_Os01g01530.1:cds_3
chr01	275624	282415	BreakDancer:DELLY:Lumpy	score=99;PE=8:PE=7;SR=0:SU=5	CDS	279982	280494	+	LOC_Os01g01540.1:cds_1
chr01	275624	282415	BreakDancer:DELLY:Lumpy	score=99;PE=8:PE=7;SR=0:SU=5	exon	280957	281102	-	LOC_Os01g01550.1:exon_4
chr01	275624	282415	BreakDancer:DELLY:Lumpy	score=99;PE=8:PE=7;SR=0:SU=5	CDS	280957	281102	-	LOC_Os01g01550.1:cds_4
chr01	275624	282415	BreakDancer:DELLY:Lumpy	score=99;PE=8:PE=7;SR=0:SU=5	exon	281151	281807	-	LOC_Os01g01550.1:exon_3
chr01	275624	282415	BreakDancer:DELLY:Lumpy	score=99;PE=8:PE=7;SR=0:SU=5	exon	280846	280909	-	LOC_Os01g01550.1:exon_5
chr01	275264	284428	Pindel:CNVnator	SR=3;score=4:eval1=9.70322e-07;eval2=9272600;eval3=0.000261777;eval4=28138300	gene	276285	277881	-	LOC_Os01g01530
chr01	275264	284428	Pindel:CNVnator	SR=3;score=4:eval1=9.70322e-07;eval2=9272600;eval3=0.000261777;eval4=28138300	exon	276390	276851	-	LOC_Os01g01530.1:exon_3
chr01	275264	284428	Pindel:CNVnator	SR=3;score=4:eval1=9.70322e-07;eval2=9272600;eval3=0.000261777;eval4=28138300	gene	279982	280494	+	LOC_Os01g01540
chr01	275264	284428	Pindel:CNVnator	SR=3;score=4:eval1=9.70322e-07;eval2=9272600;eval3=0.000261777;eval4=28138300	exon	277752	277881	-	LOC_Os01g01530.1:exon_1
chr01	275264	284428	Pindel:CNVnator	SR=3;score=4:eval1=9.70322e-07;eval2=9272600;eval3=0.000261777;eval4=28138300	CDS	276930	277663	-	LOC_Os01g01530.1:cds_2
chr01	275264	284428	Pindel:CNVnator	SR=3;score=4:eval1=9.70322e-07;eval2=9272600;eval3=0.000261777;eval4=28138300	mRNA	276285	277881	-	LOC_Os01g01530.1
chr01	275264	284428	Pindel:CNVnator	SR=3;score=4:eval1=9.70322e-07;eval2=9272600;eval3=0.000261777;eval4=28138300	exon	279982	280494	+	LOC_Os01g01540.1:exon_1
chr01	275264	284428	Pindel:CNVnator	SR=3;score=4:eval1=9.70322e-07;eval2=9272600;eval3=0.000261777;eval4=28138300	CDS	277752	277881	-	LOC_Os01g01530.1:cds_1
chr01	275264	284428	Pindel:CNVnator	SR=3;score=4:eval1=9.70322e-07;eval2=9272600;eval3=0.000261777;eval4=28138300	mRNA	279982	280494	+	LOC_Os01g01540.1
chr01	275264	284428	Pindel:CNVnator	SR=3;score=4:eval1=9.70322e-07;eval2=9272600;eval3=0.000261777;eval4=28138300	CDS	279982	280494	+	LOC_Os01g01540.1:cds_1
chr01	275264	284428	Pindel:CNVnator	SR=3;score=4:eval1=9.70322e-07;eval2=9272600;eval3=0.000261777;eval4=28138300	gene	280846	283924	-	LOC_Os01g01550
chr01	275264	284428	Pindel:CNVnator	SR=3;score=4:eval1=9.70322e-07;eval2=9272600;eval3=0.000261777;eval4=28138300	exon	282690	282785	-	LOC_Os01g01550.1:exon_2
chr01	275264	284428	Pindel:CNVnator	SR=3;score=4:eval1=9.70322e-07;eval2=9272600;eval3=0.000261777;eval4=28138300	CDS	276390	276851	-	LOC_Os01g01530.1:cds_3
chr01	275264	284428	Pindel:CNVnator	SR=3;score=4:eval1=9.70322e-07;eval2=9272600;eval3=0.000261777;eval4=28138300	CDS	276285	276308	-	LOC_Os01g01530.1:cds_4
chr01	275264	284428	Pindel:CNVnator	SR=3;score=4:eval1=9.70322e-07;eval2=9272600;eval3=0.000261777;eval4=28138300	exon	276285	276308	-	LOC_Os01g01530.1:exon_4
chr01	275264	284428	Pindel:CNVnator	SR=3;score=4:eval1=9.70322e-07;eval2=9272600;eval3=0.000261777;eval4=28138300	exon	280957	281102	-	LOC_Os01g01550.1:exon_4
chr01	275264	284428	Pindel:CNVnator	SR=3;score=4:eval1=9.70322e-07;eval2=9272600;eval3=0.000261777;eval4=28138300	exon	280846	280909	-	LOC_Os01g01550.1:exon_5
chr01	275264	284428	Pindel:CNVnator	SR=3;score=4:eval1=9.70322e-07;eval2=9272600;eval3=0.000261777;eval4=28138300	exon	281151	281807	-	LOC_Os01g01550.1:exon_3
chr01	275264	284428	Pindel:CNVnator	SR=3;score=4:eval1=9.70322e-07;eval2=9272600;eval3=0.000261777;eval4=28138300	CDS	283559	283924	-	LOC_Os01g01550.1:cds_1
chr01	275264	284428	Pindel:CNVnator	SR=3;score=4:eval1=9.70322e-07;eval2=9272600;eval3=0.000261777;eval4=28138300	CDS	282690	282785	-	LOC_Os01g01550.1:cds_2
chr01	275264	284428	Pindel:CNVnator	SR=3;score=4:eval1=9.70322e-07;eval2=9272600;eval3=0.000261777;eval4=28138300	CDS	281151	281807	-	LOC_Os01g01550.1:cds_3
chr01	275264	284428	Pindel:CNVnator	SR=3;score=4:eval1=9.70322e-07;eval2=9272600;eval3=0.000261777;eval4=28138300	mRNA	280846	283924	-	LOC_Os01g01550.1
chr01	275264	284428	Pindel:CNVnator	SR=3;score=4:eval1=9.70322e-07;eval2=9272600;eval3=0.000261777;eval4=28138300	CDS	280957	281102	-	LOC_Os01g01550.1:cds_4
chr01	275264	284428	Pindel:CNVnator	SR=3;score=4:eval1=9.70322e-07;eval2=9272600;eval3=0.000261777;eval4=28138300	exon	283559	283924	-	LOC_Os01g01550.1:exon_1
chr01	275264	284428	Pindel:CNVnator	SR=3;score=4:eval1=9.70322e-07;eval2=9272600;eval3=0.000261777;eval4=28138300	exon	276930	277663	-	LOC_Os01g01530.1:exon_2
chr01	275264	284428	Pindel:CNVnator	SR=3;score=4:eval1=9.70322e-07;eval2=9272600;eval3=0.000261777;eval4=28138300	CDS	280846	280909	-	LOC_Os01g01550.1:cds_5
chr01	301388	301656	BreakDancer:Pindel:DELLY:SVseq2	score=99;PE=15:SR=9;score=24:PE=0;SR=6:SR=9	NA	NA	NA	NA	NA
chr01	313252	314349	BreakDancer:DELLY:CNVnator	score=99;PE=10:PE=11;SR=0:eval1=212.32;eval2=8.32619e-05;eval3=1;eval4=1	NA	NA	NA	NA	NA
chr01	396857	397095	Pindel:DELLY:SVseq2	SR=12;score=48:PE=0;SR=5:SR=4	NA	NA	NA	NA	NA
chr01	398126	399164	BreakDancer:Pindel:DELLY:Lumpy	score=99;PE=13:SR=4;score=8:PE=11;SR=6:SU=4	NA	NA	NA	NA	NA
chr01	400766	401011	BreakDancer:Pindel:SVseq2:Lumpy	score=99;PE=9:SR=6;score=15:SR=4:SU=4	NA	NA	NA	NA	NA
chr01	403558	405083	DELLY:CNVnator	PE=3;SR=0:eval1=120.551;eval2=0.0365423;eval3=1;eval4=1	gene	403692	404402	-	LOC_Os01g01760
chr01	403558	405083	DELLY:CNVnator	PE=3;SR=0:eval1=120.551;eval2=0.0365423;eval3=1;eval4=1	mRNA	403692	404402	-	LOC_Os01g01760.1
chr01	403558	405083	DELLY:CNVnator	PE=3;SR=0:eval1=120.551;eval2=0.0365423;eval3=1;eval4=1	exon	403692	404402	-	LOC_Os01g01760.1:exon_1
chr01	403558	405083	DELLY:CNVnator	PE=3;SR=0:eval1=120.551;eval2=0.0365423;eval3=1;eval4=1	CDS	403692	404402	-	LOC_Os01g01760.1:cds_1
chr01	405782	406294	BreakDancer:Pindel:DELLY	score=99;PE=13:SR=4;score=8:PE=15;SR=0	NA	NA	NA	NA	NA
chr01	434830	435207	DELLY:Lumpy	PE=4;SR=0:SU=4	NA	NA	NA	NA	NA
chr01	436234	436808	BreakDancer:DELLY	score=99;PE=5:PE=7;SR=0	NA	NA	NA	NA	NA
chr01	448184	448469	BreakDancer:Pindel	score=99;PE=12:SR=12;score=33	gene	437613	449137	+	LOC_Os01g01830
chr01	448184	448469	BreakDancer:Pindel	score=99;PE=12:SR=12;score=33	mRNA	437613	449137	+	LOC_Os01g01830.1
chr01	465110	478002	BreakDancer:Pindel:DELLY:SVseq2:Lumpy	score=99;PE=14:SR=5;score=10:PE=14;SR=0:SR=4:SU=5	gene	466280	472435	+	LOC_Os01g01850
chr01	465110	478002	BreakDancer:Pindel:DELLY:SVseq2:Lumpy	score=99;PE=14:SR=5;score=10:PE=14;SR=0:SR=4:SU=5	mRNA	466280	472435	+	LOC_Os01g01850.1
chr01	465110	478002	BreakDancer:Pindel:DELLY:SVseq2:Lumpy	score=99;PE=14:SR=5;score=10:PE=14;SR=0:SR=4:SU=5	exon	466280	468634	+	LOC_Os01g01850.1:exon_1
chr01	465110	478002	BreakDancer:Pindel:DELLY:SVseq2:Lumpy	score=99;PE=14:SR=5;score=10:PE=14;SR=0:SR=4:SU=5	exon	468707	472435	+	LOC_Os01g01850.1:exon_2
chr01	465110	478002	BreakDancer:Pindel:DELLY:SVseq2:Lumpy	score=99;PE=14:SR=5;score=10:PE=14;SR=0:SR=4:SU=5	CDS	466280	468634	+	LOC_Os01g01850.1:cds_1
chr01	465110	478002	BreakDancer:Pindel:DELLY:SVseq2:Lumpy	score=99;PE=14:SR=5;score=10:PE=14;SR=0:SR=4:SU=5	CDS	468707	472435	+	LOC_Os01g01850.1:cds_2
chr01	465110	478002	BreakDancer:Pindel:DELLY:SVseq2:Lumpy	score=99;PE=14:SR=5;score=10:PE=14;SR=0:SR=4:SU=5	gene	473074	476310	-	LOC_Os01g01860
chr01	465110	478002	BreakDancer:Pindel:DELLY:SVseq2:Lumpy	score=99;PE=14:SR=5;score=10:PE=14;SR=0:SR=4:SU=5	mRNA	473074	476310	-	LOC_Os01g01860.1
chr01	465110	478002	BreakDancer:Pindel:DELLY:SVseq2:Lumpy	score=99;PE=14:SR=5;score=10:PE=14;SR=0:SR=4:SU=5	exon	475049	476310	-	LOC_Os01g01860.1:exon_1
chr01	465110	478002	BreakDancer:Pindel:DELLY:SVseq2:Lumpy	score=99;PE=14:SR=5;score=10:PE=14;SR=0:SR=4:SU=5	exon	473074	474955	-	LOC_Os01g01860.1:exon_2
chr01	465110	478002	BreakDancer:Pindel:DELLY:SVseq2:Lumpy	score=99;PE=14:SR=5;score=10:PE=14;SR=0:SR=4:SU=5	CDS	475049	476310	-	LOC_Os01g01860.1:cds_1
chr01	465110	478002	BreakDancer:Pindel:DELLY:SVseq2:Lumpy	score=99;PE=14:SR=5;score=10:PE=14;SR=0:SR=4:SU=5	CDS	473074	474955	-	LOC_Os01g01860.1:cds_2
chr01	581114	581465	BreakDancer:DELLY:SVseq2	score=99;PE=22:PE=24;SR=0:SR=3	NA	NA	NA	NA	NA
chr01	673547	673665	BreakDancer:Pindel:SVseq2	score=99;PE=17:SR=10;score=35:SR=3	NA	NA	NA	NA	NA
chr01	678415	685184	BreakDancer:Pindel:DELLY:SVseq2	score=75;PE=5:SR=7;score=18:PE=7;SR=5:SR=6	gene	678778	684594	-	LOC_Os01g02240
chr01	678415	685184	BreakDancer:Pindel:DELLY:SVseq2	score=75;PE=5:SR=7;score=18:PE=7;SR=5:SR=6	mRNA	678778	684594	-	LOC_Os01g02240.1
chr01	678415	685184	BreakDancer:Pindel:DELLY:SVseq2	score=75;PE=5:SR=7;score=18:PE=7;SR=5:SR=6	exon	681960	684594	-	LOC_Os01g02240.1:exon_1
chr01	678415	685184	BreakDancer:Pindel:DELLY:SVseq2	score=75;PE=5:SR=7;score=18:PE=7;SR=5:SR=6	exon	681400	681544	-	LOC_Os01g02240.1:exon_2
chr01	678415	685184	BreakDancer:Pindel:DELLY:SVseq2	score=75;PE=5:SR=7;score=18:PE=7;SR=5:SR=6	exon	680931	681297	-	LOC_Os01g02240.1:exon_3
chr01	678415	685184	BreakDancer:Pindel:DELLY:SVseq2	score=75;PE=5:SR=7;score=18:PE=7;SR=5:SR=6	exon	680438	680851	-	LOC_Os01g02240.1:exon_4
chr01	678415	685184	BreakDancer:Pindel:DELLY:SVseq2	score=75;PE=5:SR=7;score=18:PE=7;SR=5:SR=6	exon	680060	680358	-	LOC_Os01g02240.1:exon_5
chr01	678415	685184	BreakDancer:Pindel:DELLY:SVseq2	score=75;PE=5:SR=7;score=18:PE=7;SR=5:SR=6	exon	679695	679956	-	LOC_Os01g02240.1:exon_6
chr01	678415	685184	BreakDancer:Pindel:DELLY:SVseq2	score=75;PE=5:SR=7;score=18:PE=7;SR=5:SR=6	exon	679424	679609	-	LOC_Os01g02240.1:exon_7
chr01	678415	685184	BreakDancer:Pindel:DELLY:SVseq2	score=75;PE=5:SR=7;score=18:PE=7;SR=5:SR=6	exon	679194	679262	-	LOC_Os01g02240.1:exon_8
chr01	678415	685184	BreakDancer:Pindel:DELLY:SVseq2	score=75;PE=5:SR=7;score=18:PE=7;SR=5:SR=6	exon	678778	679158	-	LOC_Os01g02240.1:exon_9
chr01	678415	685184	BreakDancer:Pindel:DELLY:SVseq2	score=75;PE=5:SR=7;score=18:PE=7;SR=5:SR=6	CDS	681960	684594	-	LOC_Os01g02240.1:cds_1
chr01	678415	685184	BreakDancer:Pindel:DELLY:SVseq2	score=75;PE=5:SR=7;score=18:PE=7;SR=5:SR=6	CDS	681400	681544	-	LOC_Os01g02240.1:cds_2
chr01	678415	685184	BreakDancer:Pindel:DELLY:SVseq2	score=75;PE=5:SR=7;score=18:PE=7;SR=5:SR=6	CDS	680931	681297	-	LOC_Os01g02240.1:cds_3
chr01	678415	685184	BreakDancer:Pindel:DELLY:SVseq2	score=75;PE=5:SR=7;score=18:PE=7;SR=5:SR=6	CDS	680438	680851	-	LOC_Os01g02240.1:cds_4
chr01	678415	685184	BreakDancer:Pindel:DELLY:SVseq2	score=75;PE=5:SR=7;score=18:PE=7;SR=5:SR=6	CDS	680060	680358	-	LOC_Os01g02240.1:cds_5
chr01	678415	685184	BreakDancer:Pindel:DELLY:SVseq2	score=75;PE=5:SR=7;score=18:PE=7;SR=5:SR=6	CDS	679695	679956	-	LOC_Os01g02240.1:cds_6
chr01	678415	685184	BreakDancer:Pindel:DELLY:SVseq2	score=75;PE=5:SR=7;score=18:PE=7;SR=5:SR=6	CDS	679424	679609	-	LOC_Os01g02240.1:cds_7
chr01	678415	685184	BreakDancer:Pindel:DELLY:SVseq2	score=75;PE=5:SR=7;score=18:PE=7;SR=5:SR=6	CDS	679194	679262	-	LOC_Os01g02240.1:cds_8
chr01	678415	685184	BreakDancer:Pindel:DELLY:SVseq2	score=75;PE=5:SR=7;score=18:PE=7;SR=5:SR=6	CDS	678778	679158	-	LOC_Os01g02240.1:cds_9
chr01	715301	716808	BreakDancer:Pindel:DELLY:Lumpy	score=99;PE=6:SR=4;score=5:PE=8;SR=0:SU=4	NA	NA	NA	NA	NA
chr01	726790	727485	BreakDancer:DELLY	score=99;PE=7:PE=8;SR=0	NA	NA	NA	NA	NA
chr01	750177	763667	BreakDancer:Pindel:DELLY:CNVnator:Lumpy	score=99;PE=24:SR=9;score=24:PE=26;SR=0:eval1=1.03592e-09;eval2=8196.67;eval3=8.36471e-07;eval4=55628.4:SU=6	gene	752080	754992	-	LOC_Os01g02370
chr01	750177	763667	BreakDancer:Pindel:DELLY:CNVnator:Lumpy	score=99;PE=24:SR=9;score=24:PE=26;SR=0:eval1=1.03592e-09;eval2=8196.67;eval3=8.36471e-07;eval4=55628.4:SU=6	mRNA	752080	754992	-	LOC_Os01g02370.1
chr01	750177	763667	BreakDancer:Pindel:DELLY:CNVnator:Lumpy	score=99;PE=24:SR=9;score=24:PE=26;SR=0:eval1=1.03592e-09;eval2=8196.67;eval3=8.36471e-07;eval4=55628.4:SU=6	exon	754188	754992	-	LOC_Os01g02370.1:exon_1
chr01	750177	763667	BreakDancer:Pindel:DELLY:CNVnator:Lumpy	score=99;PE=24:SR=9;score=24:PE=26;SR=0:eval1=1.03592e-09;eval2=8196.67;eval3=8.36471e-07;eval4=55628.4:SU=6	exon	753866	754056	-	LOC_Os01g02370.1:exon_2
chr01	750177	763667	BreakDancer:Pindel:DELLY:CNVnator:Lumpy	score=99;PE=24:SR=9;score=24:PE=26;SR=0:eval1=1.03592e-09;eval2=8196.67;eval3=8.36471e-07;eval4=55628.4:SU=6	exon	752080	753275	-	LOC_Os01g02370.1:exon_3
chr01	750177	763667	BreakDancer:Pindel:DELLY:CNVnator:Lumpy	score=99;PE=24:SR=9;score=24:PE=26;SR=0:eval1=1.03592e-09;eval2=8196.67;eval3=8.36471e-07;eval4=55628.4:SU=6	five_prime_UTR	754946	754992	-	LOC_Os01g02370.1:utr_2
chr01	750177	763667	BreakDancer:Pindel:DELLY:CNVnator:Lumpy	score=99;PE=24:SR=9;score=24:PE=26;SR=0:eval1=1.03592e-09;eval2=8196.67;eval3=8.36471e-07;eval4=55628.4:SU=6	CDS	754188	754945	-	LOC_Os01g02370.1:cds_1
chr01	750177	763667	BreakDancer:Pindel:DELLY:CNVnator:Lumpy	score=99;PE=24:SR=9;score=24:PE=26;SR=0:eval1=1.03592e-09;eval2=8196.67;eval3=8.36471e-07;eval4=55628.4:SU=6	CDS	753866	754056	-	LOC_Os01g02370.1:cds_2
chr01	750177	763667	BreakDancer:Pindel:DELLY:CNVnator:Lumpy	score=99;PE=24:SR=9;score=24:PE=26;SR=0:eval1=1.03592e-09;eval2=8196.67;eval3=8.36471e-07;eval4=55628.4:SU=6	CDS	752947	753275	-	LOC_Os01g02370.1:cds_3
chr01	750177	763667	BreakDancer:Pindel:DELLY:CNVnator:Lumpy	score=99;PE=24:SR=9;score=24:PE=26;SR=0:eval1=1.03592e-09;eval2=8196.67;eval3=8.36471e-07;eval4=55628.4:SU=6	three_prime_UTR	752080	752946	-	LOC_Os01g02370.1:utr_1
chr01	750177	763667	BreakDancer:Pindel:DELLY:CNVnator:Lumpy	score=99;PE=24:SR=9;score=24:PE=26;SR=0:eval1=1.03592e-09;eval2=8196.67;eval3=8.36471e-07;eval4=55628.4:SU=6	gene	756894	762050	-	LOC_Os01g02380
chr01	750177	763667	BreakDancer:Pindel:DELLY:CNVnator:Lumpy	score=99;PE=24:SR=9;score=24:PE=26;SR=0:eval1=1.03592e-09;eval2=8196.67;eval3=8.36471e-07;eval4=55628.4:SU=6	mRNA	756894	762050	-	LOC_Os01g02380.1
chr01	750177	763667	BreakDancer:Pindel:DELLY:CNVnator:Lumpy	score=99;PE=24:SR=9;score=24:PE=26;SR=0:eval1=1.03592e-09;eval2=8196.67;eval3=8.36471e-07;eval4=55628.4:SU=6	exon	759718	762050	-	LOC_Os01g02380.1:exon_1
chr01	750177	763667	BreakDancer:Pindel:DELLY:CNVnator:Lumpy	score=99;PE=24:SR=9;score=24:PE=26;SR=0:eval1=1.03592e-09;eval2=8196.67;eval3=8.36471e-07;eval4=55628.4:SU=6	exon	758086	758598	-	LOC_Os01g02380.1:exon_2
chr01	750177	763667	BreakDancer:Pindel:DELLY:CNVnator:Lumpy	score=99;PE=24:SR=9;score=24:PE=26;SR=0:eval1=1.03592e-09;eval2=8196.67;eval3=8.36471e-07;eval4=55628.4:SU=6	exon	756894	757662	-	LOC_Os01g02380.1:exon_3
chr01	750177	763667	BreakDancer:Pindel:DELLY:CNVnator:Lumpy	score=99;PE=24:SR=9;score=24:PE=26;SR=0:eval1=1.03592e-09;eval2=8196.67;eval3=8.36471e-07;eval4=55628.4:SU=6	CDS	759718	762050	-	LOC_Os01g02380.1:cds_1
chr01	750177	763667	BreakDancer:Pindel:DELLY:CNVnator:Lumpy	score=99;PE=24:SR=9;score=24:PE=26;SR=0:eval1=1.03592e-09;eval2=8196.67;eval3=8.36471e-07;eval4=55628.4:SU=6	CDS	758086	758598	-	LOC_Os01g02380.1:cds_2
chr01	750177	763667	BreakDancer:Pindel:DELLY:CNVnator:Lumpy	score=99;PE=24:SR=9;score=24:PE=26;SR=0:eval1=1.03592e-09;eval2=8196.67;eval3=8.36471e-07;eval4=55628.4:SU=6	CDS	756894	757662	-	LOC_Os01g02380.1:cds_3
chr01	792178	792662	DELLY:Lumpy	PE=7;SR=0:SU=4	gene	789967	792411	+	LOC_Os01g02440
chr01	792178	792662	DELLY:Lumpy	PE=7;SR=0:SU=4	mRNA	789967	792411	+	LOC_Os01g02440.1
chr01	792178	792662	DELLY:Lumpy	PE=7;SR=0:SU=4	exon	791339	792411	+	LOC_Os01g02440.1:exon_3
chr01	792178	792662	DELLY:Lumpy	PE=7;SR=0:SU=4	CDS	791339	792411	+	LOC_Os01g02440.1:cds_3
chr01	816549	831939	BreakDancer:DELLY:CNVnator:Lumpy	score=98;PE=5:PE=7;SR=0:eval1=1.45729e-07;eval2=238289000;eval3=2.12366e-05;eval4=334583000:SU=4	gene	817542	818335	+	LOC_Os01g02510
chr01	816549	831939	BreakDancer:DELLY:CNVnator:Lumpy	score=98;PE=5:PE=7;SR=0:eval1=1.45729e-07;eval2=238289000;eval3=2.12366e-05;eval4=334583000:SU=4	mRNA	817542	818335	+	LOC_Os01g02510.1
chr01	816549	831939	BreakDancer:DELLY:CNVnator:Lumpy	score=98;PE=5:PE=7;SR=0:eval1=1.45729e-07;eval2=238289000;eval3=2.12366e-05;eval4=334583000:SU=4	exon	817542	818335	+	LOC_Os01g02510.1:exon_1
chr01	816549	831939	BreakDancer:DELLY:CNVnator:Lumpy	score=98;PE=5:PE=7;SR=0:eval1=1.45729e-07;eval2=238289000;eval3=2.12366e-05;eval4=334583000:SU=4	CDS	817542	818168	+	LOC_Os01g02510.1:cds_1
chr01	816549	831939	BreakDancer:DELLY:CNVnator:Lumpy	score=98;PE=5:PE=7;SR=0:eval1=1.45729e-07;eval2=238289000;eval3=2.12366e-05;eval4=334583000:SU=4	three_prime_UTR	818169	818335	+	LOC_Os01g02510.1:utr_1
chr01	816549	831939	BreakDancer:DELLY:CNVnator:Lumpy	score=98;PE=5:PE=7;SR=0:eval1=1.45729e-07;eval2=238289000;eval3=2.12366e-05;eval4=334583000:SU=4	gene	821344	824007	+	LOC_Os01g02520
chr01	816549	831939	BreakDancer:DELLY:CNVnator:Lumpy	score=98;PE=5:PE=7;SR=0:eval1=1.45729e-07;eval2=238289000;eval3=2.12366e-05;eval4=334583000:SU=4	mRNA	821344	824007	+	LOC_Os01g02520.1
chr01	816549	831939	BreakDancer:DELLY:CNVnator:Lumpy	score=98;PE=5:PE=7;SR=0:eval1=1.45729e-07;eval2=238289000;eval3=2.12366e-05;eval4=334583000:SU=4	exon	821344	821960	+	LOC_Os01g02520.1:exon_1
chr01	816549	831939	BreakDancer:DELLY:CNVnator:Lumpy	score=98;PE=5:PE=7;SR=0:eval1=1.45729e-07;eval2=238289000;eval3=2.12366e-05;eval4=334583000:SU=4	exon	822060	824007	+	LOC_Os01g02520.1:exon_2
chr01	816549	831939	BreakDancer:DELLY:CNVnator:Lumpy	score=98;PE=5:PE=7;SR=0:eval1=1.45729e-07;eval2=238289000;eval3=2.12366e-05;eval4=334583000:SU=4	CDS	821344	821960	+	LOC_Os01g02520.1:cds_1
chr01	816549	831939	BreakDancer:DELLY:CNVnator:Lumpy	score=98;PE=5:PE=7;SR=0:eval1=1.45729e-07;eval2=238289000;eval3=2.12366e-05;eval4=334583000:SU=4	CDS	822060	824007	+	LOC_Os01g02520.1:cds_2
chr01	816549	831939	BreakDancer:DELLY:CNVnator:Lumpy	score=98;PE=5:PE=7;SR=0:eval1=1.45729e-07;eval2=238289000;eval3=2.12366e-05;eval4=334583000:SU=4	gene	824624	830778	-	LOC_Os01g02530
chr01	816549	831939	BreakDancer:DELLY:CNVnator:Lumpy	score=98;PE=5:PE=7;SR=0:eval1=1.45729e-07;eval2=238289000;eval3=2.12366e-05;eval4=334583000:SU=4	mRNA	824624	830778	-	LOC_Os01g02530.1
chr01	816549	831939	BreakDancer:DELLY:CNVnator:Lumpy	score=98;PE=5:PE=7;SR=0:eval1=1.45729e-07;eval2=238289000;eval3=2.12366e-05;eval4=334583000:SU=4	exon	829827	830778	-	LOC_Os01g02530.1:exon_1
chr01	816549	831939	BreakDancer:DELLY:CNVnator:Lumpy	score=98;PE=5:PE=7;SR=0:eval1=1.45729e-07;eval2=238289000;eval3=2.12366e-05;eval4=334583000:SU=4	exon	828425	829761	-	LOC_Os01g02530.1:exon_2
chr01	816549	831939	BreakDancer:DELLY:CNVnator:Lumpy	score=98;PE=5:PE=7;SR=0:eval1=1.45729e-07;eval2=238289000;eval3=2.12366e-05;eval4=334583000:SU=4	exon	826571	828352	-	LOC_Os01g02530.1:exon_3
chr01	816549	831939	BreakDancer:DELLY:CNVnator:Lumpy	score=98;PE=5:PE=7;SR=0:eval1=1.45729e-07;eval2=238289000;eval3=2.12366e-05;eval4=334583000:SU=4	exon	824624	826366	-	LOC_Os01g02530.1:exon_4
chr01	816549	831939	BreakDancer:DELLY:CNVnator:Lumpy	score=98;PE=5:PE=7;SR=0:eval1=1.45729e-07;eval2=238289000;eval3=2.12366e-05;eval4=334583000:SU=4	CDS	829827	830778	-	LOC_Os01g02530.1:cds_1
chr01	816549	831939	BreakDancer:DELLY:CNVnator:Lumpy	score=98;PE=5:PE=7;SR=0:eval1=1.45729e-07;eval2=238289000;eval3=2.12366e-05;eval4=334583000:SU=4	CDS	828425	829761	-	LOC_Os01g02530.1:cds_2
chr01	816549	831939	BreakDancer:DELLY:CNVnator:Lumpy	score=98;PE=5:PE=7;SR=0:eval1=1.45729e-07;eval2=238289000;eval3=2.12366e-05;eval4=334583000:SU=4	CDS	826571	828352	-	LOC_Os01g02530.1:cds_3
chr01	816549	831939	BreakDancer:DELLY:CNVnator:Lumpy	score=98;PE=5:PE=7;SR=0:eval1=1.45729e-07;eval2=238289000;eval3=2.12366e-05;eval4=334583000:SU=4	CDS	824624	826366	-	LOC_Os01g02530.1:cds_4
chr01	856361	857161	BreakDancer:DELLY:Lumpy	score=93;PE=4:PE=7;SR=0:SU=4	NA	NA	NA	NA	NA
chr01	865424	865566	BreakDancer:Pindel:DELLY:SVseq2	score=99;PE=9:SR=9;score=28:PE=0;SR=7:SR=6	NA	NA	NA	NA	NA
chr01	871211	871866	BreakDancer:Pindel:DELLY:SVseq2:Lumpy	score=99;PE=9:SR=6;score=15:PE=10;SR=0:SR=3:SU=4	gene	870318	874817	-	LOC_Os01g02610
chr01	871211	871866	BreakDancer:Pindel:DELLY:SVseq2:Lumpy	score=99;PE=9:SR=6;score=15:PE=10;SR=0:SR=3:SU=4	mRNA	870318	874817	-	LOC_Os01g02610.1
chr01	871211	871866	BreakDancer:Pindel:DELLY:SVseq2:Lumpy	score=99;PE=9:SR=6;score=15:PE=10;SR=0:SR=3:SU=4	exon	871662	871807	-	LOC_Os01g02610.1:exon_4
chr01	871211	871866	BreakDancer:Pindel:DELLY:SVseq2:Lumpy	score=99;PE=9:SR=6;score=15:PE=10;SR=0:SR=3:SU=4	exon	871354	871460	-	LOC_Os01g02610.1:exon_5
chr01	871211	871866	BreakDancer:Pindel:DELLY:SVseq2:Lumpy	score=99;PE=9:SR=6;score=15:PE=10;SR=0:SR=3:SU=4	CDS	871662	871807	-	LOC_Os01g02610.1:cds_4
chr01	871211	871866	BreakDancer:Pindel:DELLY:SVseq2:Lumpy	score=99;PE=9:SR=6;score=15:PE=10;SR=0:SR=3:SU=4	CDS	871354	871460	-	LOC_Os01g02610.1:cds_5
chr01	937289	937631	BreakDancer:Pindel:DELLY:SVseq2:softSearch	score=99;PE=19:SR=10;score=32:PE=19;SR=7:SR=9:nr=20;sc=7	gene	935574	938367	-	LOC_Os01g02730
chr01	937289	937631	BreakDancer:Pindel:DELLY:SVseq2:softSearch	score=99;PE=19:SR=10;score=32:PE=19;SR=7:SR=9:nr=20;sc=7	mRNA	935574	938367	-	LOC_Os01g02730.1
chr01	939700	953819	BreakDancer:DELLY:CNVnator:SVseq2:Lumpy	score=99;PE=15:PE=17;SR=8:eval1=1.37897e-09;eval2=82736100;eval3=4.78623e-07;eval4=130117000:SR=6:SU=4	gene	940005	952451	-	LOC_Os01g02740
chr01	939700	953819	BreakDancer:DELLY:CNVnator:SVseq2:Lumpy	score=99;PE=15:PE=17;SR=8:eval1=1.37897e-09;eval2=82736100;eval3=4.78623e-07;eval4=130117000:SR=6:SU=4	mRNA	940005	952451	-	LOC_Os01g02740.1
chr01	939700	953819	BreakDancer:DELLY:CNVnator:SVseq2:Lumpy	score=99;PE=15:PE=17;SR=8:eval1=1.37897e-09;eval2=82736100;eval3=4.78623e-07;eval4=130117000:SR=6:SU=4	exon	952248	952451	-	LOC_Os01g02740.1:exon_1
chr01	939700	953819	BreakDancer:DELLY:CNVnator:SVseq2:Lumpy	score=99;PE=15:PE=17;SR=8:eval1=1.37897e-09;eval2=82736100;eval3=4.78623e-07;eval4=130117000:SR=6:SU=4	exon	951982	952145	-	LOC_Os01g02740.1:exon_2
chr01	939700	953819	BreakDancer:DELLY:CNVnator:SVseq2:Lumpy	score=99;PE=15:PE=17;SR=8:eval1=1.37897e-09;eval2=82736100;eval3=4.78623e-07;eval4=130117000:SR=6:SU=4	exon	951425	951690	-	LOC_Os01g02740.1:exon_3
chr01	939700	953819	BreakDancer:DELLY:CNVnator:SVseq2:Lumpy	score=99;PE=15:PE=17;SR=8:eval1=1.37897e-09;eval2=82736100;eval3=4.78623e-07;eval4=130117000:SR=6:SU=4	exon	949404	950929	-	LOC_Os01g02740.1:exon_4
chr01	939700	953819	BreakDancer:DELLY:CNVnator:SVseq2:Lumpy	score=99;PE=15:PE=17;SR=8:eval1=1.37897e-09;eval2=82736100;eval3=4.78623e-07;eval4=130117000:SR=6:SU=4	exon	948920	949268	-	LOC_Os01g02740.1:exon_5
chr01	939700	953819	BreakDancer:DELLY:CNVnator:SVseq2:Lumpy	score=99;PE=15:PE=17;SR=8:eval1=1.37897e-09;eval2=82736100;eval3=4.78623e-07;eval4=130117000:SR=6:SU=4	exon	947262	948612	-	LOC_Os01g02740.1:exon_6
chr01	939700	953819	BreakDancer:DELLY:CNVnator:SVseq2:Lumpy	score=99;PE=15:PE=17;SR=8:eval1=1.37897e-09;eval2=82736100;eval3=4.78623e-07;eval4=130117000:SR=6:SU=4	exon	946427	946646	-	LOC_Os01g02740.1:exon_7
chr01	939700	953819	BreakDancer:DELLY:CNVnator:SVseq2:Lumpy	score=99;PE=15:PE=17;SR=8:eval1=1.37897e-09;eval2=82736100;eval3=4.78623e-07;eval4=130117000:SR=6:SU=4	exon	945668	945751	-	LOC_Os01g02740.1:exon_8
chr01	939700	953819	BreakDancer:DELLY:CNVnator:SVseq2:Lumpy	score=99;PE=15:PE=17;SR=8:eval1=1.37897e-09;eval2=82736100;eval3=4.78623e-07;eval4=130117000:SR=6:SU=4	exon	945122	945511	-	LOC_Os01g02740.1:exon_9
chr01	939700	953819	BreakDancer:DELLY:CNVnator:SVseq2:Lumpy	score=99;PE=15:PE=17;SR=8:eval1=1.37897e-09;eval2=82736100;eval3=4.78623e-07;eval4=130117000:SR=6:SU=4	exon	940005	944249	-	LOC_Os01g02740.1:exon_10
chr01	939700	953819	BreakDancer:DELLY:CNVnator:SVseq2:Lumpy	score=99;PE=15:PE=17;SR=8:eval1=1.37897e-09;eval2=82736100;eval3=4.78623e-07;eval4=130117000:SR=6:SU=4	CDS	952248	952451	-	LOC_Os01g02740.1:cds_1
chr01	939700	953819	BreakDancer:DELLY:CNVnator:SVseq2:Lumpy	score=99;PE=15:PE=17;SR=8:eval1=1.37897e-09;eval2=82736100;eval3=4.78623e-07;eval4=130117000:SR=6:SU=4	CDS	951982	952145	-	LOC_Os01g02740.1:cds_2
chr01	939700	953819	BreakDancer:DELLY:CNVnator:SVseq2:Lumpy	score=99;PE=15:PE=17;SR=8:eval1=1.37897e-09;eval2=82736100;eval3=4.78623e-07;eval4=130117000:SR=6:SU=4	CDS	951425	951690	-	LOC_Os01g02740.1:cds_3
chr01	939700	953819	BreakDancer:DELLY:CNVnator:SVseq2:Lumpy	score=99;PE=15:PE=17;SR=8:eval1=1.37897e-09;eval2=82736100;eval3=4.78623e-07;eval4=130117000:SR=6:SU=4	CDS	949404	950929	-	LOC_Os01g02740.1:cds_4
chr01	939700	953819	BreakDancer:DELLY:CNVnator:SVseq2:Lumpy	score=99;PE=15:PE=17;SR=8:eval1=1.37897e-09;eval2=82736100;eval3=4.78623e-07;eval4=130117000:SR=6:SU=4	CDS	948920	949268	-	LOC_Os01g02740.1:cds_5
chr01	939700	953819	BreakDancer:DELLY:CNVnator:SVseq2:Lumpy	score=99;PE=15:PE=17;SR=8:eval1=1.37897e-09;eval2=82736100;eval3=4.78623e-07;eval4=130117000:SR=6:SU=4	CDS	947262	948612	-	LOC_Os01g02740.1:cds_6
chr01	939700	953819	BreakDancer:DELLY:CNVnator:SVseq2:Lumpy	score=99;PE=15:PE=17;SR=8:eval1=1.37897e-09;eval2=82736100;eval3=4.78623e-07;eval4=130117000:SR=6:SU=4	CDS	946427	946646	-	LOC_Os01g02740.1:cds_7
chr01	939700	953819	BreakDancer:DELLY:CNVnator:SVseq2:Lumpy	score=99;PE=15:PE=17;SR=8:eval1=1.37897e-09;eval2=82736100;eval3=4.78623e-07;eval4=130117000:SR=6:SU=4	CDS	945668	945751	-	LOC_Os01g02740.1:cds_8
chr01	939700	953819	BreakDancer:DELLY:CNVnator:SVseq2:Lumpy	score=99;PE=15:PE=17;SR=8:eval1=1.37897e-09;eval2=82736100;eval3=4.78623e-07;eval4=130117000:SR=6:SU=4	CDS	945122	945511	-	LOC_Os01g02740.1:cds_9
chr01	939700	953819	BreakDancer:DELLY:CNVnator:SVseq2:Lumpy	score=99;PE=15:PE=17;SR=8:eval1=1.37897e-09;eval2=82736100;eval3=4.78623e-07;eval4=130117000:SR=6:SU=4	CDS	940005	944249	-	LOC_Os01g02740.1:cds_10
chr01	954748	955006	BreakDancer:Pindel	score=99;PE=18:SR=3;score=6	gene	954075	956817	+	LOC_Os01g02750
chr01	954748	955006	BreakDancer:Pindel	score=99;PE=18:SR=3;score=6	mRNA	954075	956817	+	LOC_Os01g02750.1
chr01	964415	999721	Pindel:CNVnator	SR=8;score=24:eval1=4.57967e-12;eval2=8.92303e-15;eval3=4.82947e-12;eval4=1.46696e-13	gene	961681	965151	+	LOC_Os01g02770
chr01	964415	999721	Pindel:CNVnator	SR=8;score=24:eval1=4.57967e-12;eval2=8.92303e-15;eval3=4.82947e-12;eval4=1.46696e-13	mRNA	961681	965151	+	LOC_Os01g02770.1
chr01	964415	999721	Pindel:CNVnator	SR=8;score=24:eval1=4.57967e-12;eval2=8.92303e-15;eval3=4.82947e-12;eval4=1.46696e-13	exon	964079	965151	+	LOC_Os01g02770.1:exon_3
chr01	964415	999721	Pindel:CNVnator	SR=8;score=24:eval1=4.57967e-12;eval2=8.92303e-15;eval3=4.82947e-12;eval4=1.46696e-13	CDS	964079	965151	+	LOC_Os01g02770.1:cds_3
chr01	964415	999721	Pindel:CNVnator	SR=8;score=24:eval1=4.57967e-12;eval2=8.92303e-15;eval3=4.82947e-12;eval4=1.46696e-13	gene	969308	973327	-	LOC_Os01g02780
chr01	964415	999721	Pindel:CNVnator	SR=8;score=24:eval1=4.57967e-12;eval2=8.92303e-15;eval3=4.82947e-12;eval4=1.46696e-13	mRNA	969308	973327	-	LOC_Os01g02780.1
chr01	964415	999721	Pindel:CNVnator	SR=8;score=24:eval1=4.57967e-12;eval2=8.92303e-15;eval3=4.82947e-12;eval4=1.46696e-13	exon	972485	973327	-	LOC_Os01g02780.1:exon_1
chr01	964415	999721	Pindel:CNVnator	SR=8;score=24:eval1=4.57967e-12;eval2=8.92303e-15;eval3=4.82947e-12;eval4=1.46696e-13	exon	972191	972363	-	LOC_Os01g02780.1:exon_2
chr01	964415	999721	Pindel:CNVnator	SR=8;score=24:eval1=4.57967e-12;eval2=8.92303e-15;eval3=4.82947e-12;eval4=1.46696e-13	exon	969308	970664	-	LOC_Os01g02780.1:exon_3
chr01	964415	999721	Pindel:CNVnator	SR=8;score=24:eval1=4.57967e-12;eval2=8.92303e-15;eval3=4.82947e-12;eval4=1.46696e-13	five_prime_UTR	973306	973327	-	LOC_Os01g02780.1:utr_2
chr01	964415	999721	Pindel:CNVnator	SR=8;score=24:eval1=4.57967e-12;eval2=8.92303e-15;eval3=4.82947e-12;eval4=1.46696e-13	CDS	972485	973305	-	LOC_Os01g02780.1:cds_1
chr01	964415	999721	Pindel:CNVnator	SR=8;score=24:eval1=4.57967e-12;eval2=8.92303e-15;eval3=4.82947e-12;eval4=1.46696e-13	CDS	972191	972363	-	LOC_Os01g02780.1:cds_2
chr01	964415	999721	Pindel:CNVnator	SR=8;score=24:eval1=4.57967e-12;eval2=8.92303e-15;eval3=4.82947e-12;eval4=1.46696e-13	CDS	969487	970664	-	LOC_Os01g02780.1:cds_3
chr01	964415	999721	Pindel:CNVnator	SR=8;score=24:eval1=4.57967e-12;eval2=8.92303e-15;eval3=4.82947e-12;eval4=1.46696e-13	three_prime_UTR	969308	969486	-	LOC_Os01g02780.1:utr_1
chr01	964415	999721	Pindel:CNVnator	SR=8;score=24:eval1=4.57967e-12;eval2=8.92303e-15;eval3=4.82947e-12;eval4=1.46696e-13	gene	976766	980431	+	LOC_Os01g02790
chr01	964415	999721	Pindel:CNVnator	SR=8;score=24:eval1=4.57967e-12;eval2=8.92303e-15;eval3=4.82947e-12;eval4=1.46696e-13	mRNA	976766	980431	+	LOC_Os01g02790.1
chr01	964415	999721	Pindel:CNVnator	SR=8;score=24:eval1=4.57967e-12;eval2=8.92303e-15;eval3=4.82947e-12;eval4=1.46696e-13	exon	976766	977160	+	LOC_Os01g02790.1:exon_1
chr01	964415	999721	Pindel:CNVnator	SR=8;score=24:eval1=4.57967e-12;eval2=8.92303e-15;eval3=4.82947e-12;eval4=1.46696e-13	exon	978399	978441	+	LOC_Os01g02790.1:exon_2
chr01	964415	999721	Pindel:CNVnator	SR=8;score=24:eval1=4.57967e-12;eval2=8.92303e-15;eval3=4.82947e-12;eval4=1.46696e-13	exon	979049	979072	+	LOC_Os01g02790.1:exon_3
chr01	964415	999721	Pindel:CNVnator	SR=8;score=24:eval1=4.57967e-12;eval2=8.92303e-15;eval3=4.82947e-12;eval4=1.46696e-13	exon	979430	980431	+	LOC_Os01g02790.1:exon_4
chr01	964415	999721	Pindel:CNVnator	SR=8;score=24:eval1=4.57967e-12;eval2=8.92303e-15;eval3=4.82947e-12;eval4=1.46696e-13	CDS	976766	977160	+	LOC_Os01g02790.1:cds_1
chr01	964415	999721	Pindel:CNVnator	SR=8;score=24:eval1=4.57967e-12;eval2=8.92303e-15;eval3=4.82947e-12;eval4=1.46696e-13	CDS	978399	978441	+	LOC_Os01g02790.1:cds_2
chr01	964415	999721	Pindel:CNVnator	SR=8;score=24:eval1=4.57967e-12;eval2=8.92303e-15;eval3=4.82947e-12;eval4=1.46696e-13	CDS	979049	979072	+	LOC_Os01g02790.1:cds_3
chr01	964415	999721	Pindel:CNVnator	SR=8;score=24:eval1=4.57967e-12;eval2=8.92303e-15;eval3=4.82947e-12;eval4=1.46696e-13	CDS	979430	980431	+	LOC_Os01g02790.1:cds_4
chr01	964415	999721	Pindel:CNVnator	SR=8;score=24:eval1=4.57967e-12;eval2=8.92303e-15;eval3=4.82947e-12;eval4=1.46696e-13	gene	984301	986760	-	LOC_Os01g02800
chr01	964415	999721	Pindel:CNVnator	SR=8;score=24:eval1=4.57967e-12;eval2=8.92303e-15;eval3=4.82947e-12;eval4=1.46696e-13	mRNA	984301	986760	-	LOC_Os01g02800.1
chr01	964415	999721	Pindel:CNVnator	SR=8;score=24:eval1=4.57967e-12;eval2=8.92303e-15;eval3=4.82947e-12;eval4=1.46696e-13	exon	986012	986760	-	LOC_Os01g02800.1:exon_1
chr01	964415	999721	Pindel:CNVnator	SR=8;score=24:eval1=4.57967e-12;eval2=8.92303e-15;eval3=4.82947e-12;eval4=1.46696e-13	exon	985753	985922	-	LOC_Os01g02800.1:exon_2
chr01	964415	999721	Pindel:CNVnator	SR=8;score=24:eval1=4.57967e-12;eval2=8.92303e-15;eval3=4.82947e-12;eval4=1.46696e-13	exon	984301	985648	-	LOC_Os01g02800.1:exon_3
chr01	964415	999721	Pindel:CNVnator	SR=8;score=24:eval1=4.57967e-12;eval2=8.92303e-15;eval3=4.82947e-12;eval4=1.46696e-13	CDS	986012	986760	-	LOC_Os01g02800.1:cds_1
chr01	964415	999721	Pindel:CNVnator	SR=8;score=24:eval1=4.57967e-12;eval2=8.92303e-15;eval3=4.82947e-12;eval4=1.46696e-13	CDS	985753	985922	-	LOC_Os01g02800.1:cds_2
chr01	964415	999721	Pindel:CNVnator	SR=8;score=24:eval1=4.57967e-12;eval2=8.92303e-15;eval3=4.82947e-12;eval4=1.46696e-13	CDS	984510	985648	-	LOC_Os01g02800.1:cds_3
chr01	964415	999721	Pindel:CNVnator	SR=8;score=24:eval1=4.57967e-12;eval2=8.92303e-15;eval3=4.82947e-12;eval4=1.46696e-13	three_prime_UTR	984301	984509	-	LOC_Os01g02800.1:utr_1
chr01	964415	999721	Pindel:CNVnator	SR=8;score=24:eval1=4.57967e-12;eval2=8.92303e-15;eval3=4.82947e-12;eval4=1.46696e-13	gene	987591	990647	+	LOC_Os01g02810
chr01	964415	999721	Pindel:CNVnator	SR=8;score=24:eval1=4.57967e-12;eval2=8.92303e-15;eval3=4.82947e-12;eval4=1.46696e-13	mRNA	987591	990647	+	LOC_Os01g02810.1
chr01	964415	999721	Pindel:CNVnator	SR=8;score=24:eval1=4.57967e-12;eval2=8.92303e-15;eval3=4.82947e-12;eval4=1.46696e-13	exon	987591	988419	+	LOC_Os01g02810.1:exon_1
chr01	964415	999721	Pindel:CNVnator	SR=8;score=24:eval1=4.57967e-12;eval2=8.92303e-15;eval3=4.82947e-12;eval4=1.46696e-13	exon	989212	989235	+	LOC_Os01g02810.1:exon_2
chr01	964415	999721	Pindel:CNVnator	SR=8;score=24:eval1=4.57967e-12;eval2=8.92303e-15;eval3=4.82947e-12;eval4=1.46696e-13	exon	989575	990647	+	LOC_Os01g02810.1:exon_3
chr01	964415	999721	Pindel:CNVnator	SR=8;score=24:eval1=4.57967e-12;eval2=8.92303e-15;eval3=4.82947e-12;eval4=1.46696e-13	CDS	987591	988419	+	LOC_Os01g02810.1:cds_1
chr01	964415	999721	Pindel:CNVnator	SR=8;score=24:eval1=4.57967e-12;eval2=8.92303e-15;eval3=4.82947e-12;eval4=1.46696e-13	CDS	989212	989235	+	LOC_Os01g02810.1:cds_2
chr01	964415	999721	Pindel:CNVnator	SR=8;score=24:eval1=4.57967e-12;eval2=8.92303e-15;eval3=4.82947e-12;eval4=1.46696e-13	CDS	989575	990647	+	LOC_Os01g02810.1:cds_3
chr01	964415	999721	Pindel:CNVnator	SR=8;score=24:eval1=4.57967e-12;eval2=8.92303e-15;eval3=4.82947e-12;eval4=1.46696e-13	gene	994710	997262	-	LOC_Os01g02830
chr01	964415	999721	Pindel:CNVnator	SR=8;score=24:eval1=4.57967e-12;eval2=8.92303e-15;eval3=4.82947e-12;eval4=1.46696e-13	mRNA	994710	997262	-	LOC_Os01g02830.1
chr01	964415	999721	Pindel:CNVnator	SR=8;score=24:eval1=4.57967e-12;eval2=8.92303e-15;eval3=4.82947e-12;eval4=1.46696e-13	exon	996412	997262	-	LOC_Os01g02830.1:exon_1
chr01	964415	999721	Pindel:CNVnator	SR=8;score=24:eval1=4.57967e-12;eval2=8.92303e-15;eval3=4.82947e-12;eval4=1.46696e-13	exon	996153	996322	-	LOC_Os01g02830.1:exon_2
chr01	964415	999721	Pindel:CNVnator	SR=8;score=24:eval1=4.57967e-12;eval2=8.92303e-15;eval3=4.82947e-12;eval4=1.46696e-13	exon	994710	996048	-	LOC_Os01g02830.1:exon_3
chr01	964415	999721	Pindel:CNVnator	SR=8;score=24:eval1=4.57967e-12;eval2=8.92303e-15;eval3=4.82947e-12;eval4=1.46696e-13	five_prime_UTR	997224	997262	-	LOC_Os01g02830.1:utr_2
chr01	964415	999721	Pindel:CNVnator	SR=8;score=24:eval1=4.57967e-12;eval2=8.92303e-15;eval3=4.82947e-12;eval4=1.46696e-13	CDS	996412	997223	-	LOC_Os01g02830.1:cds_1
chr01	964415	999721	Pindel:CNVnator	SR=8;score=24:eval1=4.57967e-12;eval2=8.92303e-15;eval3=4.82947e-12;eval4=1.46696e-13	CDS	996153	996322	-	LOC_Os01g02830.1:cds_2
chr01	964415	999721	Pindel:CNVnator	SR=8;score=24:eval1=4.57967e-12;eval2=8.92303e-15;eval3=4.82947e-12;eval4=1.46696e-13	CDS	994910	996048	-	LOC_Os01g02830.1:cds_3
chr01	964415	999721	Pindel:CNVnator	SR=8;score=24:eval1=4.57967e-12;eval2=8.92303e-15;eval3=4.82947e-12;eval4=1.46696e-13	three_prime_UTR	994710	994909	-	LOC_Os01g02830.1:utr_1
chr01	964415	999721	Pindel:CNVnator	SR=8;score=24:eval1=4.57967e-12;eval2=8.92303e-15;eval3=4.82947e-12;eval4=1.46696e-13	gene	997963	1000997	+	LOC_Os01g02840
chr01	964415	999721	Pindel:CNVnator	SR=8;score=24:eval1=4.57967e-12;eval2=8.92303e-15;eval3=4.82947e-12;eval4=1.46696e-13	mRNA	997963	1000997	+	LOC_Os01g02840.1
chr01	964415	999721	Pindel:CNVnator	SR=8;score=24:eval1=4.57967e-12;eval2=8.92303e-15;eval3=4.82947e-12;eval4=1.46696e-13	exon	997963	998749	+	LOC_Os01g02840.1:exon_1
chr01	964415	999721	Pindel:CNVnator	SR=8;score=24:eval1=4.57967e-12;eval2=8.92303e-15;eval3=4.82947e-12;eval4=1.46696e-13	exon	999532	999555	+	LOC_Os01g02840.1:exon_2
chr01	964415	999721	Pindel:CNVnator	SR=8;score=24:eval1=4.57967e-12;eval2=8.92303e-15;eval3=4.82947e-12;eval4=1.46696e-13	CDS	997963	998749	+	LOC_Os01g02840.1:cds_1
chr01	964415	999721	Pindel:CNVnator	SR=8;score=24:eval1=4.57967e-12;eval2=8.92303e-15;eval3=4.82947e-12;eval4=1.46696e-13	CDS	999532	999555	+	LOC_Os01g02840.1:cds_2
chr01	1033184	1033402	BreakDancer:Pindel	score=99;PE=16:SR=4;score=8	NA	NA	NA	NA	NA
chr01	1040245	1040490	BreakDancer:Pindel:SVseq2	score=99;PE=13:SR=14;score=39:SR=5	NA	NA	NA	NA	NA
chr01	1061805	1062793	BreakDancer:Pindel:DELLY:Lumpy	score=99;PE=16:SR=3;score=4:PE=17;SR=0:SU=6	NA	NA	NA	NA	NA
chr01	1093620	1093954	DELLY:Lumpy	PE=5;SR=0:SU=4	NA	NA	NA	NA	NA
chr01	1130865	1131401	BreakDancer:DELLY:SVseq2	score=99;PE=20:PE=19;SR=0:SR=5	NA	NA	NA	NA	NA
chr01	1439446	1443044	BreakDancer:Pindel:DELLY:SVseq2:Lumpy	score=99;PE=14:SR=13;score=50:PE=16;SR=5:SR=4:SU=5	gene	1437163	1445689	+	LOC_Os01g03549
chr01	1439446	1443044	BreakDancer:Pindel:DELLY:SVseq2:Lumpy	score=99;PE=14:SR=13;score=50:PE=16;SR=5:SR=4:SU=5	mRNA	1437163	1445689	+	LOC_Os01g03549.1
chr01	1450559	1483325	BreakDancer:Pindel:DELLY:SVseq2:Lumpy	score=99;PE=15:SR=14;score=63:PE=16;SR=0:SR=5:SU=4	gene	1451477	1454682	+	LOC_Os01g03580
chr01	1450559	1483325	BreakDancer:Pindel:DELLY:SVseq2:Lumpy	score=99;PE=15:SR=14;score=63:PE=16;SR=0:SR=5:SU=4	mRNA	1451477	1454682	+	LOC_Os01g03580.1
chr01	1450559	1483325	BreakDancer:Pindel:DELLY:SVseq2:Lumpy	score=99;PE=15:SR=14;score=63:PE=16;SR=0:SR=5:SU=4	exon	1451477	1452485	+	LOC_Os01g03580.1:exon_1
chr01	1450559	1483325	BreakDancer:Pindel:DELLY:SVseq2:Lumpy	score=99;PE=15:SR=14;score=63:PE=16;SR=0:SR=5:SU=4	exon	1452626	1454330	+	LOC_Os01g03580.1:exon_2
chr01	1450559	1483325	BreakDancer:Pindel:DELLY:SVseq2:Lumpy	score=99;PE=15:SR=14;score=63:PE=16;SR=0:SR=5:SU=4	exon	1454412	1454682	+	LOC_Os01g03580.1:exon_3
chr01	1450559	1483325	BreakDancer:Pindel:DELLY:SVseq2:Lumpy	score=99;PE=15:SR=14;score=63:PE=16;SR=0:SR=5:SU=4	CDS	1451477	1452485	+	LOC_Os01g03580.1:cds_1
chr01	1450559	1483325	BreakDancer:Pindel:DELLY:SVseq2:Lumpy	score=99;PE=15:SR=14;score=63:PE=16;SR=0:SR=5:SU=4	CDS	1452626	1454330	+	LOC_Os01g03580.1:cds_2
chr01	1450559	1483325	BreakDancer:Pindel:DELLY:SVseq2:Lumpy	score=99;PE=15:SR=14;score=63:PE=16;SR=0:SR=5:SU=4	CDS	1454412	1454682	+	LOC_Os01g03580.1:cds_3
chr01	1450559	1483325	BreakDancer:Pindel:DELLY:SVseq2:Lumpy	score=99;PE=15:SR=14;score=63:PE=16;SR=0:SR=5:SU=4	gene	1457947	1459982	+	LOC_Os01g03590
chr01	1450559	1483325	BreakDancer:Pindel:DELLY:SVseq2:Lumpy	score=99;PE=15:SR=14;score=63:PE=16;SR=0:SR=5:SU=4	mRNA	1457947	1459982	+	LOC_Os01g03590.1
chr01	1450559	1483325	BreakDancer:Pindel:DELLY:SVseq2:Lumpy	score=99;PE=15:SR=14;score=63:PE=16;SR=0:SR=5:SU=4	exon	1457947	1458804	+	LOC_Os01g03590.1:exon_1
chr01	1450559	1483325	BreakDancer:Pindel:DELLY:SVseq2:Lumpy	score=99;PE=15:SR=14;score=63:PE=16;SR=0:SR=5:SU=4	exon	1458900	1459041	+	LOC_Os01g03590.1:exon_2
chr01	1450559	1483325	BreakDancer:Pindel:DELLY:SVseq2:Lumpy	score=99;PE=15:SR=14;score=63:PE=16;SR=0:SR=5:SU=4	exon	1459201	1459982	+	LOC_Os01g03590.1:exon_3
chr01	1450559	1483325	BreakDancer:Pindel:DELLY:SVseq2:Lumpy	score=99;PE=15:SR=14;score=63:PE=16;SR=0:SR=5:SU=4	CDS	1457947	1458804	+	LOC_Os01g03590.1:cds_1
chr01	1450559	1483325	BreakDancer:Pindel:DELLY:SVseq2:Lumpy	score=99;PE=15:SR=14;score=63:PE=16;SR=0:SR=5:SU=4	CDS	1458900	1459041	+	LOC_Os01g03590.1:cds_2
chr01	1450559	1483325	BreakDancer:Pindel:DELLY:SVseq2:Lumpy	score=99;PE=15:SR=14;score=63:PE=16;SR=0:SR=5:SU=4	CDS	1459201	1459982	+	LOC_Os01g03590.1:cds_3
chr01	1450559	1483325	BreakDancer:Pindel:DELLY:SVseq2:Lumpy	score=99;PE=15:SR=14;score=63:PE=16;SR=0:SR=5:SU=4	gene	1467735	1471802	-	LOC_Os01g03600
chr01	1450559	1483325	BreakDancer:Pindel:DELLY:SVseq2:Lumpy	score=99;PE=15:SR=14;score=63:PE=16;SR=0:SR=5:SU=4	mRNA	1467735	1471802	-	LOC_Os01g03600.1
chr01	1450559	1483325	BreakDancer:Pindel:DELLY:SVseq2:Lumpy	score=99;PE=15:SR=14;score=63:PE=16;SR=0:SR=5:SU=4	exon	1471716	1471802	-	LOC_Os01g03600.1:exon_1
chr01	1450559	1483325	BreakDancer:Pindel:DELLY:SVseq2:Lumpy	score=99;PE=15:SR=14;score=63:PE=16;SR=0:SR=5:SU=4	exon	1467735	1470320	-	LOC_Os01g03600.1:exon_2
chr01	1450559	1483325	BreakDancer:Pindel:DELLY:SVseq2:Lumpy	score=99;PE=15:SR=14;score=63:PE=16;SR=0:SR=5:SU=4	CDS	1471716	1471802	-	LOC_Os01g03600.1:cds_1
chr01	1450559	1483325	BreakDancer:Pindel:DELLY:SVseq2:Lumpy	score=99;PE=15:SR=14;score=63:PE=16;SR=0:SR=5:SU=4	CDS	1467735	1470320	-	LOC_Os01g03600.1:cds_2
chr01	1450559	1483325	BreakDancer:Pindel:DELLY:SVseq2:Lumpy	score=99;PE=15:SR=14;score=63:PE=16;SR=0:SR=5:SU=4	gene	1474387	1477867	-	LOC_Os01g03610
chr01	1450559	1483325	BreakDancer:Pindel:DELLY:SVseq2:Lumpy	score=99;PE=15:SR=14;score=63:PE=16;SR=0:SR=5:SU=4	mRNA	1474387	1477867	-	LOC_Os01g03610.1
chr01	1450559	1483325	BreakDancer:Pindel:DELLY:SVseq2:Lumpy	score=99;PE=15:SR=14;score=63:PE=16;SR=0:SR=5:SU=4	exon	1477031	1477867	-	LOC_Os01g03610.1:exon_1
chr01	1450559	1483325	BreakDancer:Pindel:DELLY:SVseq2:Lumpy	score=99;PE=15:SR=14;score=63:PE=16;SR=0:SR=5:SU=4	exon	1474387	1476627	-	LOC_Os01g03610.1:exon_2
chr01	1450559	1483325	BreakDancer:Pindel:DELLY:SVseq2:Lumpy	score=99;PE=15:SR=14;score=63:PE=16;SR=0:SR=5:SU=4	CDS	1477031	1477867	-	LOC_Os01g03610.1:cds_1
chr01	1450559	1483325	BreakDancer:Pindel:DELLY:SVseq2:Lumpy	score=99;PE=15:SR=14;score=63:PE=16;SR=0:SR=5:SU=4	CDS	1474387	1476627	-	LOC_Os01g03610.1:cds_2
chr01	1495516	1496158	BreakDancer:DELLY	score=99;PE=9:PE=9;SR=0	NA	NA	NA	NA	NA
chr01	1524174	1531028	BreakDancer:DELLY	score=99;PE=8:PE=10;SR=0	NA	NA	NA	NA	NA
chr01	1708826	1709912	BreakDancer:DELLY:Lumpy	score=99;PE=9:PE=10;SR=0:SU=4	NA	NA	NA	NA	NA
chr01	1794090	1794464	BreakDancer:Pindel:DELLY	score=99;PE=22:SR=11;score=42:PE=22;SR=0	NA	NA	NA	NA	NA
chr01	1969213	1970821	BreakDancer:DELLY:Lumpy	score=99;PE=9:PE=11;SR=0:SU=5	gene	1968323	1970538	-	LOC_Os01g04430
chr01	1969213	1970821	BreakDancer:DELLY:Lumpy	score=99;PE=9:PE=11;SR=0:SU=5	mRNA	1968323	1970538	-	LOC_Os01g04430.1
chr01	1969213	1970821	BreakDancer:DELLY:Lumpy	score=99;PE=9:PE=11;SR=0:SU=5	exon	1970332	1970538	-	LOC_Os01g04430.1:exon_1
chr01	1969213	1970821	BreakDancer:DELLY:Lumpy	score=99;PE=9:PE=11;SR=0:SU=5	CDS	1970332	1970538	-	LOC_Os01g04430.1:cds_1
chr01	1973009	1973661	BreakDancer:Pindel:DELLY:Lumpy	score=99;PE=13:SR=4;score=9:PE=13;SR=0:SU=7	NA	NA	NA	NA	NA
chr01	1978940	1979182	BreakDancer:Pindel	score=99;PE=13:SR=5;score=10	gene	1977423	1982484	-	LOC_Os01g04450
chr01	1978940	1979182	BreakDancer:Pindel	score=99;PE=13:SR=5;score=10	mRNA	1977423	1982484	-	LOC_Os01g04450.1
chr01	1978873	1979210	DELLY:Lumpy	PE=11;SR=0:SU=6	gene	1977423	1982484	-	LOC_Os01g04450
chr01	1978873	1979210	DELLY:Lumpy	PE=11;SR=0:SU=6	mRNA	1977423	1982484	-	LOC_Os01g04450.1
chr01	1978873	1979210	DELLY:Lumpy	PE=11;SR=0:SU=6	exon	1978649	1978909	-	LOC_Os01g04450.1:exon_3
chr01	1978873	1979210	DELLY:Lumpy	PE=11;SR=0:SU=6	CDS	1978649	1978909	-	LOC_Os01g04450.1:cds_3
chr01	1990590	1990987	BreakDancer:DELLY	score=70;PE=3:PE=4;SR=0	gene	1988731	1991248	+	LOC_Os01g04470
chr01	1990590	1990987	BreakDancer:DELLY	score=70;PE=3:PE=4;SR=0	mRNA	1988731	1991248	+	LOC_Os01g04470.1
chr01	2004142	2005557	BreakDancer:Pindel:DELLY:Lumpy	score=99;PE=15:SR=8;score=25:PE=13;SR=0:SU=8	NA	NA	NA	NA	NA
chr01	2005844	2007416	BreakDancer:Pindel:DELLY:Lumpy	score=99;PE=14:SR=7;score=20:PE=13;SR=0:SU=6	gene	2006152	2007254	-	LOC_Os01g04510
chr01	2005844	2007416	BreakDancer:Pindel:DELLY:Lumpy	score=99;PE=14:SR=7;score=20:PE=13;SR=0:SU=6	mRNA	2006152	2007254	-	LOC_Os01g04510.1
chr01	2005844	2007416	BreakDancer:Pindel:DELLY:Lumpy	score=99;PE=14:SR=7;score=20:PE=13;SR=0:SU=6	exon	2007186	2007254	-	LOC_Os01g04510.1:exon_1
chr01	2005844	2007416	BreakDancer:Pindel:DELLY:Lumpy	score=99;PE=14:SR=7;score=20:PE=13;SR=0:SU=6	exon	2006152	2006649	-	LOC_Os01g04510.1:exon_2
chr01	2005844	2007416	BreakDancer:Pindel:DELLY:Lumpy	score=99;PE=14:SR=7;score=20:PE=13;SR=0:SU=6	CDS	2007186	2007254	-	LOC_Os01g04510.1:cds_1
chr01	2005844	2007416	BreakDancer:Pindel:DELLY:Lumpy	score=99;PE=14:SR=7;score=20:PE=13;SR=0:SU=6	CDS	2006152	2006649	-	LOC_Os01g04510.1:cds_2
chr01	2007769	2014502	BreakDancer:Pindel:DELLY:SVseq2	score=88;PE=6:SR=9;score=24:PE=8;SR=0:SR=4	NA	NA	NA	NA	NA
chr01	2041146	2042004	BreakDancer:DELLY:Lumpy	score=99;PE=11:PE=11;SR=0:SU=4	gene	2041300	2042770	+	LOC_Os01g04560
chr01	2041146	2042004	BreakDancer:DELLY:Lumpy	score=99;PE=11:PE=11;SR=0:SU=4	mRNA	2041300	2042770	+	LOC_Os01g04560.1
chr01	2041146	2042004	BreakDancer:DELLY:Lumpy	score=99;PE=11:PE=11;SR=0:SU=4	exon	2041300	2041512	+	LOC_Os01g04560.1:exon_1
chr01	2041146	2042004	BreakDancer:DELLY:Lumpy	score=99;PE=11:PE=11;SR=0:SU=4	exon	2041745	2041858	+	LOC_Os01g04560.1:exon_2
chr01	2041146	2042004	BreakDancer:DELLY:Lumpy	score=99;PE=11:PE=11;SR=0:SU=4	CDS	2041300	2041512	+	LOC_Os01g04560.1:cds_1
chr01	2041146	2042004	BreakDancer:DELLY:Lumpy	score=99;PE=11:PE=11;SR=0:SU=4	CDS	2041745	2041858	+	LOC_Os01g04560.1:cds_2
chr01	2232142	2237512	BreakDancer:Pindel:DELLY	score=99;PE=5:SR=3;score=4:PE=6;SR=0	gene	2233636	2234508	-	LOC_Os01g04850
chr01	2232142	2237512	BreakDancer:Pindel:DELLY	score=99;PE=5:SR=3;score=4:PE=6;SR=0	mRNA	2233636	2234508	-	LOC_Os01g04850.1
chr01	2232142	2237512	BreakDancer:Pindel:DELLY	score=99;PE=5:SR=3;score=4:PE=6;SR=0	exon	2233636	2234508	-	LOC_Os01g04850.1:exon_1
chr01	2232142	2237512	BreakDancer:Pindel:DELLY	score=99;PE=5:SR=3;score=4:PE=6;SR=0	CDS	2233636	2234508	-	LOC_Os01g04850.1:cds_1
chr01	2298644	2306392	BreakDancer:Pindel:DELLY:Lumpy	score=99;PE=10:SR=5;score=6:PE=9;SR=0:SU=4	gene	2299737	2305323	+	LOC_Os01g04960
chr01	2298644	2306392	BreakDancer:Pindel:DELLY:Lumpy	score=99;PE=10:SR=5;score=6:PE=9;SR=0:SU=4	mRNA	2299737	2305323	+	LOC_Os01g04960.1
chr01	2298644	2306392	BreakDancer:Pindel:DELLY:Lumpy	score=99;PE=10:SR=5;score=6:PE=9;SR=0:SU=4	exon	2299737	2301613	+	LOC_Os01g04960.1:exon_1
chr01	2298644	2306392	BreakDancer:Pindel:DELLY:Lumpy	score=99;PE=10:SR=5;score=6:PE=9;SR=0:SU=4	exon	2301884	2302179	+	LOC_Os01g04960.1:exon_2
chr01	2298644	2306392	BreakDancer:Pindel:DELLY:Lumpy	score=99;PE=10:SR=5;score=6:PE=9;SR=0:SU=4	exon	2302556	2302706	+	LOC_Os01g04960.1:exon_3
chr01	2298644	2306392	BreakDancer:Pindel:DELLY:Lumpy	score=99;PE=10:SR=5;score=6:PE=9;SR=0:SU=4	exon	2302779	2303148	+	LOC_Os01g04960.1:exon_4
chr01	2298644	2306392	BreakDancer:Pindel:DELLY:Lumpy	score=99;PE=10:SR=5;score=6:PE=9;SR=0:SU=4	exon	2303233	2303643	+	LOC_Os01g04960.1:exon_5
chr01	2298644	2306392	BreakDancer:Pindel:DELLY:Lumpy	score=99;PE=10:SR=5;score=6:PE=9;SR=0:SU=4	exon	2303737	2304035	+	LOC_Os01g04960.1:exon_6
chr01	2298644	2306392	BreakDancer:Pindel:DELLY:Lumpy	score=99;PE=10:SR=5;score=6:PE=9;SR=0:SU=4	exon	2304112	2304370	+	LOC_Os01g04960.1:exon_7
chr01	2298644	2306392	BreakDancer:Pindel:DELLY:Lumpy	score=99;PE=10:SR=5;score=6:PE=9;SR=0:SU=4	exon	2304463	2304748	+	LOC_Os01g04960.1:exon_8
chr01	2298644	2306392	BreakDancer:Pindel:DELLY:Lumpy	score=99;PE=10:SR=5;score=6:PE=9;SR=0:SU=4	exon	2304839	2304970	+	LOC_Os01g04960.1:exon_9
chr01	2298644	2306392	BreakDancer:Pindel:DELLY:Lumpy	score=99;PE=10:SR=5;score=6:PE=9;SR=0:SU=4	exon	2305031	2305323	+	LOC_Os01g04960.1:exon_10
chr01	2298644	2306392	BreakDancer:Pindel:DELLY:Lumpy	score=99;PE=10:SR=5;score=6:PE=9;SR=0:SU=4	CDS	2299737	2301613	+	LOC_Os01g04960.1:cds_1
chr01	2298644	2306392	BreakDancer:Pindel:DELLY:Lumpy	score=99;PE=10:SR=5;score=6:PE=9;SR=0:SU=4	CDS	2301884	2302179	+	LOC_Os01g04960.1:cds_2
chr01	2298644	2306392	BreakDancer:Pindel:DELLY:Lumpy	score=99;PE=10:SR=5;score=6:PE=9;SR=0:SU=4	CDS	2302556	2302706	+	LOC_Os01g04960.1:cds_3
chr01	2298644	2306392	BreakDancer:Pindel:DELLY:Lumpy	score=99;PE=10:SR=5;score=6:PE=9;SR=0:SU=4	CDS	2302779	2303148	+	LOC_Os01g04960.1:cds_4
chr01	2298644	2306392	BreakDancer:Pindel:DELLY:Lumpy	score=99;PE=10:SR=5;score=6:PE=9;SR=0:SU=4	CDS	2303233	2303643	+	LOC_Os01g04960.1:cds_5
chr01	2298644	2306392	BreakDancer:Pindel:DELLY:Lumpy	score=99;PE=10:SR=5;score=6:PE=9;SR=0:SU=4	CDS	2303737	2304035	+	LOC_Os01g04960.1:cds_6
chr01	2298644	2306392	BreakDancer:Pindel:DELLY:Lumpy	score=99;PE=10:SR=5;score=6:PE=9;SR=0:SU=4	CDS	2304112	2304370	+	LOC_Os01g04960.1:cds_7
chr01	2298644	2306392	BreakDancer:Pindel:DELLY:Lumpy	score=99;PE=10:SR=5;score=6:PE=9;SR=0:SU=4	CDS	2304463	2304748	+	LOC_Os01g04960.1:cds_8
chr01	2298644	2306392	BreakDancer:Pindel:DELLY:Lumpy	score=99;PE=10:SR=5;score=6:PE=9;SR=0:SU=4	CDS	2304839	2304970	+	LOC_Os01g04960.1:cds_9
chr01	2298644	2306392	BreakDancer:Pindel:DELLY:Lumpy	score=99;PE=10:SR=5;score=6:PE=9;SR=0:SU=4	CDS	2305031	2305323	+	LOC_Os01g04960.1:cds_10
chr01	2332446	2332709	BreakDancer:Pindel:SVseq2	score=99;PE=18:SR=7;score=20:SR=6	NA	NA	NA	NA	NA
chr01	2383083	2383454	DELLY:Lumpy	PE=8;SR=0:SU=4	NA	NA	NA	NA	NA
chr01	2458851	2459382	BreakDancer:DELLY:SVseq2	score=99;PE=7:PE=7;SR=0:SR=3	NA	NA	NA	NA	NA
chr01	2593126	2593376	BreakDancer:Pindel	score=99;PE=20:SR=7;score=18	gene	2589537	2593641	-	LOC_Os01g05490
chr01	2593126	2593376	BreakDancer:Pindel	score=99;PE=20:SR=7;score=18	mRNA	2589537	2593641	-	LOC_Os01g05490.1
chr01	2593126	2593376	BreakDancer:Pindel	score=99;PE=20:SR=7;score=18	mRNA	2589537	2593641	-	LOC_Os01g05490.2
chr01	2649460	2649826	BreakDancer:DELLY	score=65;PE=3:PE=4;SR=0	NA	NA	NA	NA	NA
chr01	2731501	2735518	DELLY:Lumpy	PE=5;SR=0:SU=4	gene	2735509	2737830	-	LOC_Os01g05730
chr01	2731501	2735518	DELLY:Lumpy	PE=5;SR=0:SU=4	mRNA	2735509	2737830	-	LOC_Os01g05730.1
chr01	2731501	2735518	DELLY:Lumpy	PE=5;SR=0:SU=4	exon	2735509	2736594	-	LOC_Os01g05730.1:exon_3
chr01	2731501	2735518	DELLY:Lumpy	PE=5;SR=0:SU=4	CDS	2735509	2736594	-	LOC_Os01g05730.1:cds_3
chr01	2753596	2755328	BreakDancer:Pindel:DELLY:SVseq2:Lumpy:softSearch	score=99;PE=16:SR=10;score=27:PE=17;SR=0:SR=7:SU=5:nr=17;sc=6	gene	2753790	2757078	+	LOC_Os01g05770
chr01	2753596	2755328	BreakDancer:Pindel:DELLY:SVseq2:Lumpy:softSearch	score=99;PE=16:SR=10;score=27:PE=17;SR=0:SR=7:SU=5:nr=17;sc=6	exon	2754309	2755079	+	LOC_Os01g05770.1:exon_2
chr01	2753596	2755328	BreakDancer:Pindel:DELLY:SVseq2:Lumpy:softSearch	score=99;PE=16:SR=10;score=27:PE=17;SR=0:SR=7:SU=5:nr=17;sc=6	mRNA	2753790	2757078	+	LOC_Os01g05770.1
chr01	2753596	2755328	BreakDancer:Pindel:DELLY:SVseq2:Lumpy:softSearch	score=99;PE=16:SR=10;score=27:PE=17;SR=0:SR=7:SU=5:nr=17;sc=6	CDS	2753790	2754102	+	LOC_Os01g05770.1:cds_1
chr01	2753596	2755328	BreakDancer:Pindel:DELLY:SVseq2:Lumpy:softSearch	score=99;PE=16:SR=10;score=27:PE=17;SR=0:SR=7:SU=5:nr=17;sc=6	exon	2753790	2754102	+	LOC_Os01g05770.1:exon_1
chr01	2753596	2755328	BreakDancer:Pindel:DELLY:SVseq2:Lumpy:softSearch	score=99;PE=16:SR=10;score=27:PE=17;SR=0:SR=7:SU=5:nr=17;sc=6	CDS	2754309	2755079	+	LOC_Os01g05770.1:cds_2
chr01	2757051	2757638	BreakDancer:Pindel:DELLY	score=88;PE=5:SR=6;score=15:PE=4;SR=0	gene	2753790	2757078	+	LOC_Os01g05770
chr01	2757051	2757638	BreakDancer:Pindel:DELLY	score=88;PE=5:SR=6;score=15:PE=4;SR=0	exon	2756795	2757078	+	LOC_Os01g05770.1:exon_3
chr01	2757051	2757638	BreakDancer:Pindel:DELLY	score=88;PE=5:SR=6;score=15:PE=4;SR=0	mRNA	2753790	2757078	+	LOC_Os01g05770.1
chr01	2757051	2757638	BreakDancer:Pindel:DELLY	score=88;PE=5:SR=6;score=15:PE=4;SR=0	CDS	2756795	2757078	+	LOC_Os01g05770.1:cds_3
chr01	2774620	2775939	BreakDancer:DELLY:SVseq2:Lumpy	score=99;PE=20:PE=18;SR=0:SR=3:SU=5	NA	NA	NA	NA	NA
chr01	2826766	2828334	BreakDancer:Pindel:DELLY:Lumpy:softSearch	score=99;PE=24:SR=9;score=28:PE=26;SR=8:SU=5:nr=28;sc=7	gene	2820036	2838580	-	LOC_Os01g05900
chr01	2826766	2828334	BreakDancer:Pindel:DELLY:Lumpy:softSearch	score=99;PE=24:SR=9;score=28:PE=26;SR=8:SU=5:nr=28;sc=7	mRNA	2820036	2838580	-	LOC_Os01g05900.1
chr01	2855341	2855945	Pindel:DELLY	SR=4;score=8:PE=3;SR=0	gene	2844429	2858134	-	LOC_Os01g05970
chr01	2855341	2855945	Pindel:DELLY	SR=4;score=8:PE=3;SR=0	mRNA	2844429	2858134	-	LOC_Os01g05970.1
chr01	2874308	2874544	BreakDancer:Pindel	score=99;PE=6:SR=8;score=24	NA	NA	NA	NA	NA
chr01	2901268	2901584	BreakDancer:Pindel:DELLY	score=99;PE=17:SR=3;score=6:PE=17;SR=0	NA	NA	NA	NA	NA
chr01	2908468	2920034	Pindel:DELLY	SR=4;score=9:PE=3;SR=0	gene	2910081	2912507	+	LOC_Os01g06100
chr01	2908468	2920034	Pindel:DELLY	SR=4;score=9:PE=3;SR=0	mRNA	2910081	2912507	+	LOC_Os01g06100.1
chr01	2908468	2920034	Pindel:DELLY	SR=4;score=9:PE=3;SR=0	exon	2910081	2912507	+	LOC_Os01g06100.1:exon_1
chr01	2908468	2920034	Pindel:DELLY	SR=4;score=9:PE=3;SR=0	CDS	2910081	2912507	+	LOC_Os01g06100.1:cds_1
chr01	2908468	2920034	Pindel:DELLY	SR=4;score=9:PE=3;SR=0	gene	2912904	2916104	-	LOC_Os01g06110
chr01	2908468	2920034	Pindel:DELLY	SR=4;score=9:PE=3;SR=0	mRNA	2912904	2916104	-	LOC_Os01g06110.1
chr01	2908468	2920034	Pindel:DELLY	SR=4;score=9:PE=3;SR=0	exon	2914843	2916104	-	LOC_Os01g06110.1:exon_1
chr01	2908468	2920034	Pindel:DELLY	SR=4;score=9:PE=3;SR=0	exon	2912904	2914743	-	LOC_Os01g06110.1:exon_2
chr01	2908468	2920034	Pindel:DELLY	SR=4;score=9:PE=3;SR=0	CDS	2914843	2916104	-	LOC_Os01g06110.1:cds_1
chr01	2908468	2920034	Pindel:DELLY	SR=4;score=9:PE=3;SR=0	CDS	2912904	2914743	-	LOC_Os01g06110.1:cds_2
chr01	2961681	2961816	BreakDancer:Pindel	score=99;PE=15:SR=6;score=16	NA	NA	NA	NA	NA
chr01	2989433	2997979	BreakDancer:DELLY:SVseq2	score=99;PE=9:PE=12;SR=0:SR=3	gene	2991397	2997317	-	LOC_Os01g06300
chr01	2989433	2997979	BreakDancer:DELLY:SVseq2	score=99;PE=9:PE=12;SR=0:SR=3	mRNA	2991397	2997317	-	LOC_Os01g06300.1
chr01	2989433	2997979	BreakDancer:DELLY:SVseq2	score=99;PE=9:PE=12;SR=0:SR=3	exon	2995165	2997317	-	LOC_Os01g06300.1:exon_1
chr01	2989433	2997979	BreakDancer:DELLY:SVseq2	score=99;PE=9:PE=12;SR=0:SR=3	exon	2994656	2994936	-	LOC_Os01g06300.1:exon_2
chr01	2989433	2997979	BreakDancer:DELLY:SVseq2	score=99;PE=9:PE=12;SR=0:SR=3	exon	2994035	2994188	-	LOC_Os01g06300.1:exon_3
chr01	2989433	2997979	BreakDancer:DELLY:SVseq2	score=99;PE=9:PE=12;SR=0:SR=3	exon	2993593	2993959	-	LOC_Os01g06300.1:exon_4
chr01	2989433	2997979	BreakDancer:DELLY:SVseq2	score=99;PE=9:PE=12;SR=0:SR=3	exon	2993094	2993507	-	LOC_Os01g06300.1:exon_5
chr01	2989433	2997979	BreakDancer:DELLY:SVseq2	score=99;PE=9:PE=12;SR=0:SR=3	exon	2992715	2993013	-	LOC_Os01g06300.1:exon_6
chr01	2989433	2997979	BreakDancer:DELLY:SVseq2	score=99;PE=9:PE=12;SR=0:SR=3	exon	2992349	2992439	-	LOC_Os01g06300.1:exon_7
chr01	2989433	2997979	BreakDancer:DELLY:SVseq2	score=99;PE=9:PE=12;SR=0:SR=3	exon	2992001	2992256	-	LOC_Os01g06300.1:exon_8
chr01	2989433	2997979	BreakDancer:DELLY:SVseq2	score=99;PE=9:PE=12;SR=0:SR=3	exon	2991863	2991925	-	LOC_Os01g06300.1:exon_9
chr01	2989433	2997979	BreakDancer:DELLY:SVseq2	score=99;PE=9:PE=12;SR=0:SR=3	exon	2991397	2991776	-	LOC_Os01g06300.1:exon_10
chr01	2989433	2997979	BreakDancer:DELLY:SVseq2	score=99;PE=9:PE=12;SR=0:SR=3	CDS	2995165	2997317	-	LOC_Os01g06300.1:cds_1
chr01	2989433	2997979	BreakDancer:DELLY:SVseq2	score=99;PE=9:PE=12;SR=0:SR=3	CDS	2994656	2994936	-	LOC_Os01g06300.1:cds_2
chr01	2989433	2997979	BreakDancer:DELLY:SVseq2	score=99;PE=9:PE=12;SR=0:SR=3	CDS	2994035	2994188	-	LOC_Os01g06300.1:cds_3
chr01	2989433	2997979	BreakDancer:DELLY:SVseq2	score=99;PE=9:PE=12;SR=0:SR=3	CDS	2993593	2993959	-	LOC_Os01g06300.1:cds_4
chr01	2989433	2997979	BreakDancer:DELLY:SVseq2	score=99;PE=9:PE=12;SR=0:SR=3	CDS	2993094	2993507	-	LOC_Os01g06300.1:cds_5
chr01	2989433	2997979	BreakDancer:DELLY:SVseq2	score=99;PE=9:PE=12;SR=0:SR=3	CDS	2992715	2993013	-	LOC_Os01g06300.1:cds_6
chr01	2989433	2997979	BreakDancer:DELLY:SVseq2	score=99;PE=9:PE=12;SR=0:SR=3	CDS	2992349	2992439	-	LOC_Os01g06300.1:cds_7
chr01	2989433	2997979	BreakDancer:DELLY:SVseq2	score=99;PE=9:PE=12;SR=0:SR=3	CDS	2992001	2992256	-	LOC_Os01g06300.1:cds_8
chr01	2989433	2997979	BreakDancer:DELLY:SVseq2	score=99;PE=9:PE=12;SR=0:SR=3	CDS	2991863	2991925	-	LOC_Os01g06300.1:cds_9
chr01	2989433	2997979	BreakDancer:DELLY:SVseq2	score=99;PE=9:PE=12;SR=0:SR=3	CDS	2991397	2991776	-	LOC_Os01g06300.1:cds_10
chr01	3007428	3012338	BreakDancer:DELLY:Lumpy	score=92;PE=5:PE=7;SR=0:SU=5	gene	3010411	3012164	+	LOC_Os01g06330
chr01	3007428	3012338	BreakDancer:DELLY:Lumpy	score=92;PE=5:PE=7;SR=0:SU=5	mRNA	3010411	3012164	+	LOC_Os01g06330.1
chr01	3007428	3012338	BreakDancer:DELLY:Lumpy	score=92;PE=5:PE=7;SR=0:SU=5	exon	3010411	3010928	+	LOC_Os01g06330.1:exon_1
chr01	3007428	3012338	BreakDancer:DELLY:Lumpy	score=92;PE=5:PE=7;SR=0:SU=5	exon	3011143	3011723	+	LOC_Os01g06330.1:exon_2
chr01	3007428	3012338	BreakDancer:DELLY:Lumpy	score=92;PE=5:PE=7;SR=0:SU=5	exon	3011977	3012164	+	LOC_Os01g06330.1:exon_3
chr01	3007428	3012338	BreakDancer:DELLY:Lumpy	score=92;PE=5:PE=7;SR=0:SU=5	CDS	3010411	3010928	+	LOC_Os01g06330.1:cds_1
chr01	3007428	3012338	BreakDancer:DELLY:Lumpy	score=92;PE=5:PE=7;SR=0:SU=5	CDS	3011143	3011723	+	LOC_Os01g06330.1:cds_2
chr01	3007428	3012338	BreakDancer:DELLY:Lumpy	score=92;PE=5:PE=7;SR=0:SU=5	CDS	3011977	3012164	+	LOC_Os01g06330.1:cds_3
chr01	3079772	3082468	BreakDancer:DELLY:CNVnator:SVseq2	score=99;PE=21:PE=21;SR=0:eval1=1.33682e-05;eval2=1.46738e-23;eval3=1776.24;eval4=0.00794529:SR=3	gene	3078707	3082336	+	LOC_Os01g06530
chr01	3079772	3082468	BreakDancer:DELLY:CNVnator:SVseq2	score=99;PE=21:PE=21;SR=0:eval1=1.33682e-05;eval2=1.46738e-23;eval3=1776.24;eval4=0.00794529:SR=3	mRNA	3078707	3082336	+	LOC_Os01g06530.1
chr01	3079772	3082468	BreakDancer:DELLY:CNVnator:SVseq2	score=99;PE=21:PE=21;SR=0:eval1=1.33682e-05;eval2=1.46738e-23;eval3=1776.24;eval4=0.00794529:SR=3	exon	3079547	3082336	+	LOC_Os01g06530.1:exon_2
chr01	3079772	3082468	BreakDancer:DELLY:CNVnator:SVseq2	score=99;PE=21:PE=21;SR=0:eval1=1.33682e-05;eval2=1.46738e-23;eval3=1776.24;eval4=0.00794529:SR=3	CDS	3079547	3082336	+	LOC_Os01g06530.1:cds_2
chr01	3115001	3122071	BreakDancer:DELLY	score=81;PE=4:PE=6;SR=0	gene	3116162	3116902	-	LOC_Os01g06610
chr01	3115001	3122071	BreakDancer:DELLY	score=81;PE=4:PE=6;SR=0	mRNA	3116162	3116902	-	LOC_Os01g06610.1
chr01	3115001	3122071	BreakDancer:DELLY	score=81;PE=4:PE=6;SR=0	exon	3116162	3116902	-	LOC_Os01g06610.1:exon_1
chr01	3115001	3122071	BreakDancer:DELLY	score=81;PE=4:PE=6;SR=0	CDS	3116162	3116902	-	LOC_Os01g06610.1:cds_1
chr01	3130818	3131113	BreakDancer:Pindel:DELLY	score=99;PE=10:SR=3;score=6:PE=10;SR=0	NA	NA	NA	NA	NA
chr01	3138556	3138808	BreakDancer:Pindel	score=91;PE=5:SR=3;score=6	gene	3136104	3140217	-	LOC_Os01g06660
chr01	3138556	3138808	BreakDancer:Pindel	score=91;PE=5:SR=3;score=6	mRNA	3136104	3140217	-	LOC_Os01g06660.1
chr01	3138463	3138814	DELLY:Lumpy	PE=7;SR=0:SU=4	gene	3136104	3140217	-	LOC_Os01g06660
chr01	3138463	3138814	DELLY:Lumpy	PE=7;SR=0:SU=4	mRNA	3136104	3140217	-	LOC_Os01g06660.1
chr01	3141646	3142208	BreakDancer:DELLY	score=80;PE=3:PE=3;SR=0	NA	NA	NA	NA	NA
chr01	3204980	3219110	BreakDancer:Pindel:DELLY:Lumpy	score=99;PE=12:SR=5;score=10:PE=14;SR=0:SU=5	gene	3209141	3215099	+	LOC_Os01g06770
chr01	3204980	3219110	BreakDancer:Pindel:DELLY:Lumpy	score=99;PE=12:SR=5;score=10:PE=14;SR=0:SU=5	mRNA	3209141	3215099	+	LOC_Os01g06770.1
chr01	3204980	3219110	BreakDancer:Pindel:DELLY:Lumpy	score=99;PE=12:SR=5;score=10:PE=14;SR=0:SU=5	exon	3209141	3209977	+	LOC_Os01g06770.1:exon_1
chr01	3204980	3219110	BreakDancer:Pindel:DELLY:Lumpy	score=99;PE=12:SR=5;score=10:PE=14;SR=0:SU=5	exon	3210381	3211206	+	LOC_Os01g06770.1:exon_2
chr01	3204980	3219110	BreakDancer:Pindel:DELLY:Lumpy	score=99;PE=12:SR=5;score=10:PE=14;SR=0:SU=5	exon	3211363	3215099	+	LOC_Os01g06770.1:exon_3
chr01	3204980	3219110	BreakDancer:Pindel:DELLY:Lumpy	score=99;PE=12:SR=5;score=10:PE=14;SR=0:SU=5	CDS	3209141	3209977	+	LOC_Os01g06770.1:cds_1
chr01	3204980	3219110	BreakDancer:Pindel:DELLY:Lumpy	score=99;PE=12:SR=5;score=10:PE=14;SR=0:SU=5	CDS	3210381	3211206	+	LOC_Os01g06770.1:cds_2
chr01	3204980	3219110	BreakDancer:Pindel:DELLY:Lumpy	score=99;PE=12:SR=5;score=10:PE=14;SR=0:SU=5	CDS	3211363	3215099	+	LOC_Os01g06770.1:cds_3
chr01	3204980	3219110	BreakDancer:Pindel:DELLY:Lumpy	score=99;PE=12:SR=5;score=10:PE=14;SR=0:SU=5	gene	3217716	3218279	-	LOC_Os01g06780
chr01	3204980	3219110	BreakDancer:Pindel:DELLY:Lumpy	score=99;PE=12:SR=5;score=10:PE=14;SR=0:SU=5	mRNA	3217716	3218279	-	LOC_Os01g06780.1
chr01	3204980	3219110	BreakDancer:Pindel:DELLY:Lumpy	score=99;PE=12:SR=5;score=10:PE=14;SR=0:SU=5	exon	3218142	3218279	-	LOC_Os01g06780.1:exon_1
chr01	3204980	3219110	BreakDancer:Pindel:DELLY:Lumpy	score=99;PE=12:SR=5;score=10:PE=14;SR=0:SU=5	exon	3217716	3217811	-	LOC_Os01g06780.1:exon_2
chr01	3204980	3219110	BreakDancer:Pindel:DELLY:Lumpy	score=99;PE=12:SR=5;score=10:PE=14;SR=0:SU=5	CDS	3218142	3218279	-	LOC_Os01g06780.1:cds_1
chr01	3204980	3219110	BreakDancer:Pindel:DELLY:Lumpy	score=99;PE=12:SR=5;score=10:PE=14;SR=0:SU=5	CDS	3217716	3217811	-	LOC_Os01g06780.1:cds_2
chr01	3229244	3235896	DELLY:Lumpy	PE=4;SR=0:SU=5	gene	3229084	3229782	-	LOC_Os01g06800
chr01	3229244	3235896	DELLY:Lumpy	PE=4;SR=0:SU=5	mRNA	3229084	3229782	-	LOC_Os01g06800.1
chr01	3229244	3235896	DELLY:Lumpy	PE=4;SR=0:SU=5	exon	3229084	3229782	-	LOC_Os01g06800.1:exon_1
chr01	3229244	3235896	DELLY:Lumpy	PE=4;SR=0:SU=5	CDS	3229084	3229782	-	LOC_Os01g06800.1:cds_1
chr01	3229244	3235896	DELLY:Lumpy	PE=4;SR=0:SU=5	gene	3230885	3235268	-	LOC_Os01g06810
chr01	3229244	3235896	DELLY:Lumpy	PE=4;SR=0:SU=5	mRNA	3230885	3235268	-	LOC_Os01g06810.1
chr01	3229244	3235896	DELLY:Lumpy	PE=4;SR=0:SU=5	exon	3233868	3235268	-	LOC_Os01g06810.1:exon_1
chr01	3229244	3235896	DELLY:Lumpy	PE=4;SR=0:SU=5	exon	3233771	3233831	-	LOC_Os01g06810.1:exon_2
chr01	3229244	3235896	DELLY:Lumpy	PE=4;SR=0:SU=5	exon	3230885	3233409	-	LOC_Os01g06810.1:exon_3
chr01	3229244	3235896	DELLY:Lumpy	PE=4;SR=0:SU=5	CDS	3233868	3235268	-	LOC_Os01g06810.1:cds_1
chr01	3229244	3235896	DELLY:Lumpy	PE=4;SR=0:SU=5	CDS	3233771	3233831	-	LOC_Os01g06810.1:cds_2
chr01	3229244	3235896	DELLY:Lumpy	PE=4;SR=0:SU=5	CDS	3230885	3233409	-	LOC_Os01g06810.1:cds_3
chr01	3237727	3238625	BreakDancer:Pindel:DELLY:SVseq2:Lumpy	score=99;PE=18:SR=9;score=28:PE=18;SR=5:SR=4:SU=5	gene	3235987	3237799	+	LOC_Os01g06820
chr01	3237727	3238625	BreakDancer:Pindel:DELLY:SVseq2:Lumpy	score=99;PE=18:SR=9;score=28:PE=18;SR=5:SR=4:SU=5	mRNA	3235987	3237799	+	LOC_Os01g06820.1
chr01	3237727	3238625	BreakDancer:Pindel:DELLY:SVseq2:Lumpy	score=99;PE=18:SR=9;score=28:PE=18;SR=5:SR=4:SU=5	exon	3237744	3237799	+	LOC_Os01g06820.1:exon_2
chr01	3237727	3238625	BreakDancer:Pindel:DELLY:SVseq2:Lumpy	score=99;PE=18:SR=9;score=28:PE=18;SR=5:SR=4:SU=5	CDS	3237744	3237799	+	LOC_Os01g06820.1:cds_2
chr01	3266022	3269434	DELLY:Lumpy	PE=3;SR=0:SU=4	NA	NA	NA	NA	NA
chr01	3310345	3312335	BreakDancer:Pindel:DELLY:Lumpy	score=99;PE=16:SR=12;score=40:PE=16;SR=6:SU=4	NA	NA	NA	NA	NA
chr01	3380273	3380621	BreakDancer:DELLY:SVseq2	score=99;PE=18:PE=17;SR=0:SR=4	NA	NA	NA	NA	NA
chr01	3403484	3403708	BreakDancer:Pindel	score=99;PE=25:SR=6;score=15	gene	3401288	3407358	+	LOC_Os01g07212
chr01	3403484	3403708	BreakDancer:Pindel	score=99;PE=25:SR=6;score=15	mRNA	3401288	3407358	+	LOC_Os01g07212.1
chr01	3416329	3416994	BreakDancer:Pindel:DELLY:Lumpy	score=99;PE=14:SR=4;score=9:PE=14;SR=0:SU=4	NA	NA	NA	NA	NA
chr01	3616852	3617494	BreakDancer:Pindel:DELLY:Lumpy	score=99;PE=21:SR=7;score=20:PE=17;SR=0:SU=6	gene	3616498	3619216	-	LOC_Os01g07550
chr01	3616852	3617494	BreakDancer:Pindel:DELLY:Lumpy	score=99;PE=21:SR=7;score=20:PE=17;SR=0:SU=6	mRNA	3616498	3619216	-	LOC_Os01g07550.1
chr01	3616852	3617494	BreakDancer:Pindel:DELLY:Lumpy	score=99;PE=21:SR=7;score=20:PE=17;SR=0:SU=6	exon	3616928	3617131	-	LOC_Os01g07550.1:exon_3
chr01	3616852	3617494	BreakDancer:Pindel:DELLY:Lumpy	score=99;PE=21:SR=7;score=20:PE=17;SR=0:SU=6	CDS	3616928	3617131	-	LOC_Os01g07550.1:cds_3
chr01	3640284	3640643	BreakDancer:Pindel:DELLY	score=99;PE=18:SR=4;score=8:PE=16;SR=0	NA	NA	NA	NA	NA
chr01	3651369	3652234	BreakDancer:DELLY:Lumpy	score=99;PE=4:PE=4;SR=0:SU=4	NA	NA	NA	NA	NA
chr01	3748466	3759622	BreakDancer:Pindel:DELLY:SVseq2:Lumpy	score=99;PE=16:SR=10;score=27:PE=18;SR=5:SR=3:SU=7	gene	3748865	3752620	-	LOC_Os01g07820
chr01	3748466	3759622	BreakDancer:Pindel:DELLY:SVseq2:Lumpy	score=99;PE=16:SR=10;score=27:PE=18;SR=5:SR=3:SU=7	mRNA	3748865	3752620	-	LOC_Os01g07820.1
chr01	3748466	3759622	BreakDancer:Pindel:DELLY:SVseq2:Lumpy	score=99;PE=16:SR=10;score=27:PE=18;SR=5:SR=3:SU=7	exon	3751199	3752620	-	LOC_Os01g07820.1:exon_1
chr01	3748466	3759622	BreakDancer:Pindel:DELLY:SVseq2:Lumpy	score=99;PE=16:SR=10;score=27:PE=18;SR=5:SR=3:SU=7	exon	3750028	3751124	-	LOC_Os01g07820.1:exon_2
chr01	3748466	3759622	BreakDancer:Pindel:DELLY:SVseq2:Lumpy	score=99;PE=16:SR=10;score=27:PE=18;SR=5:SR=3:SU=7	exon	3749745	3749918	-	LOC_Os01g07820.1:exon_3
chr01	3748466	3759622	BreakDancer:Pindel:DELLY:SVseq2:Lumpy	score=99;PE=16:SR=10;score=27:PE=18;SR=5:SR=3:SU=7	exon	3749538	3749648	-	LOC_Os01g07820.1:exon_4
chr01	3748466	3759622	BreakDancer:Pindel:DELLY:SVseq2:Lumpy	score=99;PE=16:SR=10;score=27:PE=18;SR=5:SR=3:SU=7	exon	3749381	3749453	-	LOC_Os01g07820.1:exon_5
chr01	3748466	3759622	BreakDancer:Pindel:DELLY:SVseq2:Lumpy	score=99;PE=16:SR=10;score=27:PE=18;SR=5:SR=3:SU=7	exon	3749188	3749286	-	LOC_Os01g07820.1:exon_6
chr01	3748466	3759622	BreakDancer:Pindel:DELLY:SVseq2:Lumpy	score=99;PE=16:SR=10;score=27:PE=18;SR=5:SR=3:SU=7	exon	3748865	3749108	-	LOC_Os01g07820.1:exon_7
chr01	3748466	3759622	BreakDancer:Pindel:DELLY:SVseq2:Lumpy	score=99;PE=16:SR=10;score=27:PE=18;SR=5:SR=3:SU=7	CDS	3751199	3752620	-	LOC_Os01g07820.1:cds_1
chr01	3748466	3759622	BreakDancer:Pindel:DELLY:SVseq2:Lumpy	score=99;PE=16:SR=10;score=27:PE=18;SR=5:SR=3:SU=7	CDS	3750028	3751124	-	LOC_Os01g07820.1:cds_2
chr01	3748466	3759622	BreakDancer:Pindel:DELLY:SVseq2:Lumpy	score=99;PE=16:SR=10;score=27:PE=18;SR=5:SR=3:SU=7	CDS	3749745	3749918	-	LOC_Os01g07820.1:cds_3
chr01	3748466	3759622	BreakDancer:Pindel:DELLY:SVseq2:Lumpy	score=99;PE=16:SR=10;score=27:PE=18;SR=5:SR=3:SU=7	CDS	3749538	3749648	-	LOC_Os01g07820.1:cds_4
chr01	3748466	3759622	BreakDancer:Pindel:DELLY:SVseq2:Lumpy	score=99;PE=16:SR=10;score=27:PE=18;SR=5:SR=3:SU=7	CDS	3749381	3749453	-	LOC_Os01g07820.1:cds_5
chr01	3748466	3759622	BreakDancer:Pindel:DELLY:SVseq2:Lumpy	score=99;PE=16:SR=10;score=27:PE=18;SR=5:SR=3:SU=7	CDS	3749188	3749286	-	LOC_Os01g07820.1:cds_6
chr01	3748466	3759622	BreakDancer:Pindel:DELLY:SVseq2:Lumpy	score=99;PE=16:SR=10;score=27:PE=18;SR=5:SR=3:SU=7	CDS	3748923	3749108	-	LOC_Os01g07820.1:cds_7
chr01	3748466	3759622	BreakDancer:Pindel:DELLY:SVseq2:Lumpy	score=99;PE=16:SR=10;score=27:PE=18;SR=5:SR=3:SU=7	three_prime_UTR	3748865	3748922	-	LOC_Os01g07820.1:utr_1
chr01	3748466	3759622	BreakDancer:Pindel:DELLY:SVseq2:Lumpy	score=99;PE=16:SR=10;score=27:PE=18;SR=5:SR=3:SU=7	gene	3755288	3758620	-	LOC_Os01g07830
chr01	3748466	3759622	BreakDancer:Pindel:DELLY:SVseq2:Lumpy	score=99;PE=16:SR=10;score=27:PE=18;SR=5:SR=3:SU=7	mRNA	3755288	3758620	-	LOC_Os01g07830.1
chr01	3748466	3759622	BreakDancer:Pindel:DELLY:SVseq2:Lumpy	score=99;PE=16:SR=10;score=27:PE=18;SR=5:SR=3:SU=7	exon	3756022	3758620	-	LOC_Os01g07830.1:exon_1
chr01	3748466	3759622	BreakDancer:Pindel:DELLY:SVseq2:Lumpy	score=99;PE=16:SR=10;score=27:PE=18;SR=5:SR=3:SU=7	exon	3755288	3755841	-	LOC_Os01g07830.1:exon_2
chr01	3748466	3759622	BreakDancer:Pindel:DELLY:SVseq2:Lumpy	score=99;PE=16:SR=10;score=27:PE=18;SR=5:SR=3:SU=7	CDS	3756022	3758620	-	LOC_Os01g07830.1:cds_1
chr01	3748466	3759622	BreakDancer:Pindel:DELLY:SVseq2:Lumpy	score=99;PE=16:SR=10;score=27:PE=18;SR=5:SR=3:SU=7	CDS	3755288	3755841	-	LOC_Os01g07830.1:cds_2
chr01	3774782	3776862	BreakDancer:Pindel:DELLY:Lumpy	score=99;PE=17:SR=4;score=8:PE=16;SR=0:SU=7	NA	NA	NA	NA	NA
chr01	3800256	3801280	BreakDancer:DELLY	score=72;PE=4:PE=5;SR=0	NA	NA	NA	NA	NA
chr01	3813627	3813986	DELLY:Lumpy	PE=5;SR=0:SU=4	NA	NA	NA	NA	NA
chr01	3828800	3829209	BreakDancer:Pindel:DELLY	score=99;PE=13:SR=5;score=12:PE=12;SR=0	gene	3827039	3830347	-	LOC_Os01g07920
chr01	3828800	3829209	BreakDancer:Pindel:DELLY	score=99;PE=13:SR=5;score=12:PE=12;SR=0	mRNA	3827039	3830326	-	LOC_Os01g07920.1
chr01	3828800	3829209	BreakDancer:Pindel:DELLY	score=99;PE=13:SR=5;score=12:PE=12;SR=0	mRNA	3827042	3830347	-	LOC_Os01g07920.2
chr01	3834042	3834286	BreakDancer:Pindel	score=99;PE=5:SR=3;score=6	NA	NA	NA	NA	NA
chr01	3837696	3838103	BreakDancer:Pindel:DELLY	score=99;PE=22:SR=7;score=18:PE=23;SR=0	gene	3835129	3838211	-	LOC_Os01g07940
chr01	3837696	3838103	BreakDancer:Pindel:DELLY	score=99;PE=22:SR=7;score=18:PE=23;SR=0	mRNA	3835129	3838211	-	LOC_Os01g07940.1
chr01	3837696	3838103	BreakDancer:Pindel:DELLY	score=99;PE=22:SR=7;score=18:PE=23;SR=0	exon	3836992	3838211	-	LOC_Os01g07940.1:exon_1
chr01	3837696	3838103	BreakDancer:Pindel:DELLY	score=99;PE=22:SR=7;score=18:PE=23;SR=0	five_prime_UTR	3837573	3838211	-	LOC_Os01g07940.1:utr_2
chr01	3861604	3871714	BreakDancer:DELLY	score=99;PE=11:PE=10;SR=0	gene	3858824	3861839	-	LOC_Os01g07980
chr01	3861604	3871714	BreakDancer:DELLY	score=99;PE=11:PE=10;SR=0	mRNA	3858824	3861839	-	LOC_Os01g07980.1
chr01	3861604	3871714	BreakDancer:DELLY	score=99;PE=11:PE=10;SR=0	exon	3861759	3861839	-	LOC_Os01g07980.1:exon_1
chr01	3861604	3871714	BreakDancer:DELLY	score=99;PE=11:PE=10;SR=0	CDS	3861759	3861839	-	LOC_Os01g07980.1:cds_1
chr01	3861604	3871714	BreakDancer:DELLY	score=99;PE=11:PE=10;SR=0	gene	3864260	3868543	+	LOC_Os01g07990
chr01	3861604	3871714	BreakDancer:DELLY	score=99;PE=11:PE=10;SR=0	mRNA	3864260	3868543	+	LOC_Os01g07990.1
chr01	3861604	3871714	BreakDancer:DELLY	score=99;PE=11:PE=10;SR=0	exon	3864260	3868543	+	LOC_Os01g07990.1:exon_1
chr01	3861604	3871714	BreakDancer:DELLY	score=99;PE=11:PE=10;SR=0	CDS	3864260	3868543	+	LOC_Os01g07990.1:cds_1
chr01	3861604	3871714	BreakDancer:DELLY	score=99;PE=11:PE=10;SR=0	gene	3870734	3874321	-	LOC_Os01g08000
chr01	3861604	3871714	BreakDancer:DELLY	score=99;PE=11:PE=10;SR=0	mRNA	3870734	3874321	-	LOC_Os01g08000.2
chr01	3861604	3871714	BreakDancer:DELLY	score=99;PE=11:PE=10;SR=0	exon	3870734	3871461	-	LOC_Os01g08000.2:exon_6
chr01	3861604	3871714	BreakDancer:DELLY	score=99;PE=11:PE=10;SR=0	CDS	3871444	3871461	-	LOC_Os01g08000.2:cds_6
chr01	3861604	3871714	BreakDancer:DELLY	score=99;PE=11:PE=10;SR=0	three_prime_UTR	3870734	3871443	-	LOC_Os01g08000.2:utr_1
chr01	3911017	3911260	BreakDancer:Pindel	score=99;PE=14:SR=5;score=10	NA	NA	NA	NA	NA
chr01	3911935	3912681	BreakDancer:Pindel:DELLY:SVseq2	score=99;PE=7:SR=6;score=16:PE=10;SR=5:SR=3	NA	NA	NA	NA	NA
chr01	3956583	3956704	BreakDancer:SVseq2:softSearch	score=99;PE=10:SR=3:nr=11;sc=6	NA	NA	NA	NA	NA
chr01	3998310	3998577	Pindel:DELLY	SR=4;score=5:PE=0;SR=6	NA	NA	NA	NA	NA
chr01	4058456	4058982	BreakDancer:DELLY	score=99;PE=15:PE=16;SR=0	NA	NA	NA	NA	NA
chr01	4095853	4096472	BreakDancer:DELLY	score=99;PE=6:PE=9;SR=0	gene	4095856	4096249	+	LOC_Os01g08350
chr01	4095853	4096472	BreakDancer:DELLY	score=99;PE=6:PE=9;SR=0	mRNA	4095856	4096249	+	LOC_Os01g08350.1
chr01	4095853	4096472	BreakDancer:DELLY	score=99;PE=6:PE=9;SR=0	exon	4095856	4096117	+	LOC_Os01g08350.1:exon_1
chr01	4095853	4096472	BreakDancer:DELLY	score=99;PE=6:PE=9;SR=0	exon	4096161	4096249	+	LOC_Os01g08350.1:exon_2
chr01	4095853	4096472	BreakDancer:DELLY	score=99;PE=6:PE=9;SR=0	CDS	4095856	4096117	+	LOC_Os01g08350.1:cds_1
chr01	4095853	4096472	BreakDancer:DELLY	score=99;PE=6:PE=9;SR=0	CDS	4096161	4096249	+	LOC_Os01g08350.1:cds_2
chr01	4186267	4192639	BreakDancer:DELLY	score=66;PE=3:PE=4;SR=0	gene	4187493	4191715	-	LOC_Os01g08480
chr01	4186267	4192639	BreakDancer:DELLY	score=66;PE=3:PE=4;SR=0	mRNA	4187493	4191715	-	LOC_Os01g08480.1
chr01	4186267	4192639	BreakDancer:DELLY	score=66;PE=3:PE=4;SR=0	exon	4188020	4191715	-	LOC_Os01g08480.1:exon_1
chr01	4186267	4192639	BreakDancer:DELLY	score=66;PE=3:PE=4;SR=0	exon	4187811	4187972	-	LOC_Os01g08480.1:exon_2
chr01	4186267	4192639	BreakDancer:DELLY	score=66;PE=3:PE=4;SR=0	exon	4187493	4187597	-	LOC_Os01g08480.1:exon_3
chr01	4186267	4192639	BreakDancer:DELLY	score=66;PE=3:PE=4;SR=0	CDS	4188020	4191715	-	LOC_Os01g08480.1:cds_1
chr01	4186267	4192639	BreakDancer:DELLY	score=66;PE=3:PE=4;SR=0	CDS	4187811	4187972	-	LOC_Os01g08480.1:cds_2
chr01	4186267	4192639	BreakDancer:DELLY	score=66;PE=3:PE=4;SR=0	CDS	4187493	4187597	-	LOC_Os01g08480.1:cds_3
chr01	4195199	4195446	BreakDancer:Pindel	score=99;PE=6:SR=5;score=10	NA	NA	NA	NA	NA
chr01	4285010	4285285	BreakDancer:Pindel:DELLY:SVseq2	score=99;PE=9:SR=7;score=18:PE=0;SR=5:SR=7	gene	4284626	4288083	+	LOC_Os01g08610
chr01	4285010	4285285	BreakDancer:Pindel:DELLY:SVseq2	score=99;PE=9:SR=7;score=18:PE=0;SR=5:SR=7	mRNA	4284626	4288083	+	LOC_Os01g08610.1
chr01	4338962	4339190	BreakDancer:Pindel:SVseq2	score=99;PE=22:SR=7;score=20:SR=3	NA	NA	NA	NA	NA
chr01	4412742	4412940	BreakDancer:Pindel	score=99;PE=12:SR=3;score=6	NA	NA	NA	NA	NA
chr01	4504357	4506855	BreakDancer:Pindel:DELLY:Lumpy	score=99;PE=11:SR=4;score=8:PE=12;SR=0:SU=5	gene	4497719	4504407	+	LOC_Os01g08970
chr01	4504357	4506855	BreakDancer:Pindel:DELLY:Lumpy	score=99;PE=11:SR=4;score=8:PE=12;SR=0:SU=5	mRNA	4497719	4504407	+	LOC_Os01g08970.1
chr01	4504357	4506855	BreakDancer:Pindel:DELLY:Lumpy	score=99;PE=11:SR=4;score=8:PE=12;SR=0:SU=5	exon	4503870	4504407	+	LOC_Os01g08970.1:exon_16
chr01	4504357	4506855	BreakDancer:Pindel:DELLY:Lumpy	score=99;PE=11:SR=4;score=8:PE=12;SR=0:SU=5	three_prime_UTR	4504001	4504407	+	LOC_Os01g08970.1:utr_2
chr01	4504357	4506855	BreakDancer:Pindel:DELLY:Lumpy	score=99;PE=11:SR=4;score=8:PE=12;SR=0:SU=5	mRNA	4497719	4504386	+	LOC_Os01g08970.2
chr01	4504357	4506855	BreakDancer:Pindel:DELLY:Lumpy	score=99;PE=11:SR=4;score=8:PE=12;SR=0:SU=5	exon	4503870	4504386	+	LOC_Os01g08970.2:exon_15
chr01	4504357	4506855	BreakDancer:Pindel:DELLY:Lumpy	score=99;PE=11:SR=4;score=8:PE=12;SR=0:SU=5	three_prime_UTR	4504001	4504386	+	LOC_Os01g08970.2:utr_4
chr01	4504357	4506855	BreakDancer:Pindel:DELLY:Lumpy	score=99;PE=11:SR=4;score=8:PE=12;SR=0:SU=5	gene	4504620	4505211	-	LOC_Os01g08980
chr01	4504357	4506855	BreakDancer:Pindel:DELLY:Lumpy	score=99;PE=11:SR=4;score=8:PE=12;SR=0:SU=5	mRNA	4504620	4505211	-	LOC_Os01g08980.1
chr01	4504357	4506855	BreakDancer:Pindel:DELLY:Lumpy	score=99;PE=11:SR=4;score=8:PE=12;SR=0:SU=5	exon	4504620	4505211	-	LOC_Os01g08980.1:exon_1
chr01	4504357	4506855	BreakDancer:Pindel:DELLY:Lumpy	score=99;PE=11:SR=4;score=8:PE=12;SR=0:SU=5	five_prime_UTR	4505061	4505211	-	LOC_Os01g08980.1:utr_1
chr01	4504357	4506855	BreakDancer:Pindel:DELLY:Lumpy	score=99;PE=11:SR=4;score=8:PE=12;SR=0:SU=5	CDS	4504620	4505060	-	LOC_Os01g08980.1:cds_1
chr01	4549575	4560488	BreakDancer:Pindel:DELLY	score=99;PE=21:SR=11;score=42:PE=20;SR=0	gene	4551112	4554640	-	LOC_Os01g09050
chr01	4549575	4560488	BreakDancer:Pindel:DELLY	score=99;PE=21:SR=11;score=42:PE=20;SR=0	mRNA	4551112	4554640	-	LOC_Os01g09050.1
chr01	4549575	4560488	BreakDancer:Pindel:DELLY	score=99;PE=21:SR=11;score=42:PE=20;SR=0	exon	4554533	4554640	-	LOC_Os01g09050.1:exon_1
chr01	4549575	4560488	BreakDancer:Pindel:DELLY	score=99;PE=21:SR=11;score=42:PE=20;SR=0	exon	4554092	4554499	-	LOC_Os01g09050.1:exon_2
chr01	4549575	4560488	BreakDancer:Pindel:DELLY	score=99;PE=21:SR=11;score=42:PE=20;SR=0	exon	4553387	4554055	-	LOC_Os01g09050.1:exon_3
chr01	4549575	4560488	BreakDancer:Pindel:DELLY	score=99;PE=21:SR=11;score=42:PE=20;SR=0	exon	4551112	4553247	-	LOC_Os01g09050.1:exon_4
chr01	4549575	4560488	BreakDancer:Pindel:DELLY	score=99;PE=21:SR=11;score=42:PE=20;SR=0	CDS	4554533	4554640	-	LOC_Os01g09050.1:cds_1
chr01	4549575	4560488	BreakDancer:Pindel:DELLY	score=99;PE=21:SR=11;score=42:PE=20;SR=0	CDS	4554092	4554499	-	LOC_Os01g09050.1:cds_2
chr01	4549575	4560488	BreakDancer:Pindel:DELLY	score=99;PE=21:SR=11;score=42:PE=20;SR=0	CDS	4553387	4554055	-	LOC_Os01g09050.1:cds_3
chr01	4549575	4560488	BreakDancer:Pindel:DELLY	score=99;PE=21:SR=11;score=42:PE=20;SR=0	CDS	4551112	4553247	-	LOC_Os01g09050.1:cds_4
chr01	4549575	4560488	BreakDancer:Pindel:DELLY	score=99;PE=21:SR=11;score=42:PE=20;SR=0	gene	4559006	4559950	-	LOC_Os01g09060
chr01	4549575	4560488	BreakDancer:Pindel:DELLY	score=99;PE=21:SR=11;score=42:PE=20;SR=0	mRNA	4559006	4559950	-	LOC_Os01g09060.1
chr01	4549575	4560488	BreakDancer:Pindel:DELLY	score=99;PE=21:SR=11;score=42:PE=20;SR=0	exon	4559006	4559950	-	LOC_Os01g09060.1:exon_1
chr01	4549575	4560488	BreakDancer:Pindel:DELLY	score=99;PE=21:SR=11;score=42:PE=20;SR=0	CDS	4559006	4559950	-	LOC_Os01g09060.1:cds_1
chr01	4638939	4645106	BreakDancer:Pindel:DELLY:CNVnator:Lumpy	score=99;PE=17:SR=6;score=15:PE=16;SR=0:eval1=5.27743e-05;eval2=138464;eval3=0.189744;eval4=2369620:SU=4	gene	4642301	4643110	-	LOC_Os01g09206
chr01	4638939	4645106	BreakDancer:Pindel:DELLY:CNVnator:Lumpy	score=99;PE=17:SR=6;score=15:PE=16;SR=0:eval1=5.27743e-05;eval2=138464;eval3=0.189744;eval4=2369620:SU=4	mRNA	4642301	4643110	-	LOC_Os01g09206.1
chr01	4638939	4645106	BreakDancer:Pindel:DELLY:CNVnator:Lumpy	score=99;PE=17:SR=6;score=15:PE=16;SR=0:eval1=5.27743e-05;eval2=138464;eval3=0.189744;eval4=2369620:SU=4	exon	4642301	4643110	-	LOC_Os01g09206.1:exon_1
chr01	4638939	4645106	BreakDancer:Pindel:DELLY:CNVnator:Lumpy	score=99;PE=17:SR=6;score=15:PE=16;SR=0:eval1=5.27743e-05;eval2=138464;eval3=0.189744;eval4=2369620:SU=4	CDS	4642301	4643110	-	LOC_Os01g09206.1:cds_1
chr01	4638939	4645106	BreakDancer:Pindel:DELLY:CNVnator:Lumpy	score=99;PE=17:SR=6;score=15:PE=16;SR=0:eval1=5.27743e-05;eval2=138464;eval3=0.189744;eval4=2369620:SU=4	gene	4644061	4644696	-	LOC_Os01g09212
chr01	4638939	4645106	BreakDancer:Pindel:DELLY:CNVnator:Lumpy	score=99;PE=17:SR=6;score=15:PE=16;SR=0:eval1=5.27743e-05;eval2=138464;eval3=0.189744;eval4=2369620:SU=4	mRNA	4644061	4644696	-	LOC_Os01g09212.1
chr01	4638939	4645106	BreakDancer:Pindel:DELLY:CNVnator:Lumpy	score=99;PE=17:SR=6;score=15:PE=16;SR=0:eval1=5.27743e-05;eval2=138464;eval3=0.189744;eval4=2369620:SU=4	exon	4644061	4644696	-	LOC_Os01g09212.1:exon_1
chr01	4638939	4645106	BreakDancer:Pindel:DELLY:CNVnator:Lumpy	score=99;PE=17:SR=6;score=15:PE=16;SR=0:eval1=5.27743e-05;eval2=138464;eval3=0.189744;eval4=2369620:SU=4	CDS	4644061	4644696	-	LOC_Os01g09212.1:cds_1
chr01	4667739	4668009	BreakDancer:Pindel:SVseq2	score=99;PE=13:SR=8;score=24:SR=3	NA	NA	NA	NA	NA
chr01	4758932	4759541	BreakDancer:DELLY:Lumpy	score=99;PE=7:PE=7;SR=0:SU=4	gene	4758725	4758988	-	LOC_Os01g09350
chr01	4758932	4759541	BreakDancer:DELLY:Lumpy	score=99;PE=7:PE=7;SR=0:SU=4	mRNA	4758725	4758988	-	LOC_Os01g09350.1
chr01	4758932	4759541	BreakDancer:DELLY:Lumpy	score=99;PE=7:PE=7;SR=0:SU=4	exon	4758725	4758988	-	LOC_Os01g09350.1:exon_1
chr01	4758932	4759541	BreakDancer:DELLY:Lumpy	score=99;PE=7:PE=7;SR=0:SU=4	CDS	4758725	4758988	-	LOC_Os01g09350.1:cds_1
chr01	4776217	4781951	BreakDancer:Pindel:DELLY:SVseq2:Lumpy	score=99;PE=18:SR=8;score=21:PE=16;SR=0:SR=4:SU=4	gene	4768735	4782706	-	LOC_Os01g09384
chr01	4776217	4781951	BreakDancer:Pindel:DELLY:SVseq2:Lumpy	score=99;PE=18:SR=8;score=21:PE=16;SR=0:SR=4:SU=4	mRNA	4768735	4782706	-	LOC_Os01g09384.1
chr01	4796589	4796938	Pindel:DELLY	SR=5;score=12:PE=7;SR=0	gene	4796155	4798479	-	LOC_Os01g09420
chr01	4796589	4796938	Pindel:DELLY	SR=5;score=12:PE=7;SR=0	mRNA	4796155	4798479	-	LOC_Os01g09420.1
chr01	4796589	4796938	Pindel:DELLY	SR=5;score=12:PE=7;SR=0	exon	4796897	4798479	-	LOC_Os01g09420.1:exon_1
chr01	4796589	4796938	Pindel:DELLY	SR=5;score=12:PE=7;SR=0	CDS	4796897	4798365	-	LOC_Os01g09420.1:cds_1
chr01	4806624	4806904	BreakDancer:DELLY	score=97;PE=4:PE=6;SR=0	NA	NA	NA	NA	NA
chr01	4807718	4809564	BreakDancer:DELLY	score=99;PE=13:PE=12;SR=0	gene	4807985	4808500	+	LOC_Os01g09440
chr01	4807718	4809564	BreakDancer:DELLY	score=99;PE=13:PE=12;SR=0	mRNA	4807985	4808500	+	LOC_Os01g09440.1
chr01	4807718	4809564	BreakDancer:DELLY	score=99;PE=13:PE=12;SR=0	exon	4807985	4808500	+	LOC_Os01g09440.1:exon_1
chr01	4807718	4809564	BreakDancer:DELLY	score=99;PE=13:PE=12;SR=0	CDS	4807985	4808500	+	LOC_Os01g09440.1:cds_1
chr01	4815974	4816113	BreakDancer:Pindel	score=99;PE=8:SR=5;score=6	NA	NA	NA	NA	NA
chr01	4839488	4846251	BreakDancer:Pindel:DELLY:Lumpy	score=99;PE=14:SR=8;score=24:PE=13;SR=0:SU=4	gene	4840354	4845339	+	LOC_Os01g09490
chr01	4839488	4846251	BreakDancer:Pindel:DELLY:Lumpy	score=99;PE=14:SR=8;score=24:PE=13;SR=0:SU=4	mRNA	4840354	4845339	+	LOC_Os01g09490.1
chr01	4839488	4846251	BreakDancer:Pindel:DELLY:Lumpy	score=99;PE=14:SR=8;score=24:PE=13;SR=0:SU=4	exon	4840354	4842982	+	LOC_Os01g09490.1:exon_1
chr01	4839488	4846251	BreakDancer:Pindel:DELLY:Lumpy	score=99;PE=14:SR=8;score=24:PE=13;SR=0:SU=4	exon	4843366	4843429	+	LOC_Os01g09490.1:exon_2
chr01	4839488	4846251	BreakDancer:Pindel:DELLY:Lumpy	score=99;PE=14:SR=8;score=24:PE=13;SR=0:SU=4	exon	4843732	4843990	+	LOC_Os01g09490.1:exon_3
chr01	4839488	4846251	BreakDancer:Pindel:DELLY:Lumpy	score=99;PE=14:SR=8;score=24:PE=13;SR=0:SU=4	exon	4844083	4844332	+	LOC_Os01g09490.1:exon_4
chr01	4839488	4846251	BreakDancer:Pindel:DELLY:Lumpy	score=99;PE=14:SR=8;score=24:PE=13;SR=0:SU=4	exon	4844579	4844710	+	LOC_Os01g09490.1:exon_5
chr01	4839488	4846251	BreakDancer:Pindel:DELLY:Lumpy	score=99;PE=14:SR=8;score=24:PE=13;SR=0:SU=4	exon	4844771	4845043	+	LOC_Os01g09490.1:exon_6
chr01	4839488	4846251	BreakDancer:Pindel:DELLY:Lumpy	score=99;PE=14:SR=8;score=24:PE=13;SR=0:SU=4	exon	4845179	4845339	+	LOC_Os01g09490.1:exon_7
chr01	4839488	4846251	BreakDancer:Pindel:DELLY:Lumpy	score=99;PE=14:SR=8;score=24:PE=13;SR=0:SU=4	CDS	4840354	4842982	+	LOC_Os01g09490.1:cds_1
chr01	4839488	4846251	BreakDancer:Pindel:DELLY:Lumpy	score=99;PE=14:SR=8;score=24:PE=13;SR=0:SU=4	CDS	4843366	4843429	+	LOC_Os01g09490.1:cds_2
chr01	4839488	4846251	BreakDancer:Pindel:DELLY:Lumpy	score=99;PE=14:SR=8;score=24:PE=13;SR=0:SU=4	CDS	4843732	4843990	+	LOC_Os01g09490.1:cds_3
chr01	4839488	4846251	BreakDancer:Pindel:DELLY:Lumpy	score=99;PE=14:SR=8;score=24:PE=13;SR=0:SU=4	CDS	4844083	4844332	+	LOC_Os01g09490.1:cds_4
chr01	4839488	4846251	BreakDancer:Pindel:DELLY:Lumpy	score=99;PE=14:SR=8;score=24:PE=13;SR=0:SU=4	CDS	4844579	4844710	+	LOC_Os01g09490.1:cds_5
chr01	4839488	4846251	BreakDancer:Pindel:DELLY:Lumpy	score=99;PE=14:SR=8;score=24:PE=13;SR=0:SU=4	CDS	4844771	4845043	+	LOC_Os01g09490.1:cds_6
chr01	4839488	4846251	BreakDancer:Pindel:DELLY:Lumpy	score=99;PE=14:SR=8;score=24:PE=13;SR=0:SU=4	CDS	4845179	4845339	+	LOC_Os01g09490.1:cds_7
chr01	4855850	4868823	Pindel:DELLY:Lumpy	SR=3;score=6:PE=7;SR=0:SU=5	gene	4857087	4863438	+	LOC_Os01g09520
chr01	4855850	4868823	Pindel:DELLY:Lumpy	SR=3;score=6:PE=7;SR=0:SU=5	mRNA	4857087	4863438	+	LOC_Os01g09520.1
chr01	4855850	4868823	Pindel:DELLY:Lumpy	SR=3;score=6:PE=7;SR=0:SU=5	exon	4857087	4859441	+	LOC_Os01g09520.1:exon_1
chr01	4855850	4868823	Pindel:DELLY:Lumpy	SR=3;score=6:PE=7;SR=0:SU=5	exon	4859514	4859887	+	LOC_Os01g09520.1:exon_2
chr01	4855850	4868823	Pindel:DELLY:Lumpy	SR=3;score=6:PE=7;SR=0:SU=5	exon	4859934	4863165	+	LOC_Os01g09520.1:exon_3
chr01	4855850	4868823	Pindel:DELLY:Lumpy	SR=3;score=6:PE=7;SR=0:SU=5	exon	4863358	4863438	+	LOC_Os01g09520.1:exon_4
chr01	4855850	4868823	Pindel:DELLY:Lumpy	SR=3;score=6:PE=7;SR=0:SU=5	CDS	4857087	4859441	+	LOC_Os01g09520.1:cds_1
chr01	4855850	4868823	Pindel:DELLY:Lumpy	SR=3;score=6:PE=7;SR=0:SU=5	CDS	4859514	4859887	+	LOC_Os01g09520.1:cds_2
chr01	4855850	4868823	Pindel:DELLY:Lumpy	SR=3;score=6:PE=7;SR=0:SU=5	CDS	4859934	4863165	+	LOC_Os01g09520.1:cds_3
chr01	4855850	4868823	Pindel:DELLY:Lumpy	SR=3;score=6:PE=7;SR=0:SU=5	CDS	4863358	4863438	+	LOC_Os01g09520.1:cds_4
chr01	4855850	4868823	Pindel:DELLY:Lumpy	SR=3;score=6:PE=7;SR=0:SU=5	gene	4863878	4867115	-	LOC_Os01g09530
chr01	4855850	4868823	Pindel:DELLY:Lumpy	SR=3;score=6:PE=7;SR=0:SU=5	mRNA	4863878	4867115	-	LOC_Os01g09530.1
chr01	4855850	4868823	Pindel:DELLY:Lumpy	SR=3;score=6:PE=7;SR=0:SU=5	exon	4865854	4867115	-	LOC_Os01g09530.1:exon_1
chr01	4855850	4868823	Pindel:DELLY:Lumpy	SR=3;score=6:PE=7;SR=0:SU=5	exon	4863878	4865759	-	LOC_Os01g09530.1:exon_2
chr01	4855850	4868823	Pindel:DELLY:Lumpy	SR=3;score=6:PE=7;SR=0:SU=5	CDS	4865854	4867115	-	LOC_Os01g09530.1:cds_1
chr01	4855850	4868823	Pindel:DELLY:Lumpy	SR=3;score=6:PE=7;SR=0:SU=5	CDS	4863878	4865759	-	LOC_Os01g09530.1:cds_2
chr01	4886130	4886315	BreakDancer:Pindel	score=99;PE=14:SR=6;score=15	NA	NA	NA	NA	NA
chr01	4932001	4943322	BreakDancer:Pindel:DELLY:Lumpy	score=99;PE=19:SR=12;score=40:PE=17;SR=0:SU=8	gene	4932498	4938594	+	LOC_Os01g09600
chr01	4932001	4943322	BreakDancer:Pindel:DELLY:Lumpy	score=99;PE=19:SR=12;score=40:PE=17;SR=0:SU=8	mRNA	4932498	4938594	+	LOC_Os01g09600.1
chr01	4932001	4943322	BreakDancer:Pindel:DELLY:Lumpy	score=99;PE=19:SR=12;score=40:PE=17;SR=0:SU=8	exon	4932498	4935416	+	LOC_Os01g09600.1:exon_1
chr01	4932001	4943322	BreakDancer:Pindel:DELLY:Lumpy	score=99;PE=19:SR=12;score=40:PE=17;SR=0:SU=8	exon	4935474	4935800	+	LOC_Os01g09600.1:exon_2
chr01	4932001	4943322	BreakDancer:Pindel:DELLY:Lumpy	score=99;PE=19:SR=12;score=40:PE=17;SR=0:SU=8	exon	4935994	4936454	+	LOC_Os01g09600.1:exon_3
chr01	4932001	4943322	BreakDancer:Pindel:DELLY:Lumpy	score=99;PE=19:SR=12;score=40:PE=17;SR=0:SU=8	exon	4936632	4938594	+	LOC_Os01g09600.1:exon_4
chr01	4932001	4943322	BreakDancer:Pindel:DELLY:Lumpy	score=99;PE=19:SR=12;score=40:PE=17;SR=0:SU=8	CDS	4932498	4935416	+	LOC_Os01g09600.1:cds_1
chr01	4932001	4943322	BreakDancer:Pindel:DELLY:Lumpy	score=99;PE=19:SR=12;score=40:PE=17;SR=0:SU=8	CDS	4935474	4935800	+	LOC_Os01g09600.1:cds_2
chr01	4932001	4943322	BreakDancer:Pindel:DELLY:Lumpy	score=99;PE=19:SR=12;score=40:PE=17;SR=0:SU=8	CDS	4935994	4936454	+	LOC_Os01g09600.1:cds_3
chr01	4932001	4943322	BreakDancer:Pindel:DELLY:Lumpy	score=99;PE=19:SR=12;score=40:PE=17;SR=0:SU=8	CDS	4936632	4938594	+	LOC_Os01g09600.1:cds_4
chr01	4932001	4943322	BreakDancer:Pindel:DELLY:Lumpy	score=99;PE=19:SR=12;score=40:PE=17;SR=0:SU=8	gene	4938911	4941835	-	LOC_Os01g09610
chr01	4932001	4943322	BreakDancer:Pindel:DELLY:Lumpy	score=99;PE=19:SR=12;score=40:PE=17;SR=0:SU=8	mRNA	4938911	4941835	-	LOC_Os01g09610.1
chr01	4932001	4943322	BreakDancer:Pindel:DELLY:Lumpy	score=99;PE=19:SR=12;score=40:PE=17;SR=0:SU=8	exon	4940951	4941835	-	LOC_Os01g09610.1:exon_1
chr01	4932001	4943322	BreakDancer:Pindel:DELLY:Lumpy	score=99;PE=19:SR=12;score=40:PE=17;SR=0:SU=8	exon	4940135	4940864	-	LOC_Os01g09610.1:exon_2
chr01	4932001	4943322	BreakDancer:Pindel:DELLY:Lumpy	score=99;PE=19:SR=12;score=40:PE=17;SR=0:SU=8	exon	4939873	4940060	-	LOC_Os01g09610.1:exon_3
chr01	4932001	4943322	BreakDancer:Pindel:DELLY:Lumpy	score=99;PE=19:SR=12;score=40:PE=17;SR=0:SU=8	exon	4939608	4939797	-	LOC_Os01g09610.1:exon_4
chr01	4932001	4943322	BreakDancer:Pindel:DELLY:Lumpy	score=99;PE=19:SR=12;score=40:PE=17;SR=0:SU=8	exon	4939432	4939536	-	LOC_Os01g09610.1:exon_5
chr01	4932001	4943322	BreakDancer:Pindel:DELLY:Lumpy	score=99;PE=19:SR=12;score=40:PE=17;SR=0:SU=8	exon	4938911	4939359	-	LOC_Os01g09610.1:exon_6
chr01	4932001	4943322	BreakDancer:Pindel:DELLY:Lumpy	score=99;PE=19:SR=12;score=40:PE=17;SR=0:SU=8	CDS	4940951	4941835	-	LOC_Os01g09610.1:cds_1
chr01	4932001	4943322	BreakDancer:Pindel:DELLY:Lumpy	score=99;PE=19:SR=12;score=40:PE=17;SR=0:SU=8	CDS	4940135	4940864	-	LOC_Os01g09610.1:cds_2
chr01	4932001	4943322	BreakDancer:Pindel:DELLY:Lumpy	score=99;PE=19:SR=12;score=40:PE=17;SR=0:SU=8	CDS	4939873	4940060	-	LOC_Os01g09610.1:cds_3
chr01	4932001	4943322	BreakDancer:Pindel:DELLY:Lumpy	score=99;PE=19:SR=12;score=40:PE=17;SR=0:SU=8	CDS	4939608	4939797	-	LOC_Os01g09610.1:cds_4
chr01	4932001	4943322	BreakDancer:Pindel:DELLY:Lumpy	score=99;PE=19:SR=12;score=40:PE=17;SR=0:SU=8	CDS	4939432	4939536	-	LOC_Os01g09610.1:cds_5
chr01	4932001	4943322	BreakDancer:Pindel:DELLY:Lumpy	score=99;PE=19:SR=12;score=40:PE=17;SR=0:SU=8	CDS	4938911	4939359	-	LOC_Os01g09610.1:cds_6
chr01	4987573	4988570	BreakDancer:Pindel:DELLY:SVseq2	score=99;PE=10:SR=8;score=16:PE=11;SR=7:SR=4	gene	4987704	4988201	-	LOC_Os01g09680
chr01	4987573	4988570	BreakDancer:Pindel:DELLY:SVseq2	score=99;PE=10:SR=8;score=16:PE=11;SR=7:SR=4	mRNA	4987704	4988201	-	LOC_Os01g09680.1
chr01	4987573	4988570	BreakDancer:Pindel:DELLY:SVseq2	score=99;PE=10:SR=8;score=16:PE=11;SR=7:SR=4	exon	4987704	4988201	-	LOC_Os01g09680.1:exon_1
chr01	4987573	4988570	BreakDancer:Pindel:DELLY:SVseq2	score=99;PE=10:SR=8;score=16:PE=11;SR=7:SR=4	CDS	4987704	4988201	-	LOC_Os01g09680.1:cds_1
chr01	5051243	5051592	BreakDancer:Pindel:DELLY	score=99;PE=12:SR=4;score=5:PE=14;SR=0	NA	NA	NA	NA	NA
chr01	5086656	5087010	BreakDancer:DELLY	score=99;PE=17:PE=16;SR=0	NA	NA	NA	NA	NA
chr01	5142108	5142638	BreakDancer:DELLY	score=84;PE=4:PE=8;SR=0	NA	NA	NA	NA	NA
chr01	5272510	5272763	BreakDancer:Pindel	score=99;PE=10:SR=7;score=14	gene	5270103	5275678	-	LOC_Os01g10110
chr01	5272510	5272763	BreakDancer:Pindel	score=99;PE=10:SR=7;score=14	mRNA	5270103	5275678	-	LOC_Os01g10110.1
chr01	5280813	5281903	BreakDancer:DELLY:SVseq2	score=99;PE=9:PE=9;SR=4:SR=5	gene	5281182	5281505	+	LOC_Os01g10120
chr01	5280813	5281903	BreakDancer:DELLY:SVseq2	score=99;PE=9:PE=9;SR=4:SR=5	mRNA	5281182	5281505	+	LOC_Os01g10120.1
chr01	5280813	5281903	BreakDancer:DELLY:SVseq2	score=99;PE=9:PE=9;SR=4:SR=5	exon	5281182	5281505	+	LOC_Os01g10120.1:exon_1
chr01	5280813	5281903	BreakDancer:DELLY:SVseq2	score=99;PE=9:PE=9;SR=4:SR=5	CDS	5281182	5281505	+	LOC_Os01g10120.1:cds_1
chr01	5282117	5285660	BreakDancer:Pindel:DELLY:Lumpy	score=99;PE=15:SR=5;score=12:PE=17;SR=0:SU=5	NA	NA	NA	NA	NA
chr01	5289860	5290004	BreakDancer:Pindel:SVseq2	score=99;PE=24:SR=8;score=21:SR=3	gene	5288135	5293325	-	LOC_Os01g10130
chr01	5289860	5290004	BreakDancer:Pindel:SVseq2	score=99;PE=24:SR=8;score=21:SR=3	mRNA	5288135	5293325	-	LOC_Os01g10130.1
chr01	5289860	5290004	BreakDancer:Pindel:SVseq2	score=99;PE=24:SR=8;score=21:SR=3	exon	5289913	5290060	-	LOC_Os01g10130.1:exon_6
chr01	5289860	5290004	BreakDancer:Pindel:SVseq2	score=99;PE=24:SR=8;score=21:SR=3	CDS	5289913	5290060	-	LOC_Os01g10130.1:cds_5
chr01	5336479	5339887	BreakDancer:Pindel:DELLY:Lumpy	score=99;PE=17:SR=8;score=24:PE=17;SR=0:SU=4	gene	5336704	5337330	-	LOC_Os01g10160
chr01	5336479	5339887	BreakDancer:Pindel:DELLY:Lumpy	score=99;PE=17:SR=8;score=24:PE=17;SR=0:SU=4	mRNA	5336704	5337330	-	LOC_Os01g10160.1
chr01	5336479	5339887	BreakDancer:Pindel:DELLY:Lumpy	score=99;PE=17:SR=8;score=24:PE=17;SR=0:SU=4	exon	5336704	5337330	-	LOC_Os01g10160.1:exon_1
chr01	5336479	5339887	BreakDancer:Pindel:DELLY:Lumpy	score=99;PE=17:SR=8;score=24:PE=17;SR=0:SU=4	CDS	5336704	5337330	-	LOC_Os01g10160.1:cds_1
chr01	5336479	5339887	BreakDancer:Pindel:DELLY:Lumpy	score=99;PE=17:SR=8;score=24:PE=17;SR=0:SU=4	gene	5339444	5339729	+	LOC_Os01g10170
chr01	5336479	5339887	BreakDancer:Pindel:DELLY:Lumpy	score=99;PE=17:SR=8;score=24:PE=17;SR=0:SU=4	mRNA	5339444	5339729	+	LOC_Os01g10170.1
chr01	5336479	5339887	BreakDancer:Pindel:DELLY:Lumpy	score=99;PE=17:SR=8;score=24:PE=17;SR=0:SU=4	exon	5339444	5339507	+	LOC_Os01g10170.1:exon_1
chr01	5336479	5339887	BreakDancer:Pindel:DELLY:Lumpy	score=99;PE=17:SR=8;score=24:PE=17;SR=0:SU=4	exon	5339566	5339729	+	LOC_Os01g10170.1:exon_2
chr01	5336479	5339887	BreakDancer:Pindel:DELLY:Lumpy	score=99;PE=17:SR=8;score=24:PE=17;SR=0:SU=4	CDS	5339444	5339507	+	LOC_Os01g10170.1:cds_1
chr01	5336479	5339887	BreakDancer:Pindel:DELLY:Lumpy	score=99;PE=17:SR=8;score=24:PE=17;SR=0:SU=4	CDS	5339566	5339729	+	LOC_Os01g10170.1:cds_2
chr01	5347010	5351102	Pindel:CNVnator	SR=5;score=10:eval1=0.0465846;eval2=0.395986;eval3=45.1247;eval4=6661.09	NA	NA	NA	NA	NA
chr01	5358128	5358489	BreakDancer:DELLY	score=99;PE=15:PE=16;SR=0	NA	NA	NA	NA	NA
chr01	5366011	5366345	BreakDancer:Pindel:DELLY:SVseq2:softSearch	score=99;PE=11:SR=10;score=20:PE=12;SR=0:SR=4:nr=14;sc=7	NA	NA	NA	NA	NA
chr01	5370524	5371185	BreakDancer:DELLY	score=70;PE=3:PE=4;SR=0	NA	NA	NA	NA	NA
chr01	5386512	5388402	BreakDancer:Pindel:DELLY	score=99;PE=10:SR=5;score=10:PE=10;SR=0	gene	5386995	5388128	+	LOC_Os01g10240
chr01	5386512	5388402	BreakDancer:Pindel:DELLY	score=99;PE=10:SR=5;score=10:PE=10;SR=0	mRNA	5386995	5388128	+	LOC_Os01g10240.1
chr01	5386512	5388402	BreakDancer:Pindel:DELLY	score=99;PE=10:SR=5;score=10:PE=10;SR=0	exon	5386995	5387209	+	LOC_Os01g10240.1:exon_1
chr01	5386512	5388402	BreakDancer:Pindel:DELLY	score=99;PE=10:SR=5;score=10:PE=10;SR=0	exon	5387243	5387318	+	LOC_Os01g10240.1:exon_2
chr01	5386512	5388402	BreakDancer:Pindel:DELLY	score=99;PE=10:SR=5;score=10:PE=10;SR=0	exon	5387472	5388128	+	LOC_Os01g10240.1:exon_3
chr01	5386512	5388402	BreakDancer:Pindel:DELLY	score=99;PE=10:SR=5;score=10:PE=10;SR=0	CDS	5386995	5387209	+	LOC_Os01g10240.1:cds_1
chr01	5386512	5388402	BreakDancer:Pindel:DELLY	score=99;PE=10:SR=5;score=10:PE=10;SR=0	CDS	5387243	5387318	+	LOC_Os01g10240.1:cds_2
chr01	5386512	5388402	BreakDancer:Pindel:DELLY	score=99;PE=10:SR=5;score=10:PE=10;SR=0	CDS	5387472	5388128	+	LOC_Os01g10240.1:cds_3
chr01	5528625	5528865	BreakDancer:Pindel:SVseq2	score=99;PE=10:SR=10;score=36:SR=7	NA	NA	NA	NA	NA
chr01	5667283	5668274	BreakDancer:Pindel:DELLY:SVseq2:Lumpy	score=99;PE=11:SR=7;score=20:PE=18;SR=0:SR=5:SU=5	gene	5663323	5668903	-	LOC_Os01g10600
chr01	5667283	5668274	BreakDancer:Pindel:DELLY:SVseq2:Lumpy	score=99;PE=11:SR=7;score=20:PE=18;SR=0:SR=5:SU=5	mRNA	5663323	5668903	-	LOC_Os01g10600.1
chr01	5710803	5710926	BreakDancer:Pindel	score=99;PE=17:SR=5;score=6	NA	NA	NA	NA	NA
chr01	5736048	5741160	BreakDancer:Pindel:DELLY:Lumpy	score=99;PE=11:SR=12;score=13:PE=17;SR=5:SU=6	gene	5736299	5740751	-	LOC_Os01g10720
chr01	5736048	5741160	BreakDancer:Pindel:DELLY:Lumpy	score=99;PE=11:SR=12;score=13:PE=17;SR=5:SU=6	mRNA	5736299	5740751	-	LOC_Os01g10720.1
chr01	5736048	5741160	BreakDancer:Pindel:DELLY:Lumpy	score=99;PE=11:SR=12;score=13:PE=17;SR=5:SU=6	exon	5740614	5740751	-	LOC_Os01g10720.1:exon_1
chr01	5736048	5741160	BreakDancer:Pindel:DELLY:Lumpy	score=99;PE=11:SR=12;score=13:PE=17;SR=5:SU=6	exon	5740152	5740308	-	LOC_Os01g10720.1:exon_2
chr01	5736048	5741160	BreakDancer:Pindel:DELLY:Lumpy	score=99;PE=11:SR=12;score=13:PE=17;SR=5:SU=6	exon	5738708	5740104	-	LOC_Os01g10720.1:exon_3
chr01	5736048	5741160	BreakDancer:Pindel:DELLY:Lumpy	score=99;PE=11:SR=12;score=13:PE=17;SR=5:SU=6	exon	5737493	5738530	-	LOC_Os01g10720.1:exon_4
chr01	5736048	5741160	BreakDancer:Pindel:DELLY:Lumpy	score=99;PE=11:SR=12;score=13:PE=17;SR=5:SU=6	exon	5736299	5736970	-	LOC_Os01g10720.1:exon_5
chr01	5736048	5741160	BreakDancer:Pindel:DELLY:Lumpy	score=99;PE=11:SR=12;score=13:PE=17;SR=5:SU=6	CDS	5740614	5740751	-	LOC_Os01g10720.1:cds_1
chr01	5736048	5741160	BreakDancer:Pindel:DELLY:Lumpy	score=99;PE=11:SR=12;score=13:PE=17;SR=5:SU=6	CDS	5740152	5740308	-	LOC_Os01g10720.1:cds_2
chr01	5736048	5741160	BreakDancer:Pindel:DELLY:Lumpy	score=99;PE=11:SR=12;score=13:PE=17;SR=5:SU=6	CDS	5738708	5740104	-	LOC_Os01g10720.1:cds_3
chr01	5736048	5741160	BreakDancer:Pindel:DELLY:Lumpy	score=99;PE=11:SR=12;score=13:PE=17;SR=5:SU=6	CDS	5737493	5738530	-	LOC_Os01g10720.1:cds_4
chr01	5736048	5741160	BreakDancer:Pindel:DELLY:Lumpy	score=99;PE=11:SR=12;score=13:PE=17;SR=5:SU=6	CDS	5736299	5736970	-	LOC_Os01g10720.1:cds_5
chr01	5772749	5773216	BreakDancer:Pindel:DELLY	score=99;PE=11:SR=5;score=6:PE=13;SR=0	NA	NA	NA	NA	NA
chr01	5779226	5780352	BreakDancer:DELLY:Lumpy	score=99;PE=8:PE=7;SR=0:SU=6	NA	NA	NA	NA	NA
chr01	5786379	5786720	BreakDancer:Pindel:DELLY	score=99;PE=12:SR=8;score=25:PE=10;SR=0	NA	NA	NA	NA	NA
chr01	5825724	5826595	BreakDancer:Pindel:DELLY	score=99;PE=9:SR=8;score=24:PE=12;SR=0	gene	5823869	5828251	-	LOC_Os01g10920
chr01	5825724	5826595	BreakDancer:Pindel:DELLY	score=99;PE=9:SR=8;score=24:PE=12;SR=0	mRNA	5823869	5828251	-	LOC_Os01g10920.1
chr01	6014294	6014564	BreakDancer:Pindel:SVseq2	score=99;PE=22:SR=8;score=24:SR=3	NA	NA	NA	NA	NA
chr01	6066365	6071014	BreakDancer:Pindel:DELLY	score=99;PE=7:SR=7;score=14:PE=12;SR=0	gene	6065683	6066478	-	LOC_Os01g11320
chr01	6066365	6071014	BreakDancer:Pindel:DELLY	score=99;PE=7:SR=7;score=14:PE=12;SR=0	mRNA	6065683	6066478	-	LOC_Os01g11320.1
chr01	6066365	6071014	BreakDancer:Pindel:DELLY	score=99;PE=7:SR=7;score=14:PE=12;SR=0	exon	6066384	6066478	-	LOC_Os01g11320.1:exon_1
chr01	6066365	6071014	BreakDancer:Pindel:DELLY	score=99;PE=7:SR=7;score=14:PE=12;SR=0	CDS	6066384	6066478	-	LOC_Os01g11320.1:cds_1
chr01	6066365	6071014	BreakDancer:Pindel:DELLY	score=99;PE=7:SR=7;score=14:PE=12;SR=0	gene	6068798	6071736	+	LOC_Os01g11330
chr01	6066365	6071014	BreakDancer:Pindel:DELLY	score=99;PE=7:SR=7;score=14:PE=12;SR=0	mRNA	6068798	6071736	+	LOC_Os01g11330.1
chr01	6066365	6071014	BreakDancer:Pindel:DELLY	score=99;PE=7:SR=7;score=14:PE=12;SR=0	exon	6068798	6069580	+	LOC_Os01g11330.1:exon_1
chr01	6066365	6071014	BreakDancer:Pindel:DELLY	score=99;PE=7:SR=7;score=14:PE=12;SR=0	exon	6069676	6070127	+	LOC_Os01g11330.1:exon_2
chr01	6066365	6071014	BreakDancer:Pindel:DELLY	score=99;PE=7:SR=7;score=14:PE=12;SR=0	CDS	6068798	6069580	+	LOC_Os01g11330.1:cds_1
chr01	6066365	6071014	BreakDancer:Pindel:DELLY	score=99;PE=7:SR=7;score=14:PE=12;SR=0	CDS	6069676	6070127	+	LOC_Os01g11330.1:cds_2
chr01	6161928	6167721	BreakDancer:DELLY	score=99;PE=11:PE=12;SR=0	gene	6163187	6166385	-	LOC_Os01g11450
chr01	6161928	6167721	BreakDancer:DELLY	score=99;PE=11:PE=12;SR=0	mRNA	6163187	6166385	-	LOC_Os01g11450.1
chr01	6161928	6167721	BreakDancer:DELLY	score=99;PE=11:PE=12;SR=0	exon	6165869	6166385	-	LOC_Os01g11450.1:exon_1
chr01	6161928	6167721	BreakDancer:DELLY	score=99;PE=11:PE=12;SR=0	exon	6165696	6165761	-	LOC_Os01g11450.1:exon_2
chr01	6161928	6167721	BreakDancer:DELLY	score=99;PE=11:PE=12;SR=0	exon	6164868	6165523	-	LOC_Os01g11450.1:exon_3
chr01	6161928	6167721	BreakDancer:DELLY	score=99;PE=11:PE=12;SR=0	exon	6163455	6164833	-	LOC_Os01g11450.1:exon_4
chr01	6161928	6167721	BreakDancer:DELLY	score=99;PE=11:PE=12;SR=0	exon	6163187	6163241	-	LOC_Os01g11450.1:exon_5
chr01	6161928	6167721	BreakDancer:DELLY	score=99;PE=11:PE=12;SR=0	CDS	6165869	6166385	-	LOC_Os01g11450.1:cds_1
chr01	6161928	6167721	BreakDancer:DELLY	score=99;PE=11:PE=12;SR=0	CDS	6165696	6165761	-	LOC_Os01g11450.1:cds_2
chr01	6161928	6167721	BreakDancer:DELLY	score=99;PE=11:PE=12;SR=0	CDS	6164868	6165523	-	LOC_Os01g11450.1:cds_3
chr01	6161928	6167721	BreakDancer:DELLY	score=99;PE=11:PE=12;SR=0	CDS	6163455	6164833	-	LOC_Os01g11450.1:cds_4
chr01	6161928	6167721	BreakDancer:DELLY	score=99;PE=11:PE=12;SR=0	CDS	6163187	6163241	-	LOC_Os01g11450.1:cds_5
chr01	6174284	6178153	BreakDancer:Pindel:DELLY:Lumpy	score=99;PE=10:SR=4;score=8:PE=13;SR=0:SU=5	NA	NA	NA	NA	NA
chr01	6193914	6194525	BreakDancer:DELLY	score=99;PE=7:PE=6;SR=0	NA	NA	NA	NA	NA
chr01	6206750	6212352	BreakDancer:DELLY:CNVnator:Lumpy	score=99;PE=15:PE=16;SR=0:eval1=4.10716e-08;eval2=5.04342e-18;eval3=0.00357199;eval4=2.18236e-09:SU=6	NA	NA	NA	NA	NA
chr01	6220218	6220553	BreakDancer:Pindel:DELLY	score=99;PE=20:SR=7;score=20:PE=17;SR=0	NA	NA	NA	NA	NA
chr01	6262586	6263874	BreakDancer:DELLY:SVseq2:Lumpy	score=99;PE=8:PE=10;SR=0:SR=3:SU=5	NA	NA	NA	NA	NA
chr01	6386290	6386404	Pindel:SVseq2	SR=16;score=77:SR=4	NA	NA	NA	NA	NA
chr01	6545894	6555120	SVseq2:Lumpy	SR=3:SU=9	gene	6546714	6554267	+	LOC_Os01g12040
chr01	6545894	6555120	SVseq2:Lumpy	SR=3:SU=9	mRNA	6546714	6554267	+	LOC_Os01g12040.1
chr01	6545894	6555120	SVseq2:Lumpy	SR=3:SU=9	exon	6546714	6548635	+	LOC_Os01g12040.1:exon_1
chr01	6545894	6555120	SVseq2:Lumpy	SR=3:SU=9	exon	6549047	6549342	+	LOC_Os01g12040.1:exon_2
chr01	6545894	6555120	SVseq2:Lumpy	SR=3:SU=9	exon	6549782	6549932	+	LOC_Os01g12040.1:exon_3
chr01	6545894	6555120	SVseq2:Lumpy	SR=3:SU=9	exon	6550005	6550374	+	LOC_Os01g12040.1:exon_4
chr01	6545894	6555120	SVseq2:Lumpy	SR=3:SU=9	exon	6550459	6550869	+	LOC_Os01g12040.1:exon_5
chr01	6545894	6555120	SVseq2:Lumpy	SR=3:SU=9	exon	6550961	6551259	+	LOC_Os01g12040.1:exon_6
chr01	6545894	6555120	SVseq2:Lumpy	SR=3:SU=9	exon	6551336	6551594	+	LOC_Os01g12040.1:exon_7
chr01	6545894	6555120	SVseq2:Lumpy	SR=3:SU=9	exon	6551687	6551936	+	LOC_Os01g12040.1:exon_8
chr01	6545894	6555120	SVseq2:Lumpy	SR=3:SU=9	exon	6552183	6552314	+	LOC_Os01g12040.1:exon_9
chr01	6545894	6555120	SVseq2:Lumpy	SR=3:SU=9	exon	6552375	6552647	+	LOC_Os01g12040.1:exon_10
chr01	6545894	6555120	SVseq2:Lumpy	SR=3:SU=9	exon	6552783	6552847	+	LOC_Os01g12040.1:exon_11
chr01	6545894	6555120	SVseq2:Lumpy	SR=3:SU=9	exon	6553355	6553513	+	LOC_Os01g12040.1:exon_12
chr01	6545894	6555120	SVseq2:Lumpy	SR=3:SU=9	exon	6554109	6554267	+	LOC_Os01g12040.1:exon_13
chr01	6545894	6555120	SVseq2:Lumpy	SR=3:SU=9	CDS	6546714	6548635	+	LOC_Os01g12040.1:cds_1
chr01	6545894	6555120	SVseq2:Lumpy	SR=3:SU=9	CDS	6549047	6549342	+	LOC_Os01g12040.1:cds_2
chr01	6545894	6555120	SVseq2:Lumpy	SR=3:SU=9	CDS	6549782	6549932	+	LOC_Os01g12040.1:cds_3
chr01	6545894	6555120	SVseq2:Lumpy	SR=3:SU=9	CDS	6550005	6550374	+	LOC_Os01g12040.1:cds_4
chr01	6545894	6555120	SVseq2:Lumpy	SR=3:SU=9	CDS	6550459	6550869	+	LOC_Os01g12040.1:cds_5
chr01	6545894	6555120	SVseq2:Lumpy	SR=3:SU=9	CDS	6550961	6551259	+	LOC_Os01g12040.1:cds_6
chr01	6545894	6555120	SVseq2:Lumpy	SR=3:SU=9	CDS	6551336	6551594	+	LOC_Os01g12040.1:cds_7
chr01	6545894	6555120	SVseq2:Lumpy	SR=3:SU=9	CDS	6551687	6551936	+	LOC_Os01g12040.1:cds_8
chr01	6545894	6555120	SVseq2:Lumpy	SR=3:SU=9	CDS	6552183	6552314	+	LOC_Os01g12040.1:cds_9
chr01	6545894	6555120	SVseq2:Lumpy	SR=3:SU=9	CDS	6552375	6552647	+	LOC_Os01g12040.1:cds_10
chr01	6545894	6555120	SVseq2:Lumpy	SR=3:SU=9	CDS	6552783	6552847	+	LOC_Os01g12040.1:cds_11
chr01	6545894	6555120	SVseq2:Lumpy	SR=3:SU=9	CDS	6553355	6553513	+	LOC_Os01g12040.1:cds_12
chr01	6545894	6555120	SVseq2:Lumpy	SR=3:SU=9	CDS	6554109	6554267	+	LOC_Os01g12040.1:cds_13
chr01	6734109	6735336	CNVnator:SVseq2	eval1=6.48186;eval2=2.72798e-08;eval3=1;eval4=1:SR=3	gene	6732152	6735486	+	LOC_Os01g12330
chr01	6734109	6735336	CNVnator:SVseq2	eval1=6.48186;eval2=2.72798e-08;eval3=1;eval4=1:SR=3	mRNA	6732152	6735486	+	LOC_Os01g12330.1
chr01	6734109	6735336	CNVnator:SVseq2	eval1=6.48186;eval2=2.72798e-08;eval3=1;eval4=1:SR=3	exon	6733535	6735486	+	LOC_Os01g12330.1:exon_2
chr01	6734109	6735336	CNVnator:SVseq2	eval1=6.48186;eval2=2.72798e-08;eval3=1;eval4=1:SR=3	CDS	6733553	6734602	+	LOC_Os01g12330.1:cds_1
chr01	6734109	6735336	CNVnator:SVseq2	eval1=6.48186;eval2=2.72798e-08;eval3=1;eval4=1:SR=3	three_prime_UTR	6734603	6735486	+	LOC_Os01g12330.1:utr_3
chr01	7079480	7079750	BreakDancer:Pindel:SVseq2	score=99;PE=15:SR=3;score=6:SR=4	NA	NA	NA	NA	NA
chr01	7119584	7119728	Pindel:SVseq2	SR=7;score=18:SR=3	gene	7115771	7124102	+	LOC_Os01g12860
chr01	7119584	7119728	Pindel:SVseq2	SR=7;score=18:SR=3	mRNA	7115771	7124102	+	LOC_Os01g12860.1
chr01	7122248	7122426	BreakDancer:Pindel:SVseq2	score=63;PE=4:SR=5;score=10:SR=3	gene	7115771	7124102	+	LOC_Os01g12860
chr01	7122248	7122426	BreakDancer:Pindel:SVseq2	score=63;PE=4:SR=5;score=10:SR=3	mRNA	7115771	7124102	+	LOC_Os01g12860.1
chr01	7143147	7143304	BreakDancer:Pindel	score=99;PE=25:SR=3;score=4	NA	NA	NA	NA	NA
chr01	7257575	7257850	BreakDancer:DELLY:SVseq2	score=99;PE=22:PE=0;SR=4:SR=4	NA	NA	NA	NA	NA
chr01	7393899	7394256	BreakDancer:DELLY	score=99;PE=11:PE=10;SR=0	NA	NA	NA	NA	NA
chr01	7396509	7396861	DELLY:Lumpy	PE=5;SR=0:SU=4	NA	NA	NA	NA	NA
chr01	7458230	7458608	BreakDancer:Pindel:DELLY:SVseq2	score=99;PE=10:SR=7;score=20:PE=9;SR=0:SR=3	gene	7457835	7459959	+	LOC_Os01g13390
chr01	7458230	7458608	BreakDancer:Pindel:DELLY:SVseq2	score=99;PE=10:SR=7;score=20:PE=9;SR=0:SR=3	mRNA	7457835	7459959	+	LOC_Os01g13390.1
chr01	7538635	7539617	BreakDancer:Pindel:DELLY:CNVnator	score=99;PE=24:SR=3;score=6:PE=26;SR=0:eval1=76.2508;eval2=2.00657e-05;eval3=1;eval4=1	NA	NA	NA	NA	NA
chr01	7612848	7613196	BreakDancer:Pindel:DELLY	score=99;PE=19:SR=7;score=18:PE=20;SR=0	NA	NA	NA	NA	NA
chr01	7614685	7614934	BreakDancer:Pindel	score=99;PE=23:SR=5;score=12	NA	NA	NA	NA	NA
chr01	7671586	7672075	BreakDancer:Pindel:DELLY	score=99;PE=20:SR=11;score=42:PE=20;SR=0	gene	7670066	7672762	+	LOC_Os01g13700
chr01	7671586	7672075	BreakDancer:Pindel:DELLY	score=99;PE=20:SR=11;score=42:PE=20;SR=0	mRNA	7670066	7672762	+	LOC_Os01g13700.1
chr01	7703043	7703951	BreakDancer:DELLY:Lumpy	score=99;PE=14:PE=15;SR=0:SU=6	NA	NA	NA	NA	NA
chr01	7761716	7764464	BreakDancer:DELLY:SVseq2:Lumpy	score=99;PE=20:PE=23;SR=0:SR=3:SU=9	gene	7764433	7766034	-	LOC_Os01g13840
chr01	7761716	7764464	BreakDancer:DELLY:SVseq2:Lumpy	score=99;PE=20:PE=23;SR=0:SR=3:SU=9	mRNA	7764433	7766034	-	LOC_Os01g13840.1
chr01	7761716	7764464	BreakDancer:DELLY:SVseq2:Lumpy	score=99;PE=20:PE=23;SR=0:SR=3:SU=9	exon	7764433	7764477	-	LOC_Os01g13840.1:exon_4
chr01	7761716	7764464	BreakDancer:DELLY:SVseq2:Lumpy	score=99;PE=20:PE=23;SR=0:SR=3:SU=9	CDS	7764433	7764477	-	LOC_Os01g13840.1:cds_4
chr01	7781208	7792412	BreakDancer:Pindel:DELLY:CNVnator:Lumpy	score=99;PE=15:SR=5;score=12:PE=16;SR=0:eval1=1.34964e-08;eval2=26025.7;eval3=4.98517e-06;eval4=171051:SU=5	gene	7782803	7788695	+	LOC_Os01g13890
chr01	7781208	7792412	BreakDancer:Pindel:DELLY:CNVnator:Lumpy	score=99;PE=15:SR=5;score=12:PE=16;SR=0:eval1=1.34964e-08;eval2=26025.7;eval3=4.98517e-06;eval4=171051:SU=5	mRNA	7782803	7788695	+	LOC_Os01g13890.1
chr01	7781208	7792412	BreakDancer:Pindel:DELLY:CNVnator:Lumpy	score=99;PE=15:SR=5;score=12:PE=16;SR=0:eval1=1.34964e-08;eval2=26025.7;eval3=4.98517e-06;eval4=171051:SU=5	exon	7782803	7784818	+	LOC_Os01g13890.1:exon_1
chr01	7781208	7792412	BreakDancer:Pindel:DELLY:CNVnator:Lumpy	score=99;PE=15:SR=5;score=12:PE=16;SR=0:eval1=1.34964e-08;eval2=26025.7;eval3=4.98517e-06;eval4=171051:SU=5	exon	7784891	7786183	+	LOC_Os01g13890.1:exon_2
chr01	7781208	7792412	BreakDancer:Pindel:DELLY:CNVnator:Lumpy	score=99;PE=15:SR=5;score=12:PE=16;SR=0:eval1=1.34964e-08;eval2=26025.7;eval3=4.98517e-06;eval4=171051:SU=5	exon	7786397	7787047	+	LOC_Os01g13890.1:exon_3
chr01	7781208	7792412	BreakDancer:Pindel:DELLY:CNVnator:Lumpy	score=99;PE=15:SR=5;score=12:PE=16;SR=0:eval1=1.34964e-08;eval2=26025.7;eval3=4.98517e-06;eval4=171051:SU=5	exon	7787478	7788695	+	LOC_Os01g13890.1:exon_4
chr01	7781208	7792412	BreakDancer:Pindel:DELLY:CNVnator:Lumpy	score=99;PE=15:SR=5;score=12:PE=16;SR=0:eval1=1.34964e-08;eval2=26025.7;eval3=4.98517e-06;eval4=171051:SU=5	CDS	7782803	7784818	+	LOC_Os01g13890.1:cds_1
chr01	7781208	7792412	BreakDancer:Pindel:DELLY:CNVnator:Lumpy	score=99;PE=15:SR=5;score=12:PE=16;SR=0:eval1=1.34964e-08;eval2=26025.7;eval3=4.98517e-06;eval4=171051:SU=5	CDS	7784891	7786183	+	LOC_Os01g13890.1:cds_2
chr01	7781208	7792412	BreakDancer:Pindel:DELLY:CNVnator:Lumpy	score=99;PE=15:SR=5;score=12:PE=16;SR=0:eval1=1.34964e-08;eval2=26025.7;eval3=4.98517e-06;eval4=171051:SU=5	CDS	7786397	7787047	+	LOC_Os01g13890.1:cds_3
chr01	7781208	7792412	BreakDancer:Pindel:DELLY:CNVnator:Lumpy	score=99;PE=15:SR=5;score=12:PE=16;SR=0:eval1=1.34964e-08;eval2=26025.7;eval3=4.98517e-06;eval4=171051:SU=5	CDS	7787478	7788695	+	LOC_Os01g13890.1:cds_4
chr01	7781208	7792412	BreakDancer:Pindel:DELLY:CNVnator:Lumpy	score=99;PE=15:SR=5;score=12:PE=16;SR=0:eval1=1.34964e-08;eval2=26025.7;eval3=4.98517e-06;eval4=171051:SU=5	gene	7789318	7790571	-	LOC_Os01g13900
chr01	7781208	7792412	BreakDancer:Pindel:DELLY:CNVnator:Lumpy	score=99;PE=15:SR=5;score=12:PE=16;SR=0:eval1=1.34964e-08;eval2=26025.7;eval3=4.98517e-06;eval4=171051:SU=5	mRNA	7789318	7790571	-	LOC_Os01g13900.1
chr01	7781208	7792412	BreakDancer:Pindel:DELLY:CNVnator:Lumpy	score=99;PE=15:SR=5;score=12:PE=16;SR=0:eval1=1.34964e-08;eval2=26025.7;eval3=4.98517e-06;eval4=171051:SU=5	exon	7789318	7790571	-	LOC_Os01g13900.1:exon_1
chr01	7781208	7792412	BreakDancer:Pindel:DELLY:CNVnator:Lumpy	score=99;PE=15:SR=5;score=12:PE=16;SR=0:eval1=1.34964e-08;eval2=26025.7;eval3=4.98517e-06;eval4=171051:SU=5	CDS	7789318	7790571	-	LOC_Os01g13900.1:cds_1
chr01	7781208	7792412	BreakDancer:Pindel:DELLY:CNVnator:Lumpy	score=99;PE=15:SR=5;score=12:PE=16;SR=0:eval1=1.34964e-08;eval2=26025.7;eval3=4.98517e-06;eval4=171051:SU=5	gene	7792032	7794446	+	LOC_Os01g13910
chr01	7781208	7792412	BreakDancer:Pindel:DELLY:CNVnator:Lumpy	score=99;PE=15:SR=5;score=12:PE=16;SR=0:eval1=1.34964e-08;eval2=26025.7;eval3=4.98517e-06;eval4=171051:SU=5	mRNA	7792032	7794446	+	LOC_Os01g13910.1
chr01	7781208	7792412	BreakDancer:Pindel:DELLY:CNVnator:Lumpy	score=99;PE=15:SR=5;score=12:PE=16;SR=0:eval1=1.34964e-08;eval2=26025.7;eval3=4.98517e-06;eval4=171051:SU=5	exon	7792032	7792124	+	LOC_Os01g13910.1:exon_1
chr01	7781208	7792412	BreakDancer:Pindel:DELLY:CNVnator:Lumpy	score=99;PE=15:SR=5;score=12:PE=16;SR=0:eval1=1.34964e-08;eval2=26025.7;eval3=4.98517e-06;eval4=171051:SU=5	CDS	7792032	7792124	+	LOC_Os01g13910.1:cds_1
chr01	7867966	7868241	BreakDancer:Pindel:SVseq2	score=99;PE=13:SR=6;score=15:SR=3	NA	NA	NA	NA	NA
chr01	7896586	7896853	BreakDancer:Pindel	score=99;PE=22:SR=10;score=27	gene	7894959	7900874	-	LOC_Os01g14100
chr01	7896586	7896853	BreakDancer:Pindel	score=99;PE=22:SR=10;score=27	mRNA	7894961	7900874	-	LOC_Os01g14100.1
chr01	7896586	7896853	BreakDancer:Pindel	score=99;PE=22:SR=10;score=27	mRNA	7894961	7900874	-	LOC_Os01g14100.2
chr01	7896586	7896853	BreakDancer:Pindel	score=99;PE=22:SR=10;score=27	mRNA	7894959	7900874	-	LOC_Os01g14100.3
chr01	8673607	8674818	BreakDancer:DELLY:CNVnator:SVseq2:Lumpy:softSearch	score=99;PE=19:PE=20;SR=4:eval1=207.963;eval2=8.94375e-05;eval3=1;eval4=1:SR=4:SU=8:nr=21;sc=5	NA	NA	NA	NA	NA
chr01	8744539	8745425	BreakDancer:DELLY:Lumpy	score=99;PE=7:PE=9;SR=0:SU=4	NA	NA	NA	NA	NA
chr01	8750623	8751119	BreakDancer:DELLY:Lumpy	score=99;PE=9:PE=9;SR=0:SU=6	gene	8751071	8755448	+	LOC_Os01g15580
chr01	8750623	8751119	BreakDancer:DELLY:Lumpy	score=99;PE=9:PE=9;SR=0:SU=6	mRNA	8751071	8755448	+	LOC_Os01g15580.1
chr01	8750623	8751119	BreakDancer:DELLY:Lumpy	score=99;PE=9:PE=9;SR=0:SU=6	exon	8751071	8755448	+	LOC_Os01g15580.1:exon_1
chr01	8750623	8751119	BreakDancer:DELLY:Lumpy	score=99;PE=9:PE=9;SR=0:SU=6	five_prime_UTR	8751071	8751152	+	LOC_Os01g15580.1:utr_1
chr01	8774637	8781474	BreakDancer:Pindel:DELLY:SVseq2:Lumpy	score=99;PE=17:SR=10;score=27:PE=15;SR=0:SR=3:SU=6	gene	8775599	8780615	+	LOC_Os01g15620
chr01	8774637	8781474	BreakDancer:Pindel:DELLY:SVseq2:Lumpy	score=99;PE=17:SR=10;score=27:PE=15;SR=0:SR=3:SU=6	mRNA	8775599	8780615	+	LOC_Os01g15620.1
chr01	8774637	8781474	BreakDancer:Pindel:DELLY:SVseq2:Lumpy	score=99;PE=17:SR=10;score=27:PE=15;SR=0:SR=3:SU=6	exon	8775599	8777560	+	LOC_Os01g15620.1:exon_1
chr01	8774637	8781474	BreakDancer:Pindel:DELLY:SVseq2:Lumpy	score=99;PE=17:SR=10;score=27:PE=15;SR=0:SR=3:SU=6	exon	8777645	8778055	+	LOC_Os01g15620.1:exon_2
chr01	8774637	8781474	BreakDancer:Pindel:DELLY:SVseq2:Lumpy	score=99;PE=17:SR=10;score=27:PE=15;SR=0:SR=3:SU=6	exon	8778147	8778445	+	LOC_Os01g15620.1:exon_3
chr01	8774637	8781474	BreakDancer:Pindel:DELLY:SVseq2:Lumpy	score=99;PE=17:SR=10;score=27:PE=15;SR=0:SR=3:SU=6	exon	8778522	8778780	+	LOC_Os01g15620.1:exon_4
chr01	8774637	8781474	BreakDancer:Pindel:DELLY:SVseq2:Lumpy	score=99;PE=17:SR=10;score=27:PE=15;SR=0:SR=3:SU=6	exon	8778873	8779055	+	LOC_Os01g15620.1:exon_5
chr01	8774637	8781474	BreakDancer:Pindel:DELLY:SVseq2:Lumpy	score=99;PE=17:SR=10;score=27:PE=15;SR=0:SR=3:SU=6	exon	8779213	8779278	+	LOC_Os01g15620.1:exon_6
chr01	8774637	8781474	BreakDancer:Pindel:DELLY:SVseq2:Lumpy	score=99;PE=17:SR=10;score=27:PE=15;SR=0:SR=3:SU=6	exon	8779564	8779638	+	LOC_Os01g15620.1:exon_7
chr01	8774637	8781474	BreakDancer:Pindel:DELLY:SVseq2:Lumpy	score=99;PE=17:SR=10;score=27:PE=15;SR=0:SR=3:SU=6	exon	8779715	8779873	+	LOC_Os01g15620.1:exon_8
chr01	8774637	8781474	BreakDancer:Pindel:DELLY:SVseq2:Lumpy	score=99;PE=17:SR=10;score=27:PE=15;SR=0:SR=3:SU=6	exon	8780469	8780615	+	LOC_Os01g15620.1:exon_9
chr01	8774637	8781474	BreakDancer:Pindel:DELLY:SVseq2:Lumpy	score=99;PE=17:SR=10;score=27:PE=15;SR=0:SR=3:SU=6	CDS	8775599	8777560	+	LOC_Os01g15620.1:cds_1
chr01	8774637	8781474	BreakDancer:Pindel:DELLY:SVseq2:Lumpy	score=99;PE=17:SR=10;score=27:PE=15;SR=0:SR=3:SU=6	CDS	8777645	8778055	+	LOC_Os01g15620.1:cds_2
chr01	8774637	8781474	BreakDancer:Pindel:DELLY:SVseq2:Lumpy	score=99;PE=17:SR=10;score=27:PE=15;SR=0:SR=3:SU=6	CDS	8778147	8778445	+	LOC_Os01g15620.1:cds_3
chr01	8774637	8781474	BreakDancer:Pindel:DELLY:SVseq2:Lumpy	score=99;PE=17:SR=10;score=27:PE=15;SR=0:SR=3:SU=6	CDS	8778522	8778780	+	LOC_Os01g15620.1:cds_4
chr01	8774637	8781474	BreakDancer:Pindel:DELLY:SVseq2:Lumpy	score=99;PE=17:SR=10;score=27:PE=15;SR=0:SR=3:SU=6	CDS	8778873	8779055	+	LOC_Os01g15620.1:cds_5
chr01	8774637	8781474	BreakDancer:Pindel:DELLY:SVseq2:Lumpy	score=99;PE=17:SR=10;score=27:PE=15;SR=0:SR=3:SU=6	CDS	8779213	8779278	+	LOC_Os01g15620.1:cds_6
chr01	8774637	8781474	BreakDancer:Pindel:DELLY:SVseq2:Lumpy	score=99;PE=17:SR=10;score=27:PE=15;SR=0:SR=3:SU=6	CDS	8779564	8779638	+	LOC_Os01g15620.1:cds_7
chr01	8774637	8781474	BreakDancer:Pindel:DELLY:SVseq2:Lumpy	score=99;PE=17:SR=10;score=27:PE=15;SR=0:SR=3:SU=6	CDS	8779715	8779873	+	LOC_Os01g15620.1:cds_8
chr01	8774637	8781474	BreakDancer:Pindel:DELLY:SVseq2:Lumpy	score=99;PE=17:SR=10;score=27:PE=15;SR=0:SR=3:SU=6	CDS	8780469	8780615	+	LOC_Os01g15620.1:cds_9
chr01	8862557	8875566	BreakDancer:Pindel:DELLY:Lumpy	score=99;PE=12:SR=4;score=8:PE=12;SR=6:SU=4	CDS	8865626	8867561	+	LOC_Os01g15750.1:cds_3
chr01	8862557	8875566	BreakDancer:Pindel:DELLY:Lumpy	score=99;PE=12:SR=4;score=8:PE=12;SR=6:SU=4	gene	8868190	8874344	-	LOC_Os01g15760
chr01	8862557	8875566	BreakDancer:Pindel:DELLY:Lumpy	score=99;PE=12:SR=4;score=8:PE=12;SR=6:SU=4	mRNA	8868190	8874344	-	LOC_Os01g15760.1
chr01	8862557	8875566	BreakDancer:Pindel:DELLY:Lumpy	score=99;PE=12:SR=4;score=8:PE=12;SR=6:SU=4	exon	8873789	8874344	-	LOC_Os01g15760.1:exon_1
chr01	8862557	8875566	BreakDancer:Pindel:DELLY:Lumpy	score=99;PE=12:SR=4;score=8:PE=12;SR=6:SU=4	exon	8871990	8873326	-	LOC_Os01g15760.1:exon_2
chr01	8862557	8875566	BreakDancer:Pindel:DELLY:Lumpy	score=99;PE=12:SR=4;score=8:PE=12;SR=6:SU=4	exon	8871084	8871917	-	LOC_Os01g15760.1:exon_3
chr01	8862557	8875566	BreakDancer:Pindel:DELLY:Lumpy	score=99;PE=12:SR=4;score=8:PE=12;SR=6:SU=4	gene	8864271	8867561	+	LOC_Os01g15750
chr01	8862557	8875566	BreakDancer:Pindel:DELLY:Lumpy	score=99;PE=12:SR=4;score=8:PE=12;SR=6:SU=4	mRNA	8864271	8867561	+	LOC_Os01g15750.1
chr01	8862557	8875566	BreakDancer:Pindel:DELLY:Lumpy	score=99;PE=12:SR=4;score=8:PE=12;SR=6:SU=4	exon	8864271	8864918	+	LOC_Os01g15750.1:exon_1
chr01	8862557	8875566	BreakDancer:Pindel:DELLY:Lumpy	score=99;PE=12:SR=4;score=8:PE=12;SR=6:SU=4	exon	8865020	8865531	+	LOC_Os01g15750.1:exon_2
chr01	8862557	8875566	BreakDancer:Pindel:DELLY:Lumpy	score=99;PE=12:SR=4;score=8:PE=12;SR=6:SU=4	exon	8865626	8867561	+	LOC_Os01g15750.1:exon_3
chr01	8862557	8875566	BreakDancer:Pindel:DELLY:Lumpy	score=99;PE=12:SR=4;score=8:PE=12;SR=6:SU=4	CDS	8864271	8864918	+	LOC_Os01g15750.1:cds_1
chr01	8862557	8875566	BreakDancer:Pindel:DELLY:Lumpy	score=99;PE=12:SR=4;score=8:PE=12;SR=6:SU=4	CDS	8865020	8865531	+	LOC_Os01g15750.1:cds_2
chr01	8862557	8875566	BreakDancer:Pindel:DELLY:Lumpy	score=99;PE=12:SR=4;score=8:PE=12;SR=6:SU=4	CDS	8873789	8874344	-	LOC_Os01g15760.1:cds_1
chr01	8862557	8875566	BreakDancer:Pindel:DELLY:Lumpy	score=99;PE=12:SR=4;score=8:PE=12;SR=6:SU=4	CDS	8871990	8873326	-	LOC_Os01g15760.1:cds_2
chr01	8862557	8875566	BreakDancer:Pindel:DELLY:Lumpy	score=99;PE=12:SR=4;score=8:PE=12;SR=6:SU=4	exon	8869777	8870985	-	LOC_Os01g15760.1:exon_4
chr01	8862557	8875566	BreakDancer:Pindel:DELLY:Lumpy	score=99;PE=12:SR=4;score=8:PE=12;SR=6:SU=4	exon	8868190	8869710	-	LOC_Os01g15760.1:exon_5
chr01	8862557	8875566	BreakDancer:Pindel:DELLY:Lumpy	score=99;PE=12:SR=4;score=8:PE=12;SR=6:SU=4	CDS	8868190	8869710	-	LOC_Os01g15760.1:cds_5
chr01	8862557	8875566	BreakDancer:Pindel:DELLY:Lumpy	score=99;PE=12:SR=4;score=8:PE=12;SR=6:SU=4	CDS	8871084	8871917	-	LOC_Os01g15760.1:cds_3
chr01	8862557	8875566	BreakDancer:Pindel:DELLY:Lumpy	score=99;PE=12:SR=4;score=8:PE=12;SR=6:SU=4	CDS	8869777	8870985	-	LOC_Os01g15760.1:cds_4
chr01	8822616	8827638	Pindel:DELLY	SR=3;score=4:PE=3;SR=0	mRNA	8822990	8828178	-	LOC_Os01g15690.1
chr01	8822616	8827638	Pindel:DELLY	SR=3;score=4:PE=3;SR=0	gene	8822990	8828178	-	LOC_Os01g15690
chr01	8822616	8827638	Pindel:DELLY	SR=3;score=4:PE=3;SR=0	CDS	8822990	8823892	-	LOC_Os01g15690.1:cds_3
chr01	8822616	8827638	Pindel:DELLY	SR=3;score=4:PE=3;SR=0	exon	8823990	8827289	-	LOC_Os01g15690.1:exon_2
chr01	8822616	8827638	Pindel:DELLY	SR=3;score=4:PE=3;SR=0	exon	8822990	8823892	-	LOC_Os01g15690.1:exon_3
chr01	8822616	8827638	Pindel:DELLY	SR=3;score=4:PE=3;SR=0	CDS	8823990	8827289	-	LOC_Os01g15690.1:cds_2
chr01	8886085	8886368	BreakDancer:Pindel:DELLY	score=99;PE=14:SR=7;score=18:PE=13;SR=0	gene	8885505	8892462	-	LOC_Os01g15780
chr01	8886085	8886368	BreakDancer:Pindel:DELLY	score=99;PE=14:SR=7;score=18:PE=13;SR=0	mRNA	8885505	8892462	-	LOC_Os01g15780.1
chr01	8973475	8977950	BreakDancer:DELLY:Lumpy	score=99;PE=6:PE=7;SR=0:SU=4	gene	8973604	8978182	-	LOC_Os01g15934
chr01	8973475	8977950	BreakDancer:DELLY:Lumpy	score=99;PE=6:PE=7;SR=0:SU=4	mRNA	8973604	8978182	-	LOC_Os01g15934.1
chr01	8973475	8977950	BreakDancer:DELLY:Lumpy	score=99;PE=6:PE=7;SR=0:SU=4	exon	8977298	8977342	-	LOC_Os01g15934.1:exon_2
chr01	8973475	8977950	BreakDancer:DELLY:Lumpy	score=99;PE=6:PE=7;SR=0:SU=4	exon	8977126	8977220	-	LOC_Os01g15934.1:exon_3
chr01	8973475	8977950	BreakDancer:DELLY:Lumpy	score=99;PE=6:PE=7;SR=0:SU=4	exon	8975858	8975960	-	LOC_Os01g15934.1:exon_4
chr01	8973475	8977950	BreakDancer:DELLY:Lumpy	score=99;PE=6:PE=7;SR=0:SU=4	exon	8975656	8975741	-	LOC_Os01g15934.1:exon_5
chr01	8973475	8977950	BreakDancer:DELLY:Lumpy	score=99;PE=6:PE=7;SR=0:SU=4	exon	8974950	8975085	-	LOC_Os01g15934.1:exon_6
chr01	8973475	8977950	BreakDancer:DELLY:Lumpy	score=99;PE=6:PE=7;SR=0:SU=4	exon	8974008	8974901	-	LOC_Os01g15934.1:exon_7
chr01	8973475	8977950	BreakDancer:DELLY:Lumpy	score=99;PE=6:PE=7;SR=0:SU=4	exon	8973604	8973725	-	LOC_Os01g15934.1:exon_8
chr01	8973475	8977950	BreakDancer:DELLY:Lumpy	score=99;PE=6:PE=7;SR=0:SU=4	CDS	8977298	8977342	-	LOC_Os01g15934.1:cds_2
chr01	8973475	8977950	BreakDancer:DELLY:Lumpy	score=99;PE=6:PE=7;SR=0:SU=4	CDS	8977126	8977220	-	LOC_Os01g15934.1:cds_3
chr01	8973475	8977950	BreakDancer:DELLY:Lumpy	score=99;PE=6:PE=7;SR=0:SU=4	CDS	8975858	8975960	-	LOC_Os01g15934.1:cds_4
chr01	8973475	8977950	BreakDancer:DELLY:Lumpy	score=99;PE=6:PE=7;SR=0:SU=4	CDS	8975656	8975741	-	LOC_Os01g15934.1:cds_5
chr01	8973475	8977950	BreakDancer:DELLY:Lumpy	score=99;PE=6:PE=7;SR=0:SU=4	CDS	8974950	8975085	-	LOC_Os01g15934.1:cds_6
chr01	8973475	8977950	BreakDancer:DELLY:Lumpy	score=99;PE=6:PE=7;SR=0:SU=4	CDS	8974008	8974901	-	LOC_Os01g15934.1:cds_7
chr01	8973475	8977950	BreakDancer:DELLY:Lumpy	score=99;PE=6:PE=7;SR=0:SU=4	CDS	8973604	8973725	-	LOC_Os01g15934.1:cds_8
chr01	9188354	9188562	BreakDancer:Pindel:SVseq2	score=99;PE=21:SR=6;score=7:SR=4	NA	NA	NA	NA	NA
chr01	9210630	9210755	BreakDancer:Pindel	score=99;PE=14:SR=3;score=6	gene	9203963	9211788	-	LOC_Os01g16260
chr01	9210630	9210755	BreakDancer:Pindel	score=99;PE=14:SR=3;score=6	mRNA	9203963	9211788	-	LOC_Os01g16260.1
chr01	9210630	9210755	BreakDancer:Pindel	score=99;PE=14:SR=3;score=6	mRNA	9203963	9211788	-	LOC_Os01g16260.2
chr01	9210630	9210755	BreakDancer:Pindel	score=99;PE=14:SR=3;score=6	mRNA	9206917	9211788	-	LOC_Os01g16260.3
chr01	9214591	9220994	BreakDancer:Pindel:DELLY	score=99;PE=8:SR=3;score=6:PE=9;SR=0	gene	9215675	9219481	+	LOC_Os01g16270
chr01	9214591	9220994	BreakDancer:Pindel:DELLY	score=99;PE=8:SR=3;score=6:PE=9;SR=0	mRNA	9215675	9219481	+	LOC_Os01g16270.1
chr01	9214591	9220994	BreakDancer:Pindel:DELLY	score=99;PE=8:SR=3;score=6:PE=9;SR=0	exon	9215675	9219481	+	LOC_Os01g16270.1:exon_1
chr01	9214591	9220994	BreakDancer:Pindel:DELLY	score=99;PE=8:SR=3;score=6:PE=9;SR=0	CDS	9215675	9219481	+	LOC_Os01g16270.1:cds_1
chr01	9531568	9544432	BreakDancer:Pindel:DELLY:SVseq2	score=99;PE=9:SR=7;score=18:PE=9;SR=0:SR=3	gene	9533161	9536453	+	LOC_Os01g16780
chr01	9531568	9544432	BreakDancer:Pindel:DELLY:SVseq2	score=99;PE=9:SR=7;score=18:PE=9;SR=0:SR=3	mRNA	9533161	9536453	+	LOC_Os01g16780.1
chr01	9531568	9544432	BreakDancer:Pindel:DELLY:SVseq2	score=99;PE=9:SR=7;score=18:PE=9;SR=0:SR=3	exon	9533161	9533648	+	LOC_Os01g16780.1:exon_1
chr01	9531568	9544432	BreakDancer:Pindel:DELLY:SVseq2	score=99;PE=9:SR=7;score=18:PE=9;SR=0:SR=3	exon	9534061	9534423	+	LOC_Os01g16780.1:exon_2
chr01	9531568	9544432	BreakDancer:Pindel:DELLY:SVseq2	score=99;PE=9:SR=7;score=18:PE=9;SR=0:SR=3	exon	9534518	9536453	+	LOC_Os01g16780.1:exon_3
chr01	9531568	9544432	BreakDancer:Pindel:DELLY:SVseq2	score=99;PE=9:SR=7;score=18:PE=9;SR=0:SR=3	CDS	9533161	9533648	+	LOC_Os01g16780.1:cds_1
chr01	9531568	9544432	BreakDancer:Pindel:DELLY:SVseq2	score=99;PE=9:SR=7;score=18:PE=9;SR=0:SR=3	CDS	9534061	9534423	+	LOC_Os01g16780.1:cds_2
chr01	9531568	9544432	BreakDancer:Pindel:DELLY:SVseq2	score=99;PE=9:SR=7;score=18:PE=9;SR=0:SR=3	CDS	9534518	9536453	+	LOC_Os01g16780.1:cds_3
chr01	9531568	9544432	BreakDancer:Pindel:DELLY:SVseq2	score=99;PE=9:SR=7;score=18:PE=9;SR=0:SR=3	gene	9537227	9543236	-	LOC_Os01g16790
chr01	9531568	9544432	BreakDancer:Pindel:DELLY:SVseq2	score=99;PE=9:SR=7;score=18:PE=9;SR=0:SR=3	mRNA	9537227	9543236	-	LOC_Os01g16790.1
chr01	9531568	9544432	BreakDancer:Pindel:DELLY:SVseq2	score=99;PE=9:SR=7;score=18:PE=9;SR=0:SR=3	exon	9542150	9543236	-	LOC_Os01g16790.1:exon_1
chr01	9531568	9544432	BreakDancer:Pindel:DELLY:SVseq2	score=99;PE=9:SR=7;score=18:PE=9;SR=0:SR=3	exon	9540830	9542011	-	LOC_Os01g16790.1:exon_2
chr01	9531568	9544432	BreakDancer:Pindel:DELLY:SVseq2	score=99;PE=9:SR=7;score=18:PE=9;SR=0:SR=3	exon	9539590	9540687	-	LOC_Os01g16790.1:exon_3
chr01	9531568	9544432	BreakDancer:Pindel:DELLY:SVseq2	score=99;PE=9:SR=7;score=18:PE=9;SR=0:SR=3	exon	9537227	9539397	-	LOC_Os01g16790.1:exon_4
chr01	9531568	9544432	BreakDancer:Pindel:DELLY:SVseq2	score=99;PE=9:SR=7;score=18:PE=9;SR=0:SR=3	CDS	9542150	9543236	-	LOC_Os01g16790.1:cds_1
chr01	9531568	9544432	BreakDancer:Pindel:DELLY:SVseq2	score=99;PE=9:SR=7;score=18:PE=9;SR=0:SR=3	CDS	9540830	9542011	-	LOC_Os01g16790.1:cds_2
chr01	9531568	9544432	BreakDancer:Pindel:DELLY:SVseq2	score=99;PE=9:SR=7;score=18:PE=9;SR=0:SR=3	CDS	9539590	9540687	-	LOC_Os01g16790.1:cds_3
chr01	9531568	9544432	BreakDancer:Pindel:DELLY:SVseq2	score=99;PE=9:SR=7;score=18:PE=9;SR=0:SR=3	CDS	9537227	9539397	-	LOC_Os01g16790.1:cds_4
chr01	9573900	9580417	BreakDancer:Pindel:DELLY:Lumpy	score=99;PE=9:SR=9;score=28:PE=9;SR=0:SU=4	gene	9574974	9578914	+	LOC_Os01g16820
chr01	9573900	9580417	BreakDancer:Pindel:DELLY:Lumpy	score=99;PE=9:SR=9;score=28:PE=9;SR=0:SU=4	mRNA	9574974	9578914	+	LOC_Os01g16820.1
chr01	9573900	9580417	BreakDancer:Pindel:DELLY:Lumpy	score=99;PE=9:SR=9;score=28:PE=9;SR=0:SU=4	exon	9574974	9578669	+	LOC_Os01g16820.1:exon_1
chr01	9573900	9580417	BreakDancer:Pindel:DELLY:Lumpy	score=99;PE=9:SR=9;score=28:PE=9;SR=0:SU=4	exon	9578717	9578914	+	LOC_Os01g16820.1:exon_2
chr01	9573900	9580417	BreakDancer:Pindel:DELLY:Lumpy	score=99;PE=9:SR=9;score=28:PE=9;SR=0:SU=4	CDS	9574974	9578669	+	LOC_Os01g16820.1:cds_1
chr01	9573900	9580417	BreakDancer:Pindel:DELLY:Lumpy	score=99;PE=9:SR=9;score=28:PE=9;SR=0:SU=4	CDS	9578717	9578914	+	LOC_Os01g16820.1:cds_2
chr01	9584974	9585226	BreakDancer:Pindel	score=99;PE=14:SR=9;score=24	NA	NA	NA	NA	NA
chr01	9788814	9789024	BreakDancer:Pindel	score=99;PE=6:SR=5;score=12	NA	NA	NA	NA	NA
chr01	9886846	9887369	BreakDancer:Pindel:DELLY:SVseq2:Lumpy	score=99;PE=20:SR=8;score=21:PE=18;SR=7:SR=3:SU=7	NA	NA	NA	NA	NA
chr01	9910444	9910608	BreakDancer:Pindel	score=99;PE=10:SR=6;score=12	NA	NA	NA	NA	NA
chr01	9929457	9929710	BreakDancer:Pindel	score=99;PE=10:SR=5;score=10	gene	9928866	9935981	+	LOC_Os01g17260
chr01	9929457	9929710	BreakDancer:Pindel	score=99;PE=10:SR=5;score=10	mRNA	9928866	9935981	+	LOC_Os01g17260.1
chr01	9929457	9929710	BreakDancer:Pindel	score=99;PE=10:SR=5;score=10	mRNA	9928866	9935981	+	LOC_Os01g17260.2
chr01	9989007	10002002	BreakDancer:DELLY:Lumpy	score=99;PE=13:PE=13;SR=0:SU=5	gene	9990370	9996046	+	LOC_Os01g17360
chr01	9989007	10002002	BreakDancer:DELLY:Lumpy	score=99;PE=13:PE=13;SR=0:SU=5	mRNA	9990370	9996046	+	LOC_Os01g17360.1
chr01	9989007	10002002	BreakDancer:DELLY:Lumpy	score=99;PE=13:PE=13;SR=0:SU=5	exon	9990370	9990876	+	LOC_Os01g17360.1:exon_1
chr01	9989007	10002002	BreakDancer:DELLY:Lumpy	score=99;PE=13:PE=13;SR=0:SU=5	exon	9991076	9991969	+	LOC_Os01g17360.1:exon_2
chr01	9989007	10002002	BreakDancer:DELLY:Lumpy	score=99;PE=13:PE=13;SR=0:SU=5	exon	9992003	9992497	+	LOC_Os01g17360.1:exon_3
chr01	9989007	10002002	BreakDancer:DELLY:Lumpy	score=99;PE=13:PE=13;SR=0:SU=5	exon	9992536	9992721	+	LOC_Os01g17360.1:exon_4
chr01	9989007	10002002	BreakDancer:DELLY:Lumpy	score=99;PE=13:PE=13;SR=0:SU=5	exon	9992794	9993167	+	LOC_Os01g17360.1:exon_5
chr01	9989007	10002002	BreakDancer:DELLY:Lumpy	score=99;PE=13:PE=13;SR=0:SU=5	exon	9993661	9994498	+	LOC_Os01g17360.1:exon_6
chr01	9989007	10002002	BreakDancer:DELLY:Lumpy	score=99;PE=13:PE=13;SR=0:SU=5	exon	9994589	9996046	+	LOC_Os01g17360.1:exon_7
chr01	9989007	10002002	BreakDancer:DELLY:Lumpy	score=99;PE=13:PE=13;SR=0:SU=5	CDS	9990370	9990876	+	LOC_Os01g17360.1:cds_1
chr01	9989007	10002002	BreakDancer:DELLY:Lumpy	score=99;PE=13:PE=13;SR=0:SU=5	CDS	9991076	9991969	+	LOC_Os01g17360.1:cds_2
chr01	9989007	10002002	BreakDancer:DELLY:Lumpy	score=99;PE=13:PE=13;SR=0:SU=5	CDS	9992003	9992497	+	LOC_Os01g17360.1:cds_3
chr01	9989007	10002002	BreakDancer:DELLY:Lumpy	score=99;PE=13:PE=13;SR=0:SU=5	CDS	9992536	9992721	+	LOC_Os01g17360.1:cds_4
chr01	9989007	10002002	BreakDancer:DELLY:Lumpy	score=99;PE=13:PE=13;SR=0:SU=5	CDS	9992794	9993167	+	LOC_Os01g17360.1:cds_5
chr01	9989007	10002002	BreakDancer:DELLY:Lumpy	score=99;PE=13:PE=13;SR=0:SU=5	CDS	9993661	9994498	+	LOC_Os01g17360.1:cds_6
chr01	9989007	10002002	BreakDancer:DELLY:Lumpy	score=99;PE=13:PE=13;SR=0:SU=5	CDS	9994589	9996046	+	LOC_Os01g17360.1:cds_7
chr01	9989007	10002002	BreakDancer:DELLY:Lumpy	score=99;PE=13:PE=13;SR=0:SU=5	gene	9997588	10000126	-	LOC_Os01g17370
chr01	9989007	10002002	BreakDancer:DELLY:Lumpy	score=99;PE=13:PE=13;SR=0:SU=5	mRNA	9997588	10000126	-	LOC_Os01g17370.1
chr01	9989007	10002002	BreakDancer:DELLY:Lumpy	score=99;PE=13:PE=13;SR=0:SU=5	exon	9999023	10000126	-	LOC_Os01g17370.1:exon_1
chr01	9989007	10002002	BreakDancer:DELLY:Lumpy	score=99;PE=13:PE=13;SR=0:SU=5	exon	9997588	9998778	-	LOC_Os01g17370.1:exon_2
chr01	9989007	10002002	BreakDancer:DELLY:Lumpy	score=99;PE=13:PE=13;SR=0:SU=5	CDS	9999023	10000126	-	LOC_Os01g17370.1:cds_1
chr01	9989007	10002002	BreakDancer:DELLY:Lumpy	score=99;PE=13:PE=13;SR=0:SU=5	CDS	9997588	9998778	-	LOC_Os01g17370.1:cds_2
chr01	9989007	10002002	BreakDancer:DELLY:Lumpy	score=99;PE=13:PE=13;SR=0:SU=5	gene	10001066	10001392	-	LOC_Os01g17380
chr01	9989007	10002002	BreakDancer:DELLY:Lumpy	score=99;PE=13:PE=13;SR=0:SU=5	mRNA	10001066	10001392	-	LOC_Os01g17380.1
chr01	9989007	10002002	BreakDancer:DELLY:Lumpy	score=99;PE=13:PE=13;SR=0:SU=5	exon	10001066	10001392	-	LOC_Os01g17380.1:exon_1
chr01	9989007	10002002	BreakDancer:DELLY:Lumpy	score=99;PE=13:PE=13;SR=0:SU=5	CDS	10001066	10001392	-	LOC_Os01g17380.1:cds_1
chr01	10030341	10042895	BreakDancer:DELLY:Lumpy	score=99;PE=7:PE=7;SR=0:SU=4	gene	10028443	10031012	+	LOC_Os01g17440
chr01	10030341	10042895	BreakDancer:DELLY:Lumpy	score=99;PE=7:PE=7;SR=0:SU=4	mRNA	10028443	10031012	+	LOC_Os01g17440.1
chr01	10030341	10042895	BreakDancer:DELLY:Lumpy	score=99;PE=7:PE=7;SR=0:SU=4	exon	10030736	10031012	+	LOC_Os01g17440.1:exon_3
chr01	10030341	10042895	BreakDancer:DELLY:Lumpy	score=99;PE=7:PE=7;SR=0:SU=4	CDS	10030736	10031012	+	LOC_Os01g17440.1:cds_3
chr01	10030341	10042895	BreakDancer:DELLY:Lumpy	score=99;PE=7:PE=7;SR=0:SU=4	gene	10031981	10035223	+	LOC_Os01g17450
chr01	10030341	10042895	BreakDancer:DELLY:Lumpy	score=99;PE=7:PE=7;SR=0:SU=4	mRNA	10031981	10035223	+	LOC_Os01g17450.1
chr01	10030341	10042895	BreakDancer:DELLY:Lumpy	score=99;PE=7:PE=7;SR=0:SU=4	exon	10031981	10032008	+	LOC_Os01g17450.1:exon_1
chr01	10030341	10042895	BreakDancer:DELLY:Lumpy	score=99;PE=7:PE=7;SR=0:SU=4	exon	10032236	10032307	+	LOC_Os01g17450.1:exon_2
chr01	10030341	10042895	BreakDancer:DELLY:Lumpy	score=99;PE=7:PE=7;SR=0:SU=4	exon	10032611	10033240	+	LOC_Os01g17450.1:exon_3
chr01	10030341	10042895	BreakDancer:DELLY:Lumpy	score=99;PE=7:PE=7;SR=0:SU=4	exon	10033344	10035223	+	LOC_Os01g17450.1:exon_4
chr01	10030341	10042895	BreakDancer:DELLY:Lumpy	score=99;PE=7:PE=7;SR=0:SU=4	CDS	10031981	10032008	+	LOC_Os01g17450.1:cds_1
chr01	10030341	10042895	BreakDancer:DELLY:Lumpy	score=99;PE=7:PE=7;SR=0:SU=4	CDS	10032236	10032307	+	LOC_Os01g17450.1:cds_2
chr01	10030341	10042895	BreakDancer:DELLY:Lumpy	score=99;PE=7:PE=7;SR=0:SU=4	CDS	10032611	10033240	+	LOC_Os01g17450.1:cds_3
chr01	10030341	10042895	BreakDancer:DELLY:Lumpy	score=99;PE=7:PE=7;SR=0:SU=4	CDS	10033344	10035223	+	LOC_Os01g17450.1:cds_4
chr01	10030341	10042895	BreakDancer:DELLY:Lumpy	score=99;PE=7:PE=7;SR=0:SU=4	gene	10035844	10041807	-	LOC_Os01g17460
chr01	10030341	10042895	BreakDancer:DELLY:Lumpy	score=99;PE=7:PE=7;SR=0:SU=4	mRNA	10035844	10041807	-	LOC_Os01g17460.1
chr01	10030341	10042895	BreakDancer:DELLY:Lumpy	score=99;PE=7:PE=7;SR=0:SU=4	exon	10039453	10041807	-	LOC_Os01g17460.1:exon_1
chr01	10030341	10042895	BreakDancer:DELLY:Lumpy	score=99;PE=7:PE=7;SR=0:SU=4	exon	10035844	10039380	-	LOC_Os01g17460.1:exon_2
chr01	10030341	10042895	BreakDancer:DELLY:Lumpy	score=99;PE=7:PE=7;SR=0:SU=4	CDS	10039453	10041807	-	LOC_Os01g17460.1:cds_1
chr01	10030341	10042895	BreakDancer:DELLY:Lumpy	score=99;PE=7:PE=7;SR=0:SU=4	CDS	10035844	10039380	-	LOC_Os01g17460.1:cds_2
chr01	10070756	10077189	BreakDancer:Pindel:DELLY	score=99;PE=6:SR=9;score=30:PE=10;SR=0	gene	10071411	10076360	-	LOC_Os01g18000
chr01	10070756	10077189	BreakDancer:Pindel:DELLY	score=99;PE=6:SR=9;score=30:PE=10;SR=0	mRNA	10071411	10076360	-	LOC_Os01g18000.1
chr01	10070756	10077189	BreakDancer:Pindel:DELLY	score=99;PE=6:SR=9;score=30:PE=10;SR=0	exon	10076180	10076360	-	LOC_Os01g18000.1:exon_1
chr01	10070756	10077189	BreakDancer:Pindel:DELLY	score=99;PE=6:SR=9;score=30:PE=10;SR=0	exon	10074364	10075591	-	LOC_Os01g18000.1:exon_2
chr01	10070756	10077189	BreakDancer:Pindel:DELLY	score=99;PE=6:SR=9;score=30:PE=10;SR=0	exon	10071411	10074225	-	LOC_Os01g18000.1:exon_3
chr01	10070756	10077189	BreakDancer:Pindel:DELLY	score=99;PE=6:SR=9;score=30:PE=10;SR=0	CDS	10076180	10076360	-	LOC_Os01g18000.1:cds_1
chr01	10070756	10077189	BreakDancer:Pindel:DELLY	score=99;PE=6:SR=9;score=30:PE=10;SR=0	CDS	10074364	10075591	-	LOC_Os01g18000.1:cds_2
chr01	10070756	10077189	BreakDancer:Pindel:DELLY	score=99;PE=6:SR=9;score=30:PE=10;SR=0	CDS	10071411	10074225	-	LOC_Os01g18000.1:cds_3
chr01	10165886	10166220	BreakDancer:DELLY	score=99;PE=6:PE=10;SR=0	NA	NA	NA	NA	NA
chr01	10170635	10170863	BreakDancer:DELLY:SVseq2	score=99;PE=7:PE=0;SR=4:SR=5	NA	NA	NA	NA	NA
chr01	10190166	10190404	BreakDancer:Pindel	score=99;PE=10:SR=6;score=12	NA	NA	NA	NA	NA
chr01	10219846	10220856	BreakDancer:DELLY:Lumpy	score=99;PE=25:PE=22;SR=0:SU=10	NA	NA	NA	NA	NA
chr01	10247715	10259011	BreakDancer:Pindel:DELLY:SVseq2:Lumpy	score=99;PE=12:SR=6;score=15:PE=12;SR=0:SR=4:SU=4	gene	10248085	10251783	-	LOC_Os01g18260
chr01	10247715	10259011	BreakDancer:Pindel:DELLY:SVseq2:Lumpy	score=99;PE=12:SR=6;score=15:PE=12;SR=0:SR=4:SU=4	mRNA	10248085	10251783	-	LOC_Os01g18260.1
chr01	10247715	10259011	BreakDancer:Pindel:DELLY:SVseq2:Lumpy	score=99;PE=12:SR=6;score=15:PE=12;SR=0:SR=4:SU=4	exon	10251540	10251783	-	LOC_Os01g18260.1:exon_1
chr01	10247715	10259011	BreakDancer:Pindel:DELLY:SVseq2:Lumpy	score=99;PE=12:SR=6;score=15:PE=12;SR=0:SR=4:SU=4	exon	10250482	10251461	-	LOC_Os01g18260.1:exon_2
chr01	10247715	10259011	BreakDancer:Pindel:DELLY:SVseq2:Lumpy	score=99;PE=12:SR=6;score=15:PE=12;SR=0:SR=4:SU=4	exon	10250146	10250287	-	LOC_Os01g18260.1:exon_3
chr01	10247715	10259011	BreakDancer:Pindel:DELLY:SVseq2:Lumpy	score=99;PE=12:SR=6;score=15:PE=12;SR=0:SR=4:SU=4	exon	10249530	10250096	-	LOC_Os01g18260.1:exon_4
chr01	10247715	10259011	BreakDancer:Pindel:DELLY:SVseq2:Lumpy	score=99;PE=12:SR=6;score=15:PE=12;SR=0:SR=4:SU=4	exon	10249190	10249466	-	LOC_Os01g18260.1:exon_5
chr01	10247715	10259011	BreakDancer:Pindel:DELLY:SVseq2:Lumpy	score=99;PE=12:SR=6;score=15:PE=12;SR=0:SR=4:SU=4	exon	10248907	10249080	-	LOC_Os01g18260.1:exon_6
chr01	10247715	10259011	BreakDancer:Pindel:DELLY:SVseq2:Lumpy	score=99;PE=12:SR=6;score=15:PE=12;SR=0:SR=4:SU=4	exon	10248700	10248810	-	LOC_Os01g18260.1:exon_7
chr01	10247715	10259011	BreakDancer:Pindel:DELLY:SVseq2:Lumpy	score=99;PE=12:SR=6;score=15:PE=12;SR=0:SR=4:SU=4	exon	10248543	10248615	-	LOC_Os01g18260.1:exon_8
chr01	10247715	10259011	BreakDancer:Pindel:DELLY:SVseq2:Lumpy	score=99;PE=12:SR=6;score=15:PE=12;SR=0:SR=4:SU=4	exon	10248350	10248448	-	LOC_Os01g18260.1:exon_9
chr01	10247715	10259011	BreakDancer:Pindel:DELLY:SVseq2:Lumpy	score=99;PE=12:SR=6;score=15:PE=12;SR=0:SR=4:SU=4	exon	10248085	10248270	-	LOC_Os01g18260.1:exon_10
chr01	10247715	10259011	BreakDancer:Pindel:DELLY:SVseq2:Lumpy	score=99;PE=12:SR=6;score=15:PE=12;SR=0:SR=4:SU=4	CDS	10251540	10251783	-	LOC_Os01g18260.1:cds_1
chr01	10247715	10259011	BreakDancer:Pindel:DELLY:SVseq2:Lumpy	score=99;PE=12:SR=6;score=15:PE=12;SR=0:SR=4:SU=4	CDS	10250482	10251461	-	LOC_Os01g18260.1:cds_2
chr01	10247715	10259011	BreakDancer:Pindel:DELLY:SVseq2:Lumpy	score=99;PE=12:SR=6;score=15:PE=12;SR=0:SR=4:SU=4	CDS	10250146	10250287	-	LOC_Os01g18260.1:cds_3
chr01	10247715	10259011	BreakDancer:Pindel:DELLY:SVseq2:Lumpy	score=99;PE=12:SR=6;score=15:PE=12;SR=0:SR=4:SU=4	CDS	10249530	10250096	-	LOC_Os01g18260.1:cds_4
chr01	10247715	10259011	BreakDancer:Pindel:DELLY:SVseq2:Lumpy	score=99;PE=12:SR=6;score=15:PE=12;SR=0:SR=4:SU=4	CDS	10249190	10249466	-	LOC_Os01g18260.1:cds_5
chr01	10247715	10259011	BreakDancer:Pindel:DELLY:SVseq2:Lumpy	score=99;PE=12:SR=6;score=15:PE=12;SR=0:SR=4:SU=4	CDS	10248907	10249080	-	LOC_Os01g18260.1:cds_6
chr01	10247715	10259011	BreakDancer:Pindel:DELLY:SVseq2:Lumpy	score=99;PE=12:SR=6;score=15:PE=12;SR=0:SR=4:SU=4	CDS	10248700	10248810	-	LOC_Os01g18260.1:cds_7
chr01	10247715	10259011	BreakDancer:Pindel:DELLY:SVseq2:Lumpy	score=99;PE=12:SR=6;score=15:PE=12;SR=0:SR=4:SU=4	CDS	10248543	10248615	-	LOC_Os01g18260.1:cds_8
chr01	10247715	10259011	BreakDancer:Pindel:DELLY:SVseq2:Lumpy	score=99;PE=12:SR=6;score=15:PE=12;SR=0:SR=4:SU=4	CDS	10248350	10248448	-	LOC_Os01g18260.1:cds_9
chr01	10247715	10259011	BreakDancer:Pindel:DELLY:SVseq2:Lumpy	score=99;PE=12:SR=6;score=15:PE=12;SR=0:SR=4:SU=4	CDS	10248085	10248270	-	LOC_Os01g18260.1:cds_10
chr01	10247715	10259011	BreakDancer:Pindel:DELLY:SVseq2:Lumpy	score=99;PE=12:SR=6;score=15:PE=12;SR=0:SR=4:SU=4	gene	10254826	10260612	-	LOC_Os01g18270
chr01	10247715	10259011	BreakDancer:Pindel:DELLY:SVseq2:Lumpy	score=99;PE=12:SR=6;score=15:PE=12;SR=0:SR=4:SU=4	mRNA	10254826	10260612	-	LOC_Os01g18270.1
chr01	10247715	10259011	BreakDancer:Pindel:DELLY:SVseq2:Lumpy	score=99;PE=12:SR=6;score=15:PE=12;SR=0:SR=4:SU=4	exon	10257008	10258016	-	LOC_Os01g18270.1:exon_2
chr01	10247715	10259011	BreakDancer:Pindel:DELLY:SVseq2:Lumpy	score=99;PE=12:SR=6;score=15:PE=12;SR=0:SR=4:SU=4	exon	10254826	10256867	-	LOC_Os01g18270.1:exon_3
chr01	10247715	10259011	BreakDancer:Pindel:DELLY:SVseq2:Lumpy	score=99;PE=12:SR=6;score=15:PE=12;SR=0:SR=4:SU=4	CDS	10257008	10258016	-	LOC_Os01g18270.1:cds_2
chr01	10247715	10259011	BreakDancer:Pindel:DELLY:SVseq2:Lumpy	score=99;PE=12:SR=6;score=15:PE=12;SR=0:SR=4:SU=4	CDS	10254826	10256867	-	LOC_Os01g18270.1:cds_3
chr01	10281068	10281275	BreakDancer:Pindel:SVseq2	score=82;PE=5:SR=11;score=30:SR=3	NA	NA	NA	NA	NA
chr01	10380660	10387470	BreakDancer:DELLY	score=99;PE=7:PE=8;SR=0	gene	10380948	10387869	-	LOC_Os01g18470
chr01	10380660	10387470	BreakDancer:DELLY	score=99;PE=7:PE=8;SR=0	mRNA	10380948	10387869	-	LOC_Os01g18470.1
chr01	10380660	10387470	BreakDancer:DELLY	score=99;PE=7:PE=8;SR=0	exon	10386145	10386382	-	LOC_Os01g18470.1:exon_2
chr01	10380660	10387470	BreakDancer:DELLY	score=99;PE=7:PE=8;SR=0	exon	10385401	10385975	-	LOC_Os01g18470.1:exon_3
chr01	10380660	10387470	BreakDancer:DELLY	score=99;PE=7:PE=8;SR=0	exon	10384148	10385343	-	LOC_Os01g18470.1:exon_4
chr01	10380660	10387470	BreakDancer:DELLY	score=99;PE=7:PE=8;SR=0	exon	10383539	10384060	-	LOC_Os01g18470.1:exon_5
chr01	10380660	10387470	BreakDancer:DELLY	score=99;PE=7:PE=8;SR=0	exon	10383322	10383412	-	LOC_Os01g18470.1:exon_6
chr01	10380660	10387470	BreakDancer:DELLY	score=99;PE=7:PE=8;SR=0	exon	10382992	10383230	-	LOC_Os01g18470.1:exon_7
chr01	10380660	10387470	BreakDancer:DELLY	score=99;PE=7:PE=8;SR=0	exon	10382500	10382592	-	LOC_Os01g18470.1:exon_8
chr01	10380660	10387470	BreakDancer:DELLY	score=99;PE=7:PE=8;SR=0	exon	10382298	10382439	-	LOC_Os01g18470.1:exon_9
chr01	10380660	10387470	BreakDancer:DELLY	score=99;PE=7:PE=8;SR=0	exon	10382123	10382221	-	LOC_Os01g18470.1:exon_10
chr01	10380660	10387470	BreakDancer:DELLY	score=99;PE=7:PE=8;SR=0	exon	10381679	10382052	-	LOC_Os01g18470.1:exon_11
chr01	10380660	10387470	BreakDancer:DELLY	score=99;PE=7:PE=8;SR=0	exon	10380948	10381206	-	LOC_Os01g18470.1:exon_12
chr01	10380660	10387470	BreakDancer:DELLY	score=99;PE=7:PE=8;SR=0	CDS	10386145	10386382	-	LOC_Os01g18470.1:cds_2
chr01	10380660	10387470	BreakDancer:DELLY	score=99;PE=7:PE=8;SR=0	CDS	10385401	10385975	-	LOC_Os01g18470.1:cds_3
chr01	10380660	10387470	BreakDancer:DELLY	score=99;PE=7:PE=8;SR=0	CDS	10384148	10385343	-	LOC_Os01g18470.1:cds_4
chr01	10380660	10387470	BreakDancer:DELLY	score=99;PE=7:PE=8;SR=0	CDS	10383539	10384060	-	LOC_Os01g18470.1:cds_5
chr01	10380660	10387470	BreakDancer:DELLY	score=99;PE=7:PE=8;SR=0	CDS	10383322	10383412	-	LOC_Os01g18470.1:cds_6
chr01	10380660	10387470	BreakDancer:DELLY	score=99;PE=7:PE=8;SR=0	CDS	10382992	10383230	-	LOC_Os01g18470.1:cds_7
chr01	10380660	10387470	BreakDancer:DELLY	score=99;PE=7:PE=8;SR=0	CDS	10382500	10382592	-	LOC_Os01g18470.1:cds_8
chr01	10380660	10387470	BreakDancer:DELLY	score=99;PE=7:PE=8;SR=0	CDS	10382298	10382439	-	LOC_Os01g18470.1:cds_9
chr01	10380660	10387470	BreakDancer:DELLY	score=99;PE=7:PE=8;SR=0	CDS	10382123	10382221	-	LOC_Os01g18470.1:cds_10
chr01	10380660	10387470	BreakDancer:DELLY	score=99;PE=7:PE=8;SR=0	CDS	10381679	10382052	-	LOC_Os01g18470.1:cds_11
chr01	10380660	10387470	BreakDancer:DELLY	score=99;PE=7:PE=8;SR=0	CDS	10380948	10381206	-	LOC_Os01g18470.1:cds_12
chr01	10388406	10396480	BreakDancer:Pindel:DELLY:SVseq2:Lumpy	score=99;PE=17:SR=6;score=12:PE=16;SR=0:SR=4:SU=5	gene	10389385	10396284	+	LOC_Os01g18480
chr01	10388406	10396480	BreakDancer:Pindel:DELLY:SVseq2:Lumpy	score=99;PE=17:SR=6;score=12:PE=16;SR=0:SR=4:SU=5	mRNA	10389385	10396284	+	LOC_Os01g18480.1
chr01	10388406	10396480	BreakDancer:Pindel:DELLY:SVseq2:Lumpy	score=99;PE=17:SR=6;score=12:PE=16;SR=0:SR=4:SU=5	exon	10389385	10392013	+	LOC_Os01g18480.1:exon_1
chr01	10388406	10396480	BreakDancer:Pindel:DELLY:SVseq2:Lumpy	score=99;PE=17:SR=6;score=12:PE=16;SR=0:SR=4:SU=5	exon	10392399	10392549	+	LOC_Os01g18480.1:exon_2
chr01	10388406	10396480	BreakDancer:Pindel:DELLY:SVseq2:Lumpy	score=99;PE=17:SR=6;score=12:PE=16;SR=0:SR=4:SU=5	exon	10392622	10392991	+	LOC_Os01g18480.1:exon_3
chr01	10388406	10396480	BreakDancer:Pindel:DELLY:SVseq2:Lumpy	score=99;PE=17:SR=6;score=12:PE=16;SR=0:SR=4:SU=5	exon	10393076	10393486	+	LOC_Os01g18480.1:exon_4
chr01	10388406	10396480	BreakDancer:Pindel:DELLY:SVseq2:Lumpy	score=99;PE=17:SR=6;score=12:PE=16;SR=0:SR=4:SU=5	exon	10393577	10393875	+	LOC_Os01g18480.1:exon_5
chr01	10388406	10396480	BreakDancer:Pindel:DELLY:SVseq2:Lumpy	score=99;PE=17:SR=6;score=12:PE=16;SR=0:SR=4:SU=5	exon	10393952	10394210	+	LOC_Os01g18480.1:exon_6
chr01	10388406	10396480	BreakDancer:Pindel:DELLY:SVseq2:Lumpy	score=99;PE=17:SR=6;score=12:PE=16;SR=0:SR=4:SU=5	exon	10394303	10394552	+	LOC_Os01g18480.1:exon_7
chr01	10388406	10396480	BreakDancer:Pindel:DELLY:SVseq2:Lumpy	score=99;PE=17:SR=6;score=12:PE=16;SR=0:SR=4:SU=5	exon	10394799	10394930	+	LOC_Os01g18480.1:exon_8
chr01	10388406	10396480	BreakDancer:Pindel:DELLY:SVseq2:Lumpy	score=99;PE=17:SR=6;score=12:PE=16;SR=0:SR=4:SU=5	exon	10394991	10395263	+	LOC_Os01g18480.1:exon_9
chr01	10388406	10396480	BreakDancer:Pindel:DELLY:SVseq2:Lumpy	score=99;PE=17:SR=6;score=12:PE=16;SR=0:SR=4:SU=5	exon	10396040	10396284	+	LOC_Os01g18480.1:exon_10
chr01	10388406	10396480	BreakDancer:Pindel:DELLY:SVseq2:Lumpy	score=99;PE=17:SR=6;score=12:PE=16;SR=0:SR=4:SU=5	CDS	10389385	10392013	+	LOC_Os01g18480.1:cds_1
chr01	10388406	10396480	BreakDancer:Pindel:DELLY:SVseq2:Lumpy	score=99;PE=17:SR=6;score=12:PE=16;SR=0:SR=4:SU=5	CDS	10392399	10392549	+	LOC_Os01g18480.1:cds_2
chr01	10388406	10396480	BreakDancer:Pindel:DELLY:SVseq2:Lumpy	score=99;PE=17:SR=6;score=12:PE=16;SR=0:SR=4:SU=5	CDS	10392622	10392991	+	LOC_Os01g18480.1:cds_3
chr01	10388406	10396480	BreakDancer:Pindel:DELLY:SVseq2:Lumpy	score=99;PE=17:SR=6;score=12:PE=16;SR=0:SR=4:SU=5	CDS	10393076	10393486	+	LOC_Os01g18480.1:cds_4
chr01	10388406	10396480	BreakDancer:Pindel:DELLY:SVseq2:Lumpy	score=99;PE=17:SR=6;score=12:PE=16;SR=0:SR=4:SU=5	CDS	10393577	10393875	+	LOC_Os01g18480.1:cds_5
chr01	10388406	10396480	BreakDancer:Pindel:DELLY:SVseq2:Lumpy	score=99;PE=17:SR=6;score=12:PE=16;SR=0:SR=4:SU=5	CDS	10393952	10394210	+	LOC_Os01g18480.1:cds_6
chr01	10388406	10396480	BreakDancer:Pindel:DELLY:SVseq2:Lumpy	score=99;PE=17:SR=6;score=12:PE=16;SR=0:SR=4:SU=5	CDS	10394303	10394552	+	LOC_Os01g18480.1:cds_7
chr01	10388406	10396480	BreakDancer:Pindel:DELLY:SVseq2:Lumpy	score=99;PE=17:SR=6;score=12:PE=16;SR=0:SR=4:SU=5	CDS	10394799	10394930	+	LOC_Os01g18480.1:cds_8
chr01	10388406	10396480	BreakDancer:Pindel:DELLY:SVseq2:Lumpy	score=99;PE=17:SR=6;score=12:PE=16;SR=0:SR=4:SU=5	CDS	10394991	10395263	+	LOC_Os01g18480.1:cds_9
chr01	10388406	10396480	BreakDancer:Pindel:DELLY:SVseq2:Lumpy	score=99;PE=17:SR=6;score=12:PE=16;SR=0:SR=4:SU=5	CDS	10396040	10396284	+	LOC_Os01g18480.1:cds_10
chr01	10430124	10430359	BreakDancer:Pindel	score=99;PE=9:SR=5;score=6	NA	NA	NA	NA	NA
chr01	10463029	10464310	BreakDancer:DELLY:CNVnator:SVseq2:Lumpy	score=99;PE=12:PE=11;SR=7:eval1=383.207;eval2=0.043596;eval3=1;eval4=1:SR=5:SU=5	NA	NA	NA	NA	NA
chr01	10500988	10504738	BreakDancer:Pindel:DELLY:SVseq2	score=99;PE=13:SR=5;score=10:PE=7;SR=0:SR=4	gene	10501619	10504192	-	LOC_Os01g18650
chr01	10500988	10504738	BreakDancer:Pindel:DELLY:SVseq2	score=99;PE=13:SR=5;score=10:PE=7;SR=0:SR=4	mRNA	10501619	10504192	-	LOC_Os01g18650.1
chr01	10500988	10504738	BreakDancer:Pindel:DELLY:SVseq2	score=99;PE=13:SR=5;score=10:PE=7;SR=0:SR=4	exon	10504070	10504192	-	LOC_Os01g18650.1:exon_1
chr01	10500988	10504738	BreakDancer:Pindel:DELLY:SVseq2	score=99;PE=13:SR=5;score=10:PE=7;SR=0:SR=4	exon	10503558	10503855	-	LOC_Os01g18650.1:exon_2
chr01	10500988	10504738	BreakDancer:Pindel:DELLY:SVseq2	score=99;PE=13:SR=5;score=10:PE=7;SR=0:SR=4	exon	10501756	10503521	-	LOC_Os01g18650.1:exon_3
chr01	10500988	10504738	BreakDancer:Pindel:DELLY:SVseq2	score=99;PE=13:SR=5;score=10:PE=7;SR=0:SR=4	exon	10501619	10501684	-	LOC_Os01g18650.1:exon_4
chr01	10500988	10504738	BreakDancer:Pindel:DELLY:SVseq2	score=99;PE=13:SR=5;score=10:PE=7;SR=0:SR=4	CDS	10504070	10504192	-	LOC_Os01g18650.1:cds_1
chr01	10500988	10504738	BreakDancer:Pindel:DELLY:SVseq2	score=99;PE=13:SR=5;score=10:PE=7;SR=0:SR=4	CDS	10503558	10503855	-	LOC_Os01g18650.1:cds_2
chr01	10500988	10504738	BreakDancer:Pindel:DELLY:SVseq2	score=99;PE=13:SR=5;score=10:PE=7;SR=0:SR=4	CDS	10501756	10503521	-	LOC_Os01g18650.1:cds_3
chr01	10500988	10504738	BreakDancer:Pindel:DELLY:SVseq2	score=99;PE=13:SR=5;score=10:PE=7;SR=0:SR=4	CDS	10501619	10501684	-	LOC_Os01g18650.1:cds_4
chr01	10505253	10505407	BreakDancer:Pindel:SVseq2	score=99;PE=11:SR=11;score=36:SR=4	NA	NA	NA	NA	NA
chr01	10569519	10577782	BreakDancer:Pindel:DELLY:Lumpy	score=99;PE=14:SR=9;score=18:PE=12;SR=0:SU=5	gene	10572707	10574221	-	LOC_Os01g18760
chr01	10569519	10577782	BreakDancer:Pindel:DELLY:Lumpy	score=99;PE=14:SR=9;score=18:PE=12;SR=0:SU=5	mRNA	10572707	10574221	-	LOC_Os01g18760.1
chr01	10569519	10577782	BreakDancer:Pindel:DELLY:Lumpy	score=99;PE=14:SR=9;score=18:PE=12;SR=0:SU=5	exon	10572707	10574221	-	LOC_Os01g18760.1:exon_1
chr01	10569519	10577782	BreakDancer:Pindel:DELLY:Lumpy	score=99;PE=14:SR=9;score=18:PE=12;SR=0:SU=5	CDS	10572707	10574221	-	LOC_Os01g18760.1:cds_1
chr01	10569519	10577782	BreakDancer:Pindel:DELLY:Lumpy	score=99;PE=14:SR=9;score=18:PE=12;SR=0:SU=5	gene	10575930	10576529	-	LOC_Os01g18770
chr01	10569519	10577782	BreakDancer:Pindel:DELLY:Lumpy	score=99;PE=14:SR=9;score=18:PE=12;SR=0:SU=5	mRNA	10575930	10576529	-	LOC_Os01g18770.1
chr01	10569519	10577782	BreakDancer:Pindel:DELLY:Lumpy	score=99;PE=14:SR=9;score=18:PE=12;SR=0:SU=5	exon	10575930	10576529	-	LOC_Os01g18770.1:exon_1
chr01	10569519	10577782	BreakDancer:Pindel:DELLY:Lumpy	score=99;PE=14:SR=9;score=18:PE=12;SR=0:SU=5	CDS	10575930	10576529	-	LOC_Os01g18770.1:cds_1
chr01	10602652	10602924	BreakDancer:Pindel:DELLY:SVseq2	score=99;PE=16:SR=8;score=16:PE=0;SR=6:SR=6	NA	NA	NA	NA	NA
chr01	10625725	10627816	BreakDancer:DELLY:Lumpy	score=99;PE=7:PE=12;SR=0:SU=4	gene	10622795	10627552	+	LOC_Os01g18800
chr01	10625725	10627816	BreakDancer:DELLY:Lumpy	score=99;PE=7:PE=12;SR=0:SU=4	mRNA	10622795	10627548	+	LOC_Os01g18800.1
chr01	10625725	10627816	BreakDancer:DELLY:Lumpy	score=99;PE=7:PE=12;SR=0:SU=4	exon	10625704	10625757	+	LOC_Os01g18800.1:exon_6
chr01	10625725	10627816	BreakDancer:DELLY:Lumpy	score=99;PE=7:PE=12;SR=0:SU=4	exon	10625845	10625970	+	LOC_Os01g18800.1:exon_7
chr01	10625725	10627816	BreakDancer:DELLY:Lumpy	score=99;PE=7:PE=12;SR=0:SU=4	exon	10626063	10626269	+	LOC_Os01g18800.1:exon_8
chr01	10625725	10627816	BreakDancer:DELLY:Lumpy	score=99;PE=7:PE=12;SR=0:SU=4	exon	10626381	10626482	+	LOC_Os01g18800.1:exon_9
chr01	10625725	10627816	BreakDancer:DELLY:Lumpy	score=99;PE=7:PE=12;SR=0:SU=4	exon	10626635	10626751	+	LOC_Os01g18800.1:exon_10
chr01	10625725	10627816	BreakDancer:DELLY:Lumpy	score=99;PE=7:PE=12;SR=0:SU=4	exon	10626854	10626925	+	LOC_Os01g18800.1:exon_11
chr01	10625725	10627816	BreakDancer:DELLY:Lumpy	score=99;PE=7:PE=12;SR=0:SU=4	exon	10627020	10627094	+	LOC_Os01g18800.1:exon_12
chr01	10625725	10627816	BreakDancer:DELLY:Lumpy	score=99;PE=7:PE=12;SR=0:SU=4	exon	10627221	10627548	+	LOC_Os01g18800.1:exon_13
chr01	10625725	10627816	BreakDancer:DELLY:Lumpy	score=99;PE=7:PE=12;SR=0:SU=4	CDS	10625704	10625757	+	LOC_Os01g18800.1:cds_6
chr01	10625725	10627816	BreakDancer:DELLY:Lumpy	score=99;PE=7:PE=12;SR=0:SU=4	CDS	10625845	10625970	+	LOC_Os01g18800.1:cds_7
chr01	10625725	10627816	BreakDancer:DELLY:Lumpy	score=99;PE=7:PE=12;SR=0:SU=4	CDS	10626063	10626269	+	LOC_Os01g18800.1:cds_8
chr01	10625725	10627816	BreakDancer:DELLY:Lumpy	score=99;PE=7:PE=12;SR=0:SU=4	CDS	10626381	10626482	+	LOC_Os01g18800.1:cds_9
chr01	10625725	10627816	BreakDancer:DELLY:Lumpy	score=99;PE=7:PE=12;SR=0:SU=4	CDS	10626635	10626751	+	LOC_Os01g18800.1:cds_10
chr01	10625725	10627816	BreakDancer:DELLY:Lumpy	score=99;PE=7:PE=12;SR=0:SU=4	CDS	10626854	10626925	+	LOC_Os01g18800.1:cds_11
chr01	10625725	10627816	BreakDancer:DELLY:Lumpy	score=99;PE=7:PE=12;SR=0:SU=4	CDS	10627020	10627094	+	LOC_Os01g18800.1:cds_12
chr01	10625725	10627816	BreakDancer:DELLY:Lumpy	score=99;PE=7:PE=12;SR=0:SU=4	CDS	10627221	10627340	+	LOC_Os01g18800.1:cds_13
chr01	10625725	10627816	BreakDancer:DELLY:Lumpy	score=99;PE=7:PE=12;SR=0:SU=4	three_prime_UTR	10627341	10627548	+	LOC_Os01g18800.1:utr_2
chr01	10625725	10627816	BreakDancer:DELLY:Lumpy	score=99;PE=7:PE=12;SR=0:SU=4	mRNA	10622795	10627543	+	LOC_Os01g18800.2
chr01	10625725	10627816	BreakDancer:DELLY:Lumpy	score=99;PE=7:PE=12;SR=0:SU=4	exon	10625704	10625757	+	LOC_Os01g18800.2:exon_6
chr01	10625725	10627816	BreakDancer:DELLY:Lumpy	score=99;PE=7:PE=12;SR=0:SU=4	exon	10625845	10625970	+	LOC_Os01g18800.2:exon_7
chr01	10625725	10627816	BreakDancer:DELLY:Lumpy	score=99;PE=7:PE=12;SR=0:SU=4	exon	10626063	10626269	+	LOC_Os01g18800.2:exon_8
chr01	10625725	10627816	BreakDancer:DELLY:Lumpy	score=99;PE=7:PE=12;SR=0:SU=4	exon	10626381	10626482	+	LOC_Os01g18800.2:exon_9
chr01	10625725	10627816	BreakDancer:DELLY:Lumpy	score=99;PE=7:PE=12;SR=0:SU=4	exon	10626635	10626751	+	LOC_Os01g18800.2:exon_10
chr01	10625725	10627816	BreakDancer:DELLY:Lumpy	score=99;PE=7:PE=12;SR=0:SU=4	exon	10626854	10626925	+	LOC_Os01g18800.2:exon_11
chr01	10625725	10627816	BreakDancer:DELLY:Lumpy	score=99;PE=7:PE=12;SR=0:SU=4	exon	10627020	10627543	+	LOC_Os01g18800.2:exon_12
chr01	10625725	10627816	BreakDancer:DELLY:Lumpy	score=99;PE=7:PE=12;SR=0:SU=4	CDS	10625704	10625757	+	LOC_Os01g18800.2:cds_6
chr01	10625725	10627816	BreakDancer:DELLY:Lumpy	score=99;PE=7:PE=12;SR=0:SU=4	CDS	10625845	10625970	+	LOC_Os01g18800.2:cds_7
chr01	10625725	10627816	BreakDancer:DELLY:Lumpy	score=99;PE=7:PE=12;SR=0:SU=4	CDS	10626063	10626269	+	LOC_Os01g18800.2:cds_8
chr01	10625725	10627816	BreakDancer:DELLY:Lumpy	score=99;PE=7:PE=12;SR=0:SU=4	CDS	10626381	10626482	+	LOC_Os01g18800.2:cds_9
chr01	10625725	10627816	BreakDancer:DELLY:Lumpy	score=99;PE=7:PE=12;SR=0:SU=4	CDS	10626635	10626751	+	LOC_Os01g18800.2:cds_10
chr01	10625725	10627816	BreakDancer:DELLY:Lumpy	score=99;PE=7:PE=12;SR=0:SU=4	CDS	10626854	10626925	+	LOC_Os01g18800.2:cds_11
chr01	10625725	10627816	BreakDancer:DELLY:Lumpy	score=99;PE=7:PE=12;SR=0:SU=4	CDS	10627020	10627109	+	LOC_Os01g18800.2:cds_12
chr01	10625725	10627816	BreakDancer:DELLY:Lumpy	score=99;PE=7:PE=12;SR=0:SU=4	three_prime_UTR	10627110	10627543	+	LOC_Os01g18800.2:utr_2
chr01	10625725	10627816	BreakDancer:DELLY:Lumpy	score=99;PE=7:PE=12;SR=0:SU=4	mRNA	10622795	10627552	+	LOC_Os01g18800.3
chr01	10625725	10627816	BreakDancer:DELLY:Lumpy	score=99;PE=7:PE=12;SR=0:SU=4	exon	10625704	10625757	+	LOC_Os01g18800.3:exon_6
chr01	10625725	10627816	BreakDancer:DELLY:Lumpy	score=99;PE=7:PE=12;SR=0:SU=4	exon	10625845	10625970	+	LOC_Os01g18800.3:exon_7
chr01	10625725	10627816	BreakDancer:DELLY:Lumpy	score=99;PE=7:PE=12;SR=0:SU=4	exon	10626063	10626269	+	LOC_Os01g18800.3:exon_8
chr01	10625725	10627816	BreakDancer:DELLY:Lumpy	score=99;PE=7:PE=12;SR=0:SU=4	exon	10626381	10627552	+	LOC_Os01g18800.3:exon_9
chr01	10625725	10627816	BreakDancer:DELLY:Lumpy	score=99;PE=7:PE=12;SR=0:SU=4	CDS	10625704	10625757	+	LOC_Os01g18800.3:cds_6
chr01	10625725	10627816	BreakDancer:DELLY:Lumpy	score=99;PE=7:PE=12;SR=0:SU=4	CDS	10625845	10625970	+	LOC_Os01g18800.3:cds_7
chr01	10625725	10627816	BreakDancer:DELLY:Lumpy	score=99;PE=7:PE=12;SR=0:SU=4	CDS	10626063	10626269	+	LOC_Os01g18800.3:cds_8
chr01	10625725	10627816	BreakDancer:DELLY:Lumpy	score=99;PE=7:PE=12;SR=0:SU=4	CDS	10626381	10626602	+	LOC_Os01g18800.3:cds_9
chr01	10625725	10627816	BreakDancer:DELLY:Lumpy	score=99;PE=7:PE=12;SR=0:SU=4	three_prime_UTR	10626603	10627552	+	LOC_Os01g18800.3:utr_2
chr01	10625725	10627816	BreakDancer:DELLY:Lumpy	score=99;PE=7:PE=12;SR=0:SU=4	mRNA	10622808	10627548	+	LOC_Os01g18800.4
chr01	10625725	10627816	BreakDancer:DELLY:Lumpy	score=99;PE=7:PE=12;SR=0:SU=4	exon	10625704	10625757	+	LOC_Os01g18800.4:exon_5
chr01	10625725	10627816	BreakDancer:DELLY:Lumpy	score=99;PE=7:PE=12;SR=0:SU=4	exon	10625845	10625970	+	LOC_Os01g18800.4:exon_6
chr01	10625725	10627816	BreakDancer:DELLY:Lumpy	score=99;PE=7:PE=12;SR=0:SU=4	exon	10626063	10626269	+	LOC_Os01g18800.4:exon_7
chr01	10625725	10627816	BreakDancer:DELLY:Lumpy	score=99;PE=7:PE=12;SR=0:SU=4	exon	10626381	10626482	+	LOC_Os01g18800.4:exon_8
chr01	10625725	10627816	BreakDancer:DELLY:Lumpy	score=99;PE=7:PE=12;SR=0:SU=4	exon	10626635	10626751	+	LOC_Os01g18800.4:exon_9
chr01	10625725	10627816	BreakDancer:DELLY:Lumpy	score=99;PE=7:PE=12;SR=0:SU=4	exon	10626854	10626925	+	LOC_Os01g18800.4:exon_10
chr01	10625725	10627816	BreakDancer:DELLY:Lumpy	score=99;PE=7:PE=12;SR=0:SU=4	exon	10627020	10627094	+	LOC_Os01g18800.4:exon_11
chr01	10625725	10627816	BreakDancer:DELLY:Lumpy	score=99;PE=7:PE=12;SR=0:SU=4	exon	10627221	10627548	+	LOC_Os01g18800.4:exon_12
chr01	10625725	10627816	BreakDancer:DELLY:Lumpy	score=99;PE=7:PE=12;SR=0:SU=4	CDS	10625704	10625757	+	LOC_Os01g18800.4:cds_4
chr01	10625725	10627816	BreakDancer:DELLY:Lumpy	score=99;PE=7:PE=12;SR=0:SU=4	CDS	10625845	10625970	+	LOC_Os01g18800.4:cds_5
chr01	10625725	10627816	BreakDancer:DELLY:Lumpy	score=99;PE=7:PE=12;SR=0:SU=4	CDS	10626063	10626269	+	LOC_Os01g18800.4:cds_6
chr01	10625725	10627816	BreakDancer:DELLY:Lumpy	score=99;PE=7:PE=12;SR=0:SU=4	CDS	10626381	10626482	+	LOC_Os01g18800.4:cds_7
chr01	10625725	10627816	BreakDancer:DELLY:Lumpy	score=99;PE=7:PE=12;SR=0:SU=4	CDS	10626635	10626751	+	LOC_Os01g18800.4:cds_8
chr01	10625725	10627816	BreakDancer:DELLY:Lumpy	score=99;PE=7:PE=12;SR=0:SU=4	CDS	10626854	10626925	+	LOC_Os01g18800.4:cds_9
chr01	10625725	10627816	BreakDancer:DELLY:Lumpy	score=99;PE=7:PE=12;SR=0:SU=4	CDS	10627020	10627094	+	LOC_Os01g18800.4:cds_10
chr01	10625725	10627816	BreakDancer:DELLY:Lumpy	score=99;PE=7:PE=12;SR=0:SU=4	CDS	10627221	10627340	+	LOC_Os01g18800.4:cds_11
chr01	10625725	10627816	BreakDancer:DELLY:Lumpy	score=99;PE=7:PE=12;SR=0:SU=4	three_prime_UTR	10627341	10627548	+	LOC_Os01g18800.4:utr_3
chr01	10625725	10627816	BreakDancer:DELLY:Lumpy	score=99;PE=7:PE=12;SR=0:SU=4	mRNA	10622808	10625837	+	LOC_Os01g18800.5
chr01	10625725	10627816	BreakDancer:DELLY:Lumpy	score=99;PE=7:PE=12;SR=0:SU=4	exon	10625539	10625837	+	LOC_Os01g18800.5:exon_5
chr01	10625725	10627816	BreakDancer:DELLY:Lumpy	score=99;PE=7:PE=12;SR=0:SU=4	three_prime_UTR	10625626	10625837	+	LOC_Os01g18800.5:utr_2
chr01	10698524	10700884	BreakDancer:DELLY	score=72;PE=3:PE=4;SR=0	NA	NA	NA	NA	NA
chr01	10809070	10809317	BreakDancer:Pindel:DELLY:SVseq2	score=99;PE=9:SR=7;score=20:PE=0;SR=5:SR=4	NA	NA	NA	NA	NA
chr01	10810792	10811666	BreakDancer:DELLY	score=99;PE=11:PE=11;SR=0	NA	NA	NA	NA	NA
chr01	10851836	10867990	BreakDancer:Pindel:DELLY:Lumpy	score=99;PE=17:SR=8;score=25:PE=16;SR=7:SU=7	gene	10853801	10859425	+	LOC_Os01g19190
chr01	10851836	10867990	BreakDancer:Pindel:DELLY:Lumpy	score=99;PE=17:SR=8;score=25:PE=16;SR=7:SU=7	mRNA	10853801	10859425	+	LOC_Os01g19190.1
chr01	10851836	10867990	BreakDancer:Pindel:DELLY:Lumpy	score=99;PE=17:SR=8;score=25:PE=16;SR=7:SU=7	exon	10853801	10855816	+	LOC_Os01g19190.1:exon_1
chr01	10851836	10867990	BreakDancer:Pindel:DELLY:Lumpy	score=99;PE=17:SR=8;score=25:PE=16;SR=7:SU=7	exon	10855889	10859425	+	LOC_Os01g19190.1:exon_2
chr01	10851836	10867990	BreakDancer:Pindel:DELLY:Lumpy	score=99;PE=17:SR=8;score=25:PE=16;SR=7:SU=7	CDS	10853801	10855816	+	LOC_Os01g19190.1:cds_1
chr01	10851836	10867990	BreakDancer:Pindel:DELLY:Lumpy	score=99;PE=17:SR=8;score=25:PE=16;SR=7:SU=7	CDS	10855889	10859425	+	LOC_Os01g19190.1:cds_2
chr01	10851836	10867990	BreakDancer:Pindel:DELLY:Lumpy	score=99;PE=17:SR=8;score=25:PE=16;SR=7:SU=7	gene	10860048	10863321	-	LOC_Os01g19200
chr01	10851836	10867990	BreakDancer:Pindel:DELLY:Lumpy	score=99;PE=17:SR=8;score=25:PE=16;SR=7:SU=7	mRNA	10860048	10863321	-	LOC_Os01g19200.1
chr01	10851836	10867990	BreakDancer:Pindel:DELLY:Lumpy	score=99;PE=17:SR=8;score=25:PE=16;SR=7:SU=7	exon	10862062	10863321	-	LOC_Os01g19200.1:exon_1
chr01	10851836	10867990	BreakDancer:Pindel:DELLY:Lumpy	score=99;PE=17:SR=8;score=25:PE=16;SR=7:SU=7	exon	10861290	10861931	-	LOC_Os01g19200.1:exon_2
chr01	10851836	10867990	BreakDancer:Pindel:DELLY:Lumpy	score=99;PE=17:SR=8;score=25:PE=16;SR=7:SU=7	exon	10860424	10861230	-	LOC_Os01g19200.1:exon_3
chr01	10851836	10867990	BreakDancer:Pindel:DELLY:Lumpy	score=99;PE=17:SR=8;score=25:PE=16;SR=7:SU=7	exon	10860048	10860392	-	LOC_Os01g19200.1:exon_4
chr01	10851836	10867990	BreakDancer:Pindel:DELLY:Lumpy	score=99;PE=17:SR=8;score=25:PE=16;SR=7:SU=7	CDS	10862062	10863321	-	LOC_Os01g19200.1:cds_1
chr01	10851836	10867990	BreakDancer:Pindel:DELLY:Lumpy	score=99;PE=17:SR=8;score=25:PE=16;SR=7:SU=7	CDS	10861290	10861931	-	LOC_Os01g19200.1:cds_2
chr01	10851836	10867990	BreakDancer:Pindel:DELLY:Lumpy	score=99;PE=17:SR=8;score=25:PE=16;SR=7:SU=7	CDS	10860424	10861230	-	LOC_Os01g19200.1:cds_3
chr01	10851836	10867990	BreakDancer:Pindel:DELLY:Lumpy	score=99;PE=17:SR=8;score=25:PE=16;SR=7:SU=7	CDS	10860048	10860392	-	LOC_Os01g19200.1:cds_4
chr01	10851836	10867990	BreakDancer:Pindel:DELLY:Lumpy	score=99;PE=17:SR=8;score=25:PE=16;SR=7:SU=7	gene	10864260	10867334	-	LOC_Os01g19210
chr01	10851836	10867990	BreakDancer:Pindel:DELLY:Lumpy	score=99;PE=17:SR=8;score=25:PE=16;SR=7:SU=7	mRNA	10864260	10867334	-	LOC_Os01g19210.1
chr01	10851836	10867990	BreakDancer:Pindel:DELLY:Lumpy	score=99;PE=17:SR=8;score=25:PE=16;SR=7:SU=7	exon	10867295	10867334	-	LOC_Os01g19210.1:exon_1
chr01	10851836	10867990	BreakDancer:Pindel:DELLY:Lumpy	score=99;PE=17:SR=8;score=25:PE=16;SR=7:SU=7	exon	10865207	10867258	-	LOC_Os01g19210.1:exon_2
chr01	10851836	10867990	BreakDancer:Pindel:DELLY:Lumpy	score=99;PE=17:SR=8;score=25:PE=16;SR=7:SU=7	exon	10865029	10865105	-	LOC_Os01g19210.1:exon_3
chr01	10851836	10867990	BreakDancer:Pindel:DELLY:Lumpy	score=99;PE=17:SR=8;score=25:PE=16;SR=7:SU=7	exon	10864260	10864571	-	LOC_Os01g19210.1:exon_4
chr01	10851836	10867990	BreakDancer:Pindel:DELLY:Lumpy	score=99;PE=17:SR=8;score=25:PE=16;SR=7:SU=7	CDS	10867295	10867334	-	LOC_Os01g19210.1:cds_1
chr01	10851836	10867990	BreakDancer:Pindel:DELLY:Lumpy	score=99;PE=17:SR=8;score=25:PE=16;SR=7:SU=7	CDS	10865207	10867258	-	LOC_Os01g19210.1:cds_2
chr01	10851836	10867990	BreakDancer:Pindel:DELLY:Lumpy	score=99;PE=17:SR=8;score=25:PE=16;SR=7:SU=7	CDS	10865029	10865105	-	LOC_Os01g19210.1:cds_3
chr01	10851836	10867990	BreakDancer:Pindel:DELLY:Lumpy	score=99;PE=17:SR=8;score=25:PE=16;SR=7:SU=7	CDS	10864260	10864571	-	LOC_Os01g19210.1:cds_4
chr01	10882363	10887030	BreakDancer:Pindel:DELLY:SVseq2:Lumpy	score=99;PE=16:SR=11;score=30:PE=18;SR=4:SR=3:SU=5	gene	10885891	10886205	+	LOC_Os01g19250
chr01	10882363	10887030	BreakDancer:Pindel:DELLY:SVseq2:Lumpy	score=99;PE=16:SR=11;score=30:PE=18;SR=4:SR=3:SU=5	mRNA	10885891	10886205	+	LOC_Os01g19250.1
chr01	10882363	10887030	BreakDancer:Pindel:DELLY:SVseq2:Lumpy	score=99;PE=16:SR=11;score=30:PE=18;SR=4:SR=3:SU=5	exon	10885891	10886205	+	LOC_Os01g19250.1:exon_1
chr01	10882363	10887030	BreakDancer:Pindel:DELLY:SVseq2:Lumpy	score=99;PE=16:SR=11;score=30:PE=18;SR=4:SR=3:SU=5	CDS	10885891	10886205	+	LOC_Os01g19250.1:cds_1
chr01	10893907	10894955	BreakDancer:Pindel:DELLY:Lumpy	score=99;PE=14:SR=3;score=6:PE=14;SR=0:SU=5	NA	NA	NA	NA	NA
chr01	10926332	10927629	BreakDancer:DELLY:SVseq2:Lumpy	score=99;PE=16:PE=14;SR=6:SR=4:SU=4	gene	10925899	10928720	-	LOC_Os01g19310
chr01	10926332	10927629	BreakDancer:DELLY:SVseq2:Lumpy	score=99;PE=16:PE=14;SR=6:SR=4:SU=4	exon	10926738	10927666	-	LOC_Os01g19310.1:exon_2
chr01	10926332	10927629	BreakDancer:DELLY:SVseq2:Lumpy	score=99;PE=16:PE=14;SR=6:SR=4:SU=4	mRNA	10925899	10928720	-	LOC_Os01g19310.1
chr01	10926332	10927629	BreakDancer:DELLY:SVseq2:Lumpy	score=99;PE=16:PE=14;SR=6:SR=4:SU=4	CDS	10926738	10927666	-	LOC_Os01g19310.1:cds_2
chr01	10928044	10929126	BreakDancer:DELLY	score=99;PE=10:PE=10;SR=0	exon	10928345	10928720	-	LOC_Os01g19310.1:exon_1
chr01	10928044	10929126	BreakDancer:DELLY	score=99;PE=10:PE=10;SR=0	gene	10925899	10928720	-	LOC_Os01g19310
chr01	10928044	10929126	BreakDancer:DELLY	score=99;PE=10:PE=10;SR=0	CDS	10928345	10928720	-	LOC_Os01g19310.1:cds_1
chr01	10928044	10929126	BreakDancer:DELLY	score=99;PE=10:PE=10;SR=0	mRNA	10925899	10928720	-	LOC_Os01g19310.1
chr01	10937400	10937616	BreakDancer:Pindel	score=99;PE=19:SR=5;score=10	NA	NA	NA	NA	NA
chr01	10974358	10975756	BreakDancer:DELLY:CNVnator:Lumpy	score=99;PE=23:PE=22;SR=0:eval1=87.6034;eval2=1.94237e-05;eval3=1;eval4=1:SU=7	NA	NA	NA	NA	NA
chr01	11072786	11074860	BreakDancer:DELLY	score=99;PE=6:PE=9;SR=0	NA	NA	NA	NA	NA
chr01	11082586	11082954	BreakDancer:Pindel:DELLY:SVseq2	score=99;PE=18:SR=9;score=18:PE=19;SR=5:SR=6	gene	11078199	11083482	-	LOC_Os01g19529
chr01	11082586	11082954	BreakDancer:Pindel:DELLY:SVseq2	score=99;PE=18:SR=9;score=18:PE=19;SR=5:SR=6	mRNA	11078199	11083482	-	LOC_Os01g19529.1
chr01	11196283	11197109	BreakDancer:DELLY:Lumpy	score=94;PE=4:PE=13;SR=0:SU=5	NA	NA	NA	NA	NA
chr01	11207551	11208544	BreakDancer:Pindel:DELLY:Lumpy	score=99;PE=13:SR=6;score=15:PE=11;SR=0:SU=5	NA	NA	NA	NA	NA
chr01	11292020	11299706	BreakDancer:Pindel:DELLY	score=99;PE=7:SR=3;score=6:PE=7;SR=0	gene	11292665	11305805	-	LOC_Os01g19894
chr01	11292020	11299706	BreakDancer:Pindel:DELLY	score=99;PE=7:SR=3;score=6:PE=7;SR=0	mRNA	11292665	11305805	-	LOC_Os01g19894.1
chr01	11292020	11299706	BreakDancer:Pindel:DELLY	score=99;PE=7:SR=3;score=6:PE=7;SR=0	exon	11297004	11298780	-	LOC_Os01g19894.1:exon_7
chr01	11292020	11299706	BreakDancer:Pindel:DELLY	score=99;PE=7:SR=3;score=6:PE=7;SR=0	exon	11296165	11296768	-	LOC_Os01g19894.1:exon_8
chr01	11292020	11299706	BreakDancer:Pindel:DELLY	score=99;PE=7:SR=3;score=6:PE=7;SR=0	exon	11295461	11295533	-	LOC_Os01g19894.1:exon_9
chr01	11292020	11299706	BreakDancer:Pindel:DELLY	score=99;PE=7:SR=3;score=6:PE=7;SR=0	exon	11294610	11295378	-	LOC_Os01g19894.1:exon_10
chr01	11292020	11299706	BreakDancer:Pindel:DELLY	score=99;PE=7:SR=3;score=6:PE=7;SR=0	exon	11294219	11294517	-	LOC_Os01g19894.1:exon_11
chr01	11292020	11299706	BreakDancer:Pindel:DELLY	score=99;PE=7:SR=3;score=6:PE=7;SR=0	exon	11294063	11294126	-	LOC_Os01g19894.1:exon_12
chr01	11292020	11299706	BreakDancer:Pindel:DELLY	score=99;PE=7:SR=3;score=6:PE=7;SR=0	exon	11293528	11293604	-	LOC_Os01g19894.1:exon_13
chr01	11292020	11299706	BreakDancer:Pindel:DELLY	score=99;PE=7:SR=3;score=6:PE=7;SR=0	exon	11293227	11293441	-	LOC_Os01g19894.1:exon_14
chr01	11292020	11299706	BreakDancer:Pindel:DELLY	score=99;PE=7:SR=3;score=6:PE=7;SR=0	exon	11292665	11292972	-	LOC_Os01g19894.1:exon_15
chr01	11292020	11299706	BreakDancer:Pindel:DELLY	score=99;PE=7:SR=3;score=6:PE=7;SR=0	CDS	11297004	11298780	-	LOC_Os01g19894.1:cds_7
chr01	11292020	11299706	BreakDancer:Pindel:DELLY	score=99;PE=7:SR=3;score=6:PE=7;SR=0	CDS	11296165	11296768	-	LOC_Os01g19894.1:cds_8
chr01	11292020	11299706	BreakDancer:Pindel:DELLY	score=99;PE=7:SR=3;score=6:PE=7;SR=0	CDS	11295461	11295533	-	LOC_Os01g19894.1:cds_9
chr01	11292020	11299706	BreakDancer:Pindel:DELLY	score=99;PE=7:SR=3;score=6:PE=7;SR=0	CDS	11294610	11295378	-	LOC_Os01g19894.1:cds_10
chr01	11292020	11299706	BreakDancer:Pindel:DELLY	score=99;PE=7:SR=3;score=6:PE=7;SR=0	CDS	11294219	11294517	-	LOC_Os01g19894.1:cds_11
chr01	11292020	11299706	BreakDancer:Pindel:DELLY	score=99;PE=7:SR=3;score=6:PE=7;SR=0	CDS	11294063	11294126	-	LOC_Os01g19894.1:cds_12
chr01	11292020	11299706	BreakDancer:Pindel:DELLY	score=99;PE=7:SR=3;score=6:PE=7;SR=0	CDS	11293528	11293604	-	LOC_Os01g19894.1:cds_13
chr01	11292020	11299706	BreakDancer:Pindel:DELLY	score=99;PE=7:SR=3;score=6:PE=7;SR=0	CDS	11293227	11293441	-	LOC_Os01g19894.1:cds_14
chr01	11292020	11299706	BreakDancer:Pindel:DELLY	score=99;PE=7:SR=3;score=6:PE=7;SR=0	CDS	11292665	11292972	-	LOC_Os01g19894.1:cds_15
chr01	11348619	11350048	BreakDancer:Pindel:DELLY:Lumpy	score=99;PE=23:SR=8;score=25:PE=24;SR=0:SU=5	NA	NA	NA	NA	NA
chr01	11439643	11450559	BreakDancer:Pindel:DELLY:SVseq2:Lumpy	score=99;PE=17:SR=3;score=6:PE=17;SR=4:SR=3:SU=5	gene	11440244	11443534	+	LOC_Os01g20130
chr01	11439643	11450559	BreakDancer:Pindel:DELLY:SVseq2:Lumpy	score=99;PE=17:SR=3;score=6:PE=17;SR=4:SR=3:SU=5	mRNA	11440244	11443534	+	LOC_Os01g20130.1
chr01	11439643	11450559	BreakDancer:Pindel:DELLY:SVseq2:Lumpy	score=99;PE=17:SR=3;score=6:PE=17;SR=4:SR=3:SU=5	exon	11440244	11442202	+	LOC_Os01g20130.1:exon_1
chr01	11439643	11450559	BreakDancer:Pindel:DELLY:SVseq2:Lumpy	score=99;PE=17:SR=3;score=6:PE=17;SR=4:SR=3:SU=5	exon	11442305	11443534	+	LOC_Os01g20130.1:exon_2
chr01	11439643	11450559	BreakDancer:Pindel:DELLY:SVseq2:Lumpy	score=99;PE=17:SR=3;score=6:PE=17;SR=4:SR=3:SU=5	five_prime_UTR	11440244	11440246	+	LOC_Os01g20130.1:utr_1
chr01	11439643	11450559	BreakDancer:Pindel:DELLY:SVseq2:Lumpy	score=99;PE=17:SR=3;score=6:PE=17;SR=4:SR=3:SU=5	CDS	11440247	11442202	+	LOC_Os01g20130.1:cds_1
chr01	11439643	11450559	BreakDancer:Pindel:DELLY:SVseq2:Lumpy	score=99;PE=17:SR=3;score=6:PE=17;SR=4:SR=3:SU=5	CDS	11442305	11443534	+	LOC_Os01g20130.1:cds_2
chr01	11439643	11450559	BreakDancer:Pindel:DELLY:SVseq2:Lumpy	score=99;PE=17:SR=3;score=6:PE=17;SR=4:SR=3:SU=5	gene	11444192	11444686	-	LOC_Os01g20140
chr01	11439643	11450559	BreakDancer:Pindel:DELLY:SVseq2:Lumpy	score=99;PE=17:SR=3;score=6:PE=17;SR=4:SR=3:SU=5	mRNA	11444192	11444686	-	LOC_Os01g20140.1
chr01	11439643	11450559	BreakDancer:Pindel:DELLY:SVseq2:Lumpy	score=99;PE=17:SR=3;score=6:PE=17;SR=4:SR=3:SU=5	exon	11444192	11444686	-	LOC_Os01g20140.1:exon_1
chr01	11439643	11450559	BreakDancer:Pindel:DELLY:SVseq2:Lumpy	score=99;PE=17:SR=3;score=6:PE=17;SR=4:SR=3:SU=5	CDS	11444192	11444686	-	LOC_Os01g20140.1:cds_1
chr01	11439643	11450559	BreakDancer:Pindel:DELLY:SVseq2:Lumpy	score=99;PE=17:SR=3;score=6:PE=17;SR=4:SR=3:SU=5	gene	11446404	11449442	+	LOC_Os01g20150
chr01	11439643	11450559	BreakDancer:Pindel:DELLY:SVseq2:Lumpy	score=99;PE=17:SR=3;score=6:PE=17;SR=4:SR=3:SU=5	mRNA	11446404	11449442	+	LOC_Os01g20150.1
chr01	11439643	11450559	BreakDancer:Pindel:DELLY:SVseq2:Lumpy	score=99;PE=17:SR=3;score=6:PE=17;SR=4:SR=3:SU=5	exon	11446404	11446533	+	LOC_Os01g20150.1:exon_1
chr01	11439643	11450559	BreakDancer:Pindel:DELLY:SVseq2:Lumpy	score=99;PE=17:SR=3;score=6:PE=17;SR=4:SR=3:SU=5	exon	11446622	11447055	+	LOC_Os01g20150.1:exon_2
chr01	11439643	11450559	BreakDancer:Pindel:DELLY:SVseq2:Lumpy	score=99;PE=17:SR=3;score=6:PE=17;SR=4:SR=3:SU=5	exon	11447134	11447355	+	LOC_Os01g20150.1:exon_3
chr01	11439643	11450559	BreakDancer:Pindel:DELLY:SVseq2:Lumpy	score=99;PE=17:SR=3;score=6:PE=17;SR=4:SR=3:SU=5	exon	11447434	11447895	+	LOC_Os01g20150.1:exon_4
chr01	11439643	11450559	BreakDancer:Pindel:DELLY:SVseq2:Lumpy	score=99;PE=17:SR=3;score=6:PE=17;SR=4:SR=3:SU=5	exon	11447977	11448809	+	LOC_Os01g20150.1:exon_5
chr01	11439643	11450559	BreakDancer:Pindel:DELLY:SVseq2:Lumpy	score=99;PE=17:SR=3;score=6:PE=17;SR=4:SR=3:SU=5	exon	11448892	11449062	+	LOC_Os01g20150.1:exon_6
chr01	11439643	11450559	BreakDancer:Pindel:DELLY:SVseq2:Lumpy	score=99;PE=17:SR=3;score=6:PE=17;SR=4:SR=3:SU=5	exon	11449142	11449442	+	LOC_Os01g20150.1:exon_7
chr01	11439643	11450559	BreakDancer:Pindel:DELLY:SVseq2:Lumpy	score=99;PE=17:SR=3;score=6:PE=17;SR=4:SR=3:SU=5	CDS	11446404	11446533	+	LOC_Os01g20150.1:cds_1
chr01	11439643	11450559	BreakDancer:Pindel:DELLY:SVseq2:Lumpy	score=99;PE=17:SR=3;score=6:PE=17;SR=4:SR=3:SU=5	CDS	11446622	11447055	+	LOC_Os01g20150.1:cds_2
chr01	11439643	11450559	BreakDancer:Pindel:DELLY:SVseq2:Lumpy	score=99;PE=17:SR=3;score=6:PE=17;SR=4:SR=3:SU=5	CDS	11447134	11447355	+	LOC_Os01g20150.1:cds_3
chr01	11439643	11450559	BreakDancer:Pindel:DELLY:SVseq2:Lumpy	score=99;PE=17:SR=3;score=6:PE=17;SR=4:SR=3:SU=5	CDS	11447434	11447895	+	LOC_Os01g20150.1:cds_4
chr01	11439643	11450559	BreakDancer:Pindel:DELLY:SVseq2:Lumpy	score=99;PE=17:SR=3;score=6:PE=17;SR=4:SR=3:SU=5	CDS	11447977	11448809	+	LOC_Os01g20150.1:cds_5
chr01	11439643	11450559	BreakDancer:Pindel:DELLY:SVseq2:Lumpy	score=99;PE=17:SR=3;score=6:PE=17;SR=4:SR=3:SU=5	CDS	11448892	11449062	+	LOC_Os01g20150.1:cds_6
chr01	11439643	11450559	BreakDancer:Pindel:DELLY:SVseq2:Lumpy	score=99;PE=17:SR=3;score=6:PE=17;SR=4:SR=3:SU=5	CDS	11449142	11449442	+	LOC_Os01g20150.1:cds_7
chr01	11532367	11532840	BreakDancer:DELLY:SVseq2	score=99;PE=6:PE=6;SR=0:SR=3	NA	NA	NA	NA	NA
chr01	11561431	11569702	BreakDancer:DELLY	score=99;PE=5:PE=5;SR=0	gene	11562530	11568879	+	LOC_Os01g20760
chr01	11561431	11569702	BreakDancer:DELLY	score=99;PE=5:PE=5;SR=0	mRNA	11562530	11568879	+	LOC_Os01g20760.1
chr01	11561431	11569702	BreakDancer:DELLY	score=99;PE=5:PE=5;SR=0	exon	11562530	11563064	+	LOC_Os01g20760.1:exon_1
chr01	11561431	11569702	BreakDancer:DELLY	score=99;PE=5:PE=5;SR=0	exon	11563524	11564876	+	LOC_Os01g20760.1:exon_2
chr01	11561431	11569702	BreakDancer:DELLY	score=99;PE=5:PE=5;SR=0	exon	11565315	11565378	+	LOC_Os01g20760.1:exon_3
chr01	11561431	11569702	BreakDancer:DELLY	score=99;PE=5:PE=5;SR=0	exon	11565538	11565907	+	LOC_Os01g20760.1:exon_4
chr01	11561431	11569702	BreakDancer:DELLY	score=99;PE=5:PE=5;SR=0	exon	11565992	11566402	+	LOC_Os01g20760.1:exon_5
chr01	11561431	11569702	BreakDancer:DELLY	score=99;PE=5:PE=5;SR=0	exon	11566494	11566598	+	LOC_Os01g20760.1:exon_6
chr01	11561431	11569702	BreakDancer:DELLY	score=99;PE=5:PE=5;SR=0	exon	11566714	11566790	+	LOC_Os01g20760.1:exon_7
chr01	11561431	11569702	BreakDancer:DELLY	score=99;PE=5:PE=5;SR=0	exon	11566867	11567125	+	LOC_Os01g20760.1:exon_8
chr01	11561431	11569702	BreakDancer:DELLY	score=99;PE=5:PE=5;SR=0	exon	11567218	11567467	+	LOC_Os01g20760.1:exon_9
chr01	11561431	11569702	BreakDancer:DELLY	score=99;PE=5:PE=5;SR=0	exon	11567714	11567845	+	LOC_Os01g20760.1:exon_10
chr01	11561431	11569702	BreakDancer:DELLY	score=99;PE=5:PE=5;SR=0	exon	11567906	11568078	+	LOC_Os01g20760.1:exon_11
chr01	11561431	11569702	BreakDancer:DELLY	score=99;PE=5:PE=5;SR=0	exon	11568721	11568879	+	LOC_Os01g20760.1:exon_12
chr01	11561431	11569702	BreakDancer:DELLY	score=99;PE=5:PE=5;SR=0	CDS	11562530	11563064	+	LOC_Os01g20760.1:cds_1
chr01	11561431	11569702	BreakDancer:DELLY	score=99;PE=5:PE=5;SR=0	CDS	11563524	11564876	+	LOC_Os01g20760.1:cds_2
chr01	11561431	11569702	BreakDancer:DELLY	score=99;PE=5:PE=5;SR=0	CDS	11565315	11565378	+	LOC_Os01g20760.1:cds_3
chr01	11561431	11569702	BreakDancer:DELLY	score=99;PE=5:PE=5;SR=0	CDS	11565538	11565907	+	LOC_Os01g20760.1:cds_4
chr01	11561431	11569702	BreakDancer:DELLY	score=99;PE=5:PE=5;SR=0	CDS	11565992	11566402	+	LOC_Os01g20760.1:cds_5
chr01	11561431	11569702	BreakDancer:DELLY	score=99;PE=5:PE=5;SR=0	CDS	11566494	11566598	+	LOC_Os01g20760.1:cds_6
chr01	11561431	11569702	BreakDancer:DELLY	score=99;PE=5:PE=5;SR=0	CDS	11566714	11566790	+	LOC_Os01g20760.1:cds_7
chr01	11561431	11569702	BreakDancer:DELLY	score=99;PE=5:PE=5;SR=0	CDS	11566867	11567125	+	LOC_Os01g20760.1:cds_8
chr01	11561431	11569702	BreakDancer:DELLY	score=99;PE=5:PE=5;SR=0	CDS	11567218	11567467	+	LOC_Os01g20760.1:cds_9
chr01	11561431	11569702	BreakDancer:DELLY	score=99;PE=5:PE=5;SR=0	CDS	11567714	11567845	+	LOC_Os01g20760.1:cds_10
chr01	11561431	11569702	BreakDancer:DELLY	score=99;PE=5:PE=5;SR=0	CDS	11567906	11568078	+	LOC_Os01g20760.1:cds_11
chr01	11561431	11569702	BreakDancer:DELLY	score=99;PE=5:PE=5;SR=0	CDS	11568721	11568879	+	LOC_Os01g20760.1:cds_12
chr01	11578114	11578424	BreakDancer:DELLY	score=99;PE=14:PE=14;SR=0	NA	NA	NA	NA	NA
chr01	11682398	11683396	BreakDancer:DELLY	score=61;PE=3:PE=3;SR=0	gene	11677483	11685307	+	LOC_Os01g20900
chr01	11682398	11683396	BreakDancer:DELLY	score=61;PE=3:PE=3;SR=0	mRNA	11677483	11685307	+	LOC_Os01g20900.5
chr01	11693276	11693522	BreakDancer:Pindel	score=99;PE=21:SR=4;score=8	NA	NA	NA	NA	NA
chr01	11761022	11764946	BreakDancer:Pindel:DELLY:Lumpy	score=99;PE=7:SR=4;score=5:PE=11;SR=0:SU=4	gene	11761405	11762013	+	LOC_Os01g21080
chr01	11761022	11764946	BreakDancer:Pindel:DELLY:Lumpy	score=99;PE=7:SR=4;score=5:PE=11;SR=0:SU=4	mRNA	11761405	11762013	+	LOC_Os01g21080.1
chr01	11761022	11764946	BreakDancer:Pindel:DELLY:Lumpy	score=99;PE=7:SR=4;score=5:PE=11;SR=0:SU=4	exon	11761405	11762013	+	LOC_Os01g21080.1:exon_1
chr01	11761022	11764946	BreakDancer:Pindel:DELLY:Lumpy	score=99;PE=7:SR=4;score=5:PE=11;SR=0:SU=4	CDS	11761405	11762013	+	LOC_Os01g21080.1:cds_1
chr01	11761022	11764946	BreakDancer:Pindel:DELLY:Lumpy	score=99;PE=7:SR=4;score=5:PE=11;SR=0:SU=4	gene	11762633	11764595	-	LOC_Os01g21090
chr01	11761022	11764946	BreakDancer:Pindel:DELLY:Lumpy	score=99;PE=7:SR=4;score=5:PE=11;SR=0:SU=4	mRNA	11762633	11764595	-	LOC_Os01g21090.1
chr01	11761022	11764946	BreakDancer:Pindel:DELLY:Lumpy	score=99;PE=7:SR=4;score=5:PE=11;SR=0:SU=4	exon	11764298	11764595	-	LOC_Os01g21090.1:exon_1
chr01	11761022	11764946	BreakDancer:Pindel:DELLY:Lumpy	score=99;PE=7:SR=4;score=5:PE=11;SR=0:SU=4	exon	11762633	11764131	-	LOC_Os01g21090.1:exon_2
chr01	11761022	11764946	BreakDancer:Pindel:DELLY:Lumpy	score=99;PE=7:SR=4;score=5:PE=11;SR=0:SU=4	CDS	11764298	11764595	-	LOC_Os01g21090.1:cds_1
chr01	11761022	11764946	BreakDancer:Pindel:DELLY:Lumpy	score=99;PE=7:SR=4;score=5:PE=11;SR=0:SU=4	CDS	11762633	11764131	-	LOC_Os01g21090.1:cds_2
chr01	11869442	11873339	BreakDancer:Pindel:DELLY:Lumpy	score=99;PE=21:SR=6;score=15:PE=22;SR=0:SU=4	NA	NA	NA	NA	NA
chr01	11885735	11893218	BreakDancer:DELLY:Lumpy	score=99;PE=12:PE=14;SR=0:SU=5	gene	11886855	11890058	+	LOC_Os01g21290
chr01	11885735	11893218	BreakDancer:DELLY:Lumpy	score=99;PE=12:PE=14;SR=0:SU=5	mRNA	11886855	11890058	+	LOC_Os01g21290.1
chr01	11885735	11893218	BreakDancer:DELLY:Lumpy	score=99;PE=12:PE=14;SR=0:SU=5	exon	11886855	11887332	+	LOC_Os01g21290.1:exon_1
chr01	11885735	11893218	BreakDancer:DELLY:Lumpy	score=99;PE=12:PE=14;SR=0:SU=5	exon	11888176	11890058	+	LOC_Os01g21290.1:exon_2
chr01	11885735	11893218	BreakDancer:DELLY:Lumpy	score=99;PE=12:PE=14;SR=0:SU=5	CDS	11886855	11887332	+	LOC_Os01g21290.1:cds_1
chr01	11885735	11893218	BreakDancer:DELLY:Lumpy	score=99;PE=12:PE=14;SR=0:SU=5	CDS	11888176	11890058	+	LOC_Os01g21290.1:cds_2
chr01	11911486	11911738	BreakDancer:Pindel	score=99;PE=18:SR=8;score=24	NA	NA	NA	NA	NA
chr01	11945853	11947336	BreakDancer:Pindel:DELLY:Lumpy	score=99;PE=16:SR=5;score=6:PE=17;SR=0:SU=6	gene	11946745	11947056	+	LOC_Os01g21390
chr01	11945853	11947336	BreakDancer:Pindel:DELLY:Lumpy	score=99;PE=16:SR=5;score=6:PE=17;SR=0:SU=6	mRNA	11946745	11947056	+	LOC_Os01g21390.1
chr01	11945853	11947336	BreakDancer:Pindel:DELLY:Lumpy	score=99;PE=16:SR=5;score=6:PE=17;SR=0:SU=6	exon	11946745	11947056	+	LOC_Os01g21390.1:exon_1
chr01	11945853	11947336	BreakDancer:Pindel:DELLY:Lumpy	score=99;PE=16:SR=5;score=6:PE=17;SR=0:SU=6	CDS	11946745	11947056	+	LOC_Os01g21390.1:cds_1
chr01	11992756	11993128	BreakDancer:Pindel:DELLY:SVseq2	score=99;PE=12:SR=5;score=12:PE=12;SR=0:SR=3	gene	11992632	11993683	-	LOC_Os01g21480
chr01	11992756	11993128	BreakDancer:Pindel:DELLY:SVseq2	score=99;PE=12:SR=5;score=12:PE=12;SR=0:SR=3	mRNA	11992632	11993683	-	LOC_Os01g21480.1
chr01	11992756	11993128	BreakDancer:Pindel:DELLY:SVseq2	score=99;PE=12:SR=5;score=12:PE=12;SR=0:SR=3	exon	11992632	11992964	-	LOC_Os01g21480.1:exon_3
chr01	11992756	11993128	BreakDancer:Pindel:DELLY:SVseq2	score=99;PE=12:SR=5;score=12:PE=12;SR=0:SR=3	CDS	11992632	11992964	-	LOC_Os01g21480.1:cds_3
chr01	11998865	12030654	BreakDancer:Pindel:DELLY	score=99;PE=8:SR=7;score=20:PE=9;SR=0	gene	11999382	12002924	-	LOC_Os01g21490
chr01	11998865	12030654	BreakDancer:Pindel:DELLY	score=99;PE=8:SR=7;score=20:PE=9;SR=0	mRNA	11999382	12002924	-	LOC_Os01g21490.1
chr01	11998865	12030654	BreakDancer:Pindel:DELLY	score=99;PE=8:SR=7;score=20:PE=9;SR=0	exon	12002616	12002924	-	LOC_Os01g21490.1:exon_1
chr01	11998865	12030654	BreakDancer:Pindel:DELLY	score=99;PE=8:SR=7;score=20:PE=9;SR=0	exon	12000487	12001214	-	LOC_Os01g21490.1:exon_2
chr01	11998865	12030654	BreakDancer:Pindel:DELLY	score=99;PE=8:SR=7;score=20:PE=9;SR=0	exon	12000204	12000377	-	LOC_Os01g21490.1:exon_3
chr01	11998865	12030654	BreakDancer:Pindel:DELLY	score=99;PE=8:SR=7;score=20:PE=9;SR=0	exon	11999997	12000107	-	LOC_Os01g21490.1:exon_4
chr01	11998865	12030654	BreakDancer:Pindel:DELLY	score=99;PE=8:SR=7;score=20:PE=9;SR=0	exon	11999840	11999912	-	LOC_Os01g21490.1:exon_5
chr01	11998865	12030654	BreakDancer:Pindel:DELLY	score=99;PE=8:SR=7;score=20:PE=9;SR=0	exon	11999647	11999745	-	LOC_Os01g21490.1:exon_6
chr01	11998865	12030654	BreakDancer:Pindel:DELLY	score=99;PE=8:SR=7;score=20:PE=9;SR=0	exon	11999382	11999567	-	LOC_Os01g21490.1:exon_7
chr01	11998865	12030654	BreakDancer:Pindel:DELLY	score=99;PE=8:SR=7;score=20:PE=9;SR=0	CDS	12002616	12002924	-	LOC_Os01g21490.1:cds_1
chr01	11998865	12030654	BreakDancer:Pindel:DELLY	score=99;PE=8:SR=7;score=20:PE=9;SR=0	CDS	12000487	12001214	-	LOC_Os01g21490.1:cds_2
chr01	11998865	12030654	BreakDancer:Pindel:DELLY	score=99;PE=8:SR=7;score=20:PE=9;SR=0	CDS	12000204	12000377	-	LOC_Os01g21490.1:cds_3
chr01	11998865	12030654	BreakDancer:Pindel:DELLY	score=99;PE=8:SR=7;score=20:PE=9;SR=0	CDS	11999997	12000107	-	LOC_Os01g21490.1:cds_4
chr01	11998865	12030654	BreakDancer:Pindel:DELLY	score=99;PE=8:SR=7;score=20:PE=9;SR=0	CDS	11999840	11999912	-	LOC_Os01g21490.1:cds_5
chr01	11998865	12030654	BreakDancer:Pindel:DELLY	score=99;PE=8:SR=7;score=20:PE=9;SR=0	CDS	11999647	11999745	-	LOC_Os01g21490.1:cds_6
chr01	11998865	12030654	BreakDancer:Pindel:DELLY	score=99;PE=8:SR=7;score=20:PE=9;SR=0	CDS	11999382	11999567	-	LOC_Os01g21490.1:cds_7
chr01	11998865	12030654	BreakDancer:Pindel:DELLY	score=99;PE=8:SR=7;score=20:PE=9;SR=0	gene	12010580	12011810	-	LOC_Os01g21500
chr01	11998865	12030654	BreakDancer:Pindel:DELLY	score=99;PE=8:SR=7;score=20:PE=9;SR=0	mRNA	12010580	12011810	-	LOC_Os01g21500.1
chr01	11998865	12030654	BreakDancer:Pindel:DELLY	score=99;PE=8:SR=7;score=20:PE=9;SR=0	exon	12010874	12011810	-	LOC_Os01g21500.1:exon_1
chr01	11998865	12030654	BreakDancer:Pindel:DELLY	score=99;PE=8:SR=7;score=20:PE=9;SR=0	exon	12010580	12010806	-	LOC_Os01g21500.1:exon_2
chr01	11998865	12030654	BreakDancer:Pindel:DELLY	score=99;PE=8:SR=7;score=20:PE=9;SR=0	CDS	12010874	12011810	-	LOC_Os01g21500.1:cds_1
chr01	11998865	12030654	BreakDancer:Pindel:DELLY	score=99;PE=8:SR=7;score=20:PE=9;SR=0	CDS	12010580	12010806	-	LOC_Os01g21500.1:cds_2
chr01	11998865	12030654	BreakDancer:Pindel:DELLY	score=99;PE=8:SR=7;score=20:PE=9;SR=0	gene	12022563	12027290	-	LOC_Os01g21510
chr01	11998865	12030654	BreakDancer:Pindel:DELLY	score=99;PE=8:SR=7;score=20:PE=9;SR=0	mRNA	12022563	12027290	-	LOC_Os01g21510.1
chr01	11998865	12030654	BreakDancer:Pindel:DELLY	score=99;PE=8:SR=7;score=20:PE=9;SR=0	exon	12027147	12027290	-	LOC_Os01g21510.1:exon_1
chr01	11998865	12030654	BreakDancer:Pindel:DELLY	score=99;PE=8:SR=7;score=20:PE=9;SR=0	exon	12022948	12025868	-	LOC_Os01g21510.1:exon_2
chr01	11998865	12030654	BreakDancer:Pindel:DELLY	score=99;PE=8:SR=7;score=20:PE=9;SR=0	exon	12022563	12022899	-	LOC_Os01g21510.1:exon_3
chr01	11998865	12030654	BreakDancer:Pindel:DELLY	score=99;PE=8:SR=7;score=20:PE=9;SR=0	CDS	12027147	12027290	-	LOC_Os01g21510.1:cds_1
chr01	11998865	12030654	BreakDancer:Pindel:DELLY	score=99;PE=8:SR=7;score=20:PE=9;SR=0	CDS	12022948	12025868	-	LOC_Os01g21510.1:cds_2
chr01	11998865	12030654	BreakDancer:Pindel:DELLY	score=99;PE=8:SR=7;score=20:PE=9;SR=0	CDS	12022563	12022899	-	LOC_Os01g21510.1:cds_3
chr01	12095533	12096736	BreakDancer:DELLY:Lumpy	score=99;PE=12:PE=15;SR=0:SU=5	NA	NA	NA	NA	NA
chr01	12123356	12124047	BreakDancer:Pindel:DELLY	score=99;PE=10:SR=9;score=28:PE=11;SR=0	NA	NA	NA	NA	NA
chr01	12140867	12141596	BreakDancer:Pindel:DELLY:SVseq2:Lumpy:softSearch	score=99;PE=61:SR=21;score=132:PE=61;SR=10:SR=5:SU=14:nr=66;sc=10	NA	NA	NA	NA	NA
chr01	12141860	12142008	BreakDancer:Pindel	score=99;PE=15:SR=5;score=6	NA	NA	NA	NA	NA
chr01	12249820	12257901	BreakDancer:Pindel:DELLY:SVseq2:Lumpy:softSearch	score=99;PE=12:SR=13;score=50:PE=12;SR=0:SR=8:SU=4:nr=12;sc=6	gene	12250987	12257719	+	LOC_Os01g21840
chr01	12249820	12257901	BreakDancer:Pindel:DELLY:SVseq2:Lumpy:softSearch	score=99;PE=12:SR=13;score=50:PE=12;SR=0:SR=8:SU=4:nr=12;sc=6	mRNA	12250987	12257719	+	LOC_Os01g21840.1
chr01	12249820	12257901	BreakDancer:Pindel:DELLY:SVseq2:Lumpy:softSearch	score=99;PE=12:SR=13;score=50:PE=12;SR=0:SR=8:SU=4:nr=12;sc=6	exon	12250987	12253429	+	LOC_Os01g21840.1:exon_1
chr01	12249820	12257901	BreakDancer:Pindel:DELLY:SVseq2:Lumpy:softSearch	score=99;PE=12:SR=13;score=50:PE=12;SR=0:SR=8:SU=4:nr=12;sc=6	exon	12253815	12253965	+	LOC_Os01g21840.1:exon_2
chr01	12249820	12257901	BreakDancer:Pindel:DELLY:SVseq2:Lumpy:softSearch	score=99;PE=12:SR=13;score=50:PE=12;SR=0:SR=8:SU=4:nr=12;sc=6	exon	12254038	12254407	+	LOC_Os01g21840.1:exon_3
chr01	12249820	12257901	BreakDancer:Pindel:DELLY:SVseq2:Lumpy:softSearch	score=99;PE=12:SR=13;score=50:PE=12;SR=0:SR=8:SU=4:nr=12;sc=6	exon	12254492	12254902	+	LOC_Os01g21840.1:exon_4
chr01	12249820	12257901	BreakDancer:Pindel:DELLY:SVseq2:Lumpy:softSearch	score=99;PE=12:SR=13;score=50:PE=12;SR=0:SR=8:SU=4:nr=12;sc=6	exon	12254993	12255291	+	LOC_Os01g21840.1:exon_5
chr01	12249820	12257901	BreakDancer:Pindel:DELLY:SVseq2:Lumpy:softSearch	score=99;PE=12:SR=13;score=50:PE=12;SR=0:SR=8:SU=4:nr=12;sc=6	exon	12255368	12255626	+	LOC_Os01g21840.1:exon_6
chr01	12249820	12257901	BreakDancer:Pindel:DELLY:SVseq2:Lumpy:softSearch	score=99;PE=12:SR=13;score=50:PE=12;SR=0:SR=8:SU=4:nr=12;sc=6	exon	12255719	12255968	+	LOC_Os01g21840.1:exon_7
chr01	12249820	12257901	BreakDancer:Pindel:DELLY:SVseq2:Lumpy:softSearch	score=99;PE=12:SR=13;score=50:PE=12;SR=0:SR=8:SU=4:nr=12;sc=6	exon	12256215	12256346	+	LOC_Os01g21840.1:exon_8
chr01	12249820	12257901	BreakDancer:Pindel:DELLY:SVseq2:Lumpy:softSearch	score=99;PE=12:SR=13;score=50:PE=12;SR=0:SR=8:SU=4:nr=12;sc=6	exon	12256407	12256679	+	LOC_Os01g21840.1:exon_9
chr01	12249820	12257901	BreakDancer:Pindel:DELLY:SVseq2:Lumpy:softSearch	score=99;PE=12:SR=13;score=50:PE=12;SR=0:SR=8:SU=4:nr=12;sc=6	exon	12257475	12257719	+	LOC_Os01g21840.1:exon_10
chr01	12249820	12257901	BreakDancer:Pindel:DELLY:SVseq2:Lumpy:softSearch	score=99;PE=12:SR=13;score=50:PE=12;SR=0:SR=8:SU=4:nr=12;sc=6	CDS	12250987	12253429	+	LOC_Os01g21840.1:cds_1
chr01	12249820	12257901	BreakDancer:Pindel:DELLY:SVseq2:Lumpy:softSearch	score=99;PE=12:SR=13;score=50:PE=12;SR=0:SR=8:SU=4:nr=12;sc=6	CDS	12253815	12253965	+	LOC_Os01g21840.1:cds_2
chr01	12249820	12257901	BreakDancer:Pindel:DELLY:SVseq2:Lumpy:softSearch	score=99;PE=12:SR=13;score=50:PE=12;SR=0:SR=8:SU=4:nr=12;sc=6	CDS	12254038	12254407	+	LOC_Os01g21840.1:cds_3
chr01	12249820	12257901	BreakDancer:Pindel:DELLY:SVseq2:Lumpy:softSearch	score=99;PE=12:SR=13;score=50:PE=12;SR=0:SR=8:SU=4:nr=12;sc=6	CDS	12254492	12254902	+	LOC_Os01g21840.1:cds_4
chr01	12249820	12257901	BreakDancer:Pindel:DELLY:SVseq2:Lumpy:softSearch	score=99;PE=12:SR=13;score=50:PE=12;SR=0:SR=8:SU=4:nr=12;sc=6	CDS	12254993	12255291	+	LOC_Os01g21840.1:cds_5
chr01	12249820	12257901	BreakDancer:Pindel:DELLY:SVseq2:Lumpy:softSearch	score=99;PE=12:SR=13;score=50:PE=12;SR=0:SR=8:SU=4:nr=12;sc=6	CDS	12255368	12255626	+	LOC_Os01g21840.1:cds_6
chr01	12249820	12257901	BreakDancer:Pindel:DELLY:SVseq2:Lumpy:softSearch	score=99;PE=12:SR=13;score=50:PE=12;SR=0:SR=8:SU=4:nr=12;sc=6	CDS	12255719	12255968	+	LOC_Os01g21840.1:cds_7
chr01	12249820	12257901	BreakDancer:Pindel:DELLY:SVseq2:Lumpy:softSearch	score=99;PE=12:SR=13;score=50:PE=12;SR=0:SR=8:SU=4:nr=12;sc=6	CDS	12256215	12256346	+	LOC_Os01g21840.1:cds_8
chr01	12249820	12257901	BreakDancer:Pindel:DELLY:SVseq2:Lumpy:softSearch	score=99;PE=12:SR=13;score=50:PE=12;SR=0:SR=8:SU=4:nr=12;sc=6	CDS	12256407	12256679	+	LOC_Os01g21840.1:cds_9
chr01	12249820	12257901	BreakDancer:Pindel:DELLY:SVseq2:Lumpy:softSearch	score=99;PE=12:SR=13;score=50:PE=12;SR=0:SR=8:SU=4:nr=12;sc=6	CDS	12257475	12257719	+	LOC_Os01g21840.1:cds_10
chr01	12290510	12291388	BreakDancer:DELLY:Lumpy	score=90;PE=5:PE=5;SR=0:SU=5	NA	NA	NA	NA	NA
chr01	12292238	12292454	BreakDancer:Pindel:SVseq2	score=99;PE=14:SR=9;score=28:SR=4	gene	12291788	12294943	-	LOC_Os01g21900
chr01	12292238	12292454	BreakDancer:Pindel:SVseq2	score=99;PE=14:SR=9;score=28:SR=4	five_prime_UTR	12292353	12292378	-	LOC_Os01g21900.1:utr_2
chr01	12292238	12292454	BreakDancer:Pindel:SVseq2	score=99;PE=14:SR=9;score=28:SR=4	CDS	12292081	12292352	-	LOC_Os01g21900.1:cds_1
chr01	12292238	12292454	BreakDancer:Pindel:SVseq2	score=99;PE=14:SR=9;score=28:SR=4	mRNA	12291788	12294943	-	LOC_Os01g21900.1
chr01	12292238	12292454	BreakDancer:Pindel:SVseq2	score=99;PE=14:SR=9;score=28:SR=4	exon	12292081	12292378	-	LOC_Os01g21900.1:exon_2
chr01	12293392	12294293	BreakDancer:Pindel:DELLY:Lumpy	score=99;PE=14:SR=8;score=24:PE=14;SR=0:SU=5	gene	12291788	12294943	-	LOC_Os01g21900
chr01	12293392	12294293	BreakDancer:Pindel:DELLY:Lumpy	score=99;PE=14:SR=8;score=24:PE=14;SR=0:SU=5	mRNA	12291788	12294943	-	LOC_Os01g21900.1
chr01	12325959	12326474	BreakDancer:Pindel:DELLY	score=99;PE=7:SR=7;score=18:PE=8;SR=0	NA	NA	NA	NA	NA
chr01	12367636	12367978	BreakDancer:Pindel:DELLY:SVseq2	score=99;PE=8:SR=13;score=44:PE=8;SR=3:SR=4	NA	NA	NA	NA	NA
chr01	12474404	12486414	BreakDancer:Pindel:DELLY:Lumpy	score=99;PE=6:SR=3;score=4:PE=11;SR=0:SU=4	gene	12474253	12482475	+	LOC_Os01g22190
chr01	12474404	12486414	BreakDancer:Pindel:DELLY:Lumpy	score=99;PE=6:SR=3;score=4:PE=11;SR=0:SU=4	mRNA	12474253	12482475	+	LOC_Os01g22190.1
chr01	12474404	12486414	BreakDancer:Pindel:DELLY:Lumpy	score=99;PE=6:SR=3;score=4:PE=11;SR=0:SU=4	exon	12474253	12474476	+	LOC_Os01g22190.1:exon_1
chr01	12474404	12486414	BreakDancer:Pindel:DELLY:Lumpy	score=99;PE=6:SR=3;score=4:PE=11;SR=0:SU=4	exon	12475351	12475402	+	LOC_Os01g22190.1:exon_2
chr01	12474404	12486414	BreakDancer:Pindel:DELLY:Lumpy	score=99;PE=6:SR=3;score=4:PE=11;SR=0:SU=4	exon	12475474	12476163	+	LOC_Os01g22190.1:exon_3
chr01	12474404	12486414	BreakDancer:Pindel:DELLY:Lumpy	score=99;PE=6:SR=3;score=4:PE=11;SR=0:SU=4	exon	12476404	12476785	+	LOC_Os01g22190.1:exon_4
chr01	12474404	12486414	BreakDancer:Pindel:DELLY:Lumpy	score=99;PE=6:SR=3;score=4:PE=11;SR=0:SU=4	exon	12477026	12477644	+	LOC_Os01g22190.1:exon_5
chr01	12474404	12486414	BreakDancer:Pindel:DELLY:Lumpy	score=99;PE=6:SR=3;score=4:PE=11;SR=0:SU=4	exon	12477731	12478579	+	LOC_Os01g22190.1:exon_6
chr01	12474404	12486414	BreakDancer:Pindel:DELLY:Lumpy	score=99;PE=6:SR=3;score=4:PE=11;SR=0:SU=4	exon	12480518	12480554	+	LOC_Os01g22190.1:exon_7
chr01	12474404	12486414	BreakDancer:Pindel:DELLY:Lumpy	score=99;PE=6:SR=3;score=4:PE=11;SR=0:SU=4	exon	12481507	12482475	+	LOC_Os01g22190.1:exon_8
chr01	12474404	12486414	BreakDancer:Pindel:DELLY:Lumpy	score=99;PE=6:SR=3;score=4:PE=11;SR=0:SU=4	CDS	12474253	12474476	+	LOC_Os01g22190.1:cds_1
chr01	12474404	12486414	BreakDancer:Pindel:DELLY:Lumpy	score=99;PE=6:SR=3;score=4:PE=11;SR=0:SU=4	CDS	12475351	12475402	+	LOC_Os01g22190.1:cds_2
chr01	12474404	12486414	BreakDancer:Pindel:DELLY:Lumpy	score=99;PE=6:SR=3;score=4:PE=11;SR=0:SU=4	CDS	12475474	12476163	+	LOC_Os01g22190.1:cds_3
chr01	12474404	12486414	BreakDancer:Pindel:DELLY:Lumpy	score=99;PE=6:SR=3;score=4:PE=11;SR=0:SU=4	CDS	12476404	12476785	+	LOC_Os01g22190.1:cds_4
chr01	12474404	12486414	BreakDancer:Pindel:DELLY:Lumpy	score=99;PE=6:SR=3;score=4:PE=11;SR=0:SU=4	CDS	12477026	12477644	+	LOC_Os01g22190.1:cds_5
chr01	12474404	12486414	BreakDancer:Pindel:DELLY:Lumpy	score=99;PE=6:SR=3;score=4:PE=11;SR=0:SU=4	CDS	12477731	12478579	+	LOC_Os01g22190.1:cds_6
chr01	12474404	12486414	BreakDancer:Pindel:DELLY:Lumpy	score=99;PE=6:SR=3;score=4:PE=11;SR=0:SU=4	CDS	12480518	12480554	+	LOC_Os01g22190.1:cds_7
chr01	12474404	12486414	BreakDancer:Pindel:DELLY:Lumpy	score=99;PE=6:SR=3;score=4:PE=11;SR=0:SU=4	CDS	12481507	12482475	+	LOC_Os01g22190.1:cds_8
chr01	12474404	12486414	BreakDancer:Pindel:DELLY:Lumpy	score=99;PE=6:SR=3;score=4:PE=11;SR=0:SU=4	gene	12483081	12485539	+	LOC_Os01g22200
chr01	12474404	12486414	BreakDancer:Pindel:DELLY:Lumpy	score=99;PE=6:SR=3;score=4:PE=11;SR=0:SU=4	mRNA	12483081	12485539	+	LOC_Os01g22200.1
chr01	12474404	12486414	BreakDancer:Pindel:DELLY:Lumpy	score=99;PE=6:SR=3;score=4:PE=11;SR=0:SU=4	exon	12483081	12483105	+	LOC_Os01g22200.1:exon_1
chr01	12474404	12486414	BreakDancer:Pindel:DELLY:Lumpy	score=99;PE=6:SR=3;score=4:PE=11;SR=0:SU=4	exon	12483728	12484066	+	LOC_Os01g22200.1:exon_2
chr01	12474404	12486414	BreakDancer:Pindel:DELLY:Lumpy	score=99;PE=6:SR=3;score=4:PE=11;SR=0:SU=4	exon	12484112	12484502	+	LOC_Os01g22200.1:exon_3
chr01	12474404	12486414	BreakDancer:Pindel:DELLY:Lumpy	score=99;PE=6:SR=3;score=4:PE=11;SR=0:SU=4	exon	12484607	12484780	+	LOC_Os01g22200.1:exon_4
chr01	12474404	12486414	BreakDancer:Pindel:DELLY:Lumpy	score=99;PE=6:SR=3;score=4:PE=11;SR=0:SU=4	exon	12484875	12484985	+	LOC_Os01g22200.1:exon_5
chr01	12474404	12486414	BreakDancer:Pindel:DELLY:Lumpy	score=99;PE=6:SR=3;score=4:PE=11;SR=0:SU=4	exon	12485069	12485141	+	LOC_Os01g22200.1:exon_6
chr01	12474404	12486414	BreakDancer:Pindel:DELLY:Lumpy	score=99;PE=6:SR=3;score=4:PE=11;SR=0:SU=4	exon	12485239	12485337	+	LOC_Os01g22200.1:exon_7
chr01	12474404	12486414	BreakDancer:Pindel:DELLY:Lumpy	score=99;PE=6:SR=3;score=4:PE=11;SR=0:SU=4	exon	12485417	12485539	+	LOC_Os01g22200.1:exon_8
chr01	12474404	12486414	BreakDancer:Pindel:DELLY:Lumpy	score=99;PE=6:SR=3;score=4:PE=11;SR=0:SU=4	CDS	12483081	12483105	+	LOC_Os01g22200.1:cds_1
chr01	12474404	12486414	BreakDancer:Pindel:DELLY:Lumpy	score=99;PE=6:SR=3;score=4:PE=11;SR=0:SU=4	CDS	12483728	12484066	+	LOC_Os01g22200.1:cds_2
chr01	12474404	12486414	BreakDancer:Pindel:DELLY:Lumpy	score=99;PE=6:SR=3;score=4:PE=11;SR=0:SU=4	CDS	12484112	12484502	+	LOC_Os01g22200.1:cds_3
chr01	12474404	12486414	BreakDancer:Pindel:DELLY:Lumpy	score=99;PE=6:SR=3;score=4:PE=11;SR=0:SU=4	CDS	12484607	12484780	+	LOC_Os01g22200.1:cds_4
chr01	12474404	12486414	BreakDancer:Pindel:DELLY:Lumpy	score=99;PE=6:SR=3;score=4:PE=11;SR=0:SU=4	CDS	12484875	12484985	+	LOC_Os01g22200.1:cds_5
chr01	12474404	12486414	BreakDancer:Pindel:DELLY:Lumpy	score=99;PE=6:SR=3;score=4:PE=11;SR=0:SU=4	CDS	12485069	12485141	+	LOC_Os01g22200.1:cds_6
chr01	12474404	12486414	BreakDancer:Pindel:DELLY:Lumpy	score=99;PE=6:SR=3;score=4:PE=11;SR=0:SU=4	CDS	12485239	12485337	+	LOC_Os01g22200.1:cds_7
chr01	12474404	12486414	BreakDancer:Pindel:DELLY:Lumpy	score=99;PE=6:SR=3;score=4:PE=11;SR=0:SU=4	CDS	12485417	12485539	+	LOC_Os01g22200.1:cds_8
chr01	12491345	12492814	BreakDancer:Pindel:DELLY:CNVnator	score=99;PE=7:SR=8;score=24:PE=9;SR=0:eval1=259.612;eval2=0.0108978;eval3=1;eval4=1	gene	12491993	12494656	-	LOC_Os01g22220
chr01	12491345	12492814	BreakDancer:Pindel:DELLY:CNVnator	score=99;PE=7:SR=8;score=24:PE=9;SR=0:eval1=259.612;eval2=0.0108978;eval3=1;eval4=1	mRNA	12491993	12494656	-	LOC_Os01g22220.1
chr01	12491345	12492814	BreakDancer:Pindel:DELLY:CNVnator	score=99;PE=7:SR=8;score=24:PE=9;SR=0:eval1=259.612;eval2=0.0108978;eval3=1;eval4=1	exon	12491993	12492132	-	LOC_Os01g22220.1:exon_2
chr01	12491345	12492814	BreakDancer:Pindel:DELLY:CNVnator	score=99;PE=7:SR=8;score=24:PE=9;SR=0:eval1=259.612;eval2=0.0108978;eval3=1;eval4=1	CDS	12491993	12492132	-	LOC_Os01g22220.1:cds_2
chr01	12565443	12566000	BreakDancer:DELLY	score=82;PE=4:PE=5;SR=0	gene	12564283	12570032	+	LOC_Os01g22352
chr01	12565443	12566000	BreakDancer:DELLY	score=82;PE=4:PE=5;SR=0	mRNA	12564283	12570032	+	LOC_Os01g22352.1
chr01	12568134	12568307	BreakDancer:Pindel	score=99;PE=5:SR=3;score=6	gene	12564283	12570032	+	LOC_Os01g22352
chr01	12568134	12568307	BreakDancer:Pindel	score=99;PE=5:SR=3;score=6	mRNA	12564283	12570032	+	LOC_Os01g22352.1
chr01	12577444	12578086	BreakDancer:DELLY:Lumpy	score=99;PE=6:PE=10;SR=0:SU=6	NA	NA	NA	NA	NA
chr01	12678782	12679612	BreakDancer:DELLY:SVseq2:Lumpy	score=99;PE=15:PE=13;SR=0:SR=5:SU=4	NA	NA	NA	NA	NA
chr01	12681570	12682091	BreakDancer:Pindel:DELLY:SVseq2:Lumpy	score=99;PE=7:SR=8;score=21:PE=9;SR=0:SR=3:SU=4	NA	NA	NA	NA	NA
chr01	12714264	12717357	BreakDancer:DELLY	score=99;PE=5:PE=5;SR=0	NA	NA	NA	NA	NA
chr01	12718696	12724850	BreakDancer:Pindel:DELLY:Lumpy	score=99;PE=13:SR=7;score=20:PE=14;SR=0:SU=4	gene	12723151	12724428	-	LOC_Os01g22620
chr01	12718696	12724850	BreakDancer:Pindel:DELLY:Lumpy	score=99;PE=13:SR=7;score=20:PE=14;SR=0:SU=4	mRNA	12723151	12724428	-	LOC_Os01g22620.1
chr01	12718696	12724850	BreakDancer:Pindel:DELLY:Lumpy	score=99;PE=13:SR=7;score=20:PE=14;SR=0:SU=4	exon	12723151	12724428	-	LOC_Os01g22620.1:exon_1
chr01	12718696	12724850	BreakDancer:Pindel:DELLY:Lumpy	score=99;PE=13:SR=7;score=20:PE=14;SR=0:SU=4	CDS	12723151	12724428	-	LOC_Os01g22620.1:cds_1
chr01	12779960	12803432	DELLY:Lumpy	PE=11;SR=0:SU=4	gene	12781694	12784921	+	LOC_Os01g22740
chr01	12779960	12803432	DELLY:Lumpy	PE=11;SR=0:SU=4	mRNA	12781694	12784921	+	LOC_Os01g22740.1
chr01	12779960	12803432	DELLY:Lumpy	PE=11;SR=0:SU=4	exon	12781694	12782658	+	LOC_Os01g22740.1:exon_1
chr01	12779960	12803432	DELLY:Lumpy	PE=11;SR=0:SU=4	exon	12782722	12782955	+	LOC_Os01g22740.1:exon_2
chr01	12779960	12803432	DELLY:Lumpy	PE=11;SR=0:SU=4	exon	12783049	12784921	+	LOC_Os01g22740.1:exon_3
chr01	12779960	12803432	DELLY:Lumpy	PE=11;SR=0:SU=4	CDS	12781694	12782658	+	LOC_Os01g22740.1:cds_1
chr01	12779960	12803432	DELLY:Lumpy	PE=11;SR=0:SU=4	CDS	12782722	12782955	+	LOC_Os01g22740.1:cds_2
chr01	12779960	12803432	DELLY:Lumpy	PE=11;SR=0:SU=4	CDS	12783049	12784921	+	LOC_Os01g22740.1:cds_3
chr01	12779960	12803432	DELLY:Lumpy	PE=11;SR=0:SU=4	gene	12785540	12791695	-	LOC_Os01g22750
chr01	12779960	12803432	DELLY:Lumpy	PE=11;SR=0:SU=4	mRNA	12785540	12791695	-	LOC_Os01g22750.1
chr01	12779960	12803432	DELLY:Lumpy	PE=11;SR=0:SU=4	exon	12789341	12791695	-	LOC_Os01g22750.1:exon_1
chr01	12779960	12803432	DELLY:Lumpy	PE=11;SR=0:SU=4	exon	12787685	12789268	-	LOC_Os01g22750.1:exon_2
chr01	12779960	12803432	DELLY:Lumpy	PE=11;SR=0:SU=4	exon	12785540	12787561	-	LOC_Os01g22750.1:exon_3
chr01	12779960	12803432	DELLY:Lumpy	PE=11;SR=0:SU=4	CDS	12789341	12791695	-	LOC_Os01g22750.1:cds_1
chr01	12779960	12803432	DELLY:Lumpy	PE=11;SR=0:SU=4	CDS	12787685	12789268	-	LOC_Os01g22750.1:cds_2
chr01	12779960	12803432	DELLY:Lumpy	PE=11;SR=0:SU=4	CDS	12785540	12787561	-	LOC_Os01g22750.1:cds_3
chr01	12779960	12803432	DELLY:Lumpy	PE=11;SR=0:SU=4	gene	12797195	12798602	-	LOC_Os01g22760
chr01	12779960	12803432	DELLY:Lumpy	PE=11;SR=0:SU=4	mRNA	12797195	12798602	-	LOC_Os01g22760.1
chr01	12779960	12803432	DELLY:Lumpy	PE=11;SR=0:SU=4	exon	12798047	12798602	-	LOC_Os01g22760.1:exon_1
chr01	12779960	12803432	DELLY:Lumpy	PE=11;SR=0:SU=4	exon	12797354	12797656	-	LOC_Os01g22760.1:exon_2
chr01	12779960	12803432	DELLY:Lumpy	PE=11;SR=0:SU=4	exon	12797195	12797322	-	LOC_Os01g22760.1:exon_3
chr01	12779960	12803432	DELLY:Lumpy	PE=11;SR=0:SU=4	CDS	12798047	12798602	-	LOC_Os01g22760.1:cds_1
chr01	12779960	12803432	DELLY:Lumpy	PE=11;SR=0:SU=4	CDS	12797354	12797656	-	LOC_Os01g22760.1:cds_2
chr01	12779960	12803432	DELLY:Lumpy	PE=11;SR=0:SU=4	CDS	12797195	12797322	-	LOC_Os01g22760.1:cds_3
chr01	12779960	12803432	DELLY:Lumpy	PE=11;SR=0:SU=4	gene	12803326	12803709	-	LOC_Os01g22770
chr01	12779960	12803432	DELLY:Lumpy	PE=11;SR=0:SU=4	mRNA	12803326	12803709	-	LOC_Os01g22770.1
chr01	12779960	12803432	DELLY:Lumpy	PE=11;SR=0:SU=4	exon	12803326	12803470	-	LOC_Os01g22770.1:exon_2
chr01	12779960	12803432	DELLY:Lumpy	PE=11;SR=0:SU=4	CDS	12803326	12803470	-	LOC_Os01g22770.1:cds_2
chr01	12810048	12813216	BreakDancer:Pindel:DELLY:Lumpy	score=99;PE=17:SR=8;score=25:PE=18;SR=0:SU=4	gene	12804579	12810224	+	LOC_Os01g22780
chr01	12810048	12813216	BreakDancer:Pindel:DELLY:Lumpy	score=99;PE=17:SR=8;score=25:PE=18;SR=0:SU=4	mRNA	12804579	12810204	+	LOC_Os01g22780.1
chr01	12810048	12813216	BreakDancer:Pindel:DELLY:Lumpy	score=99;PE=17:SR=8;score=25:PE=18;SR=0:SU=4	exon	12809699	12810204	+	LOC_Os01g22780.1:exon_4
chr01	12810048	12813216	BreakDancer:Pindel:DELLY:Lumpy	score=99;PE=17:SR=8;score=25:PE=18;SR=0:SU=4	three_prime_UTR	12810031	12810204	+	LOC_Os01g22780.1:utr_2
chr01	12810048	12813216	BreakDancer:Pindel:DELLY:Lumpy	score=99;PE=17:SR=8;score=25:PE=18;SR=0:SU=4	mRNA	12804579	12810224	+	LOC_Os01g22780.2
chr01	12810048	12813216	BreakDancer:Pindel:DELLY:Lumpy	score=99;PE=17:SR=8;score=25:PE=18;SR=0:SU=4	exon	12809721	12810224	+	LOC_Os01g22780.2:exon_4
chr01	12810048	12813216	BreakDancer:Pindel:DELLY:Lumpy	score=99;PE=17:SR=8;score=25:PE=18;SR=0:SU=4	three_prime_UTR	12809954	12810224	+	LOC_Os01g22780.2:utr_2
chr01	12860712	12867215	BreakDancer:Pindel:DELLY:CNVnator:Lumpy	score=99;PE=21:SR=14;score=63:PE=22;SR=4:eval1=1.69514e-08;eval2=1.76597e-05;eval3=5.84599e-05;eval4=0.132655:SU=5	gene	12861729	12865951	+	LOC_Os01g22890
chr01	12860712	12867215	BreakDancer:Pindel:DELLY:CNVnator:Lumpy	score=99;PE=21:SR=14;score=63:PE=22;SR=4:eval1=1.69514e-08;eval2=1.76597e-05;eval3=5.84599e-05;eval4=0.132655:SU=5	mRNA	12861729	12865951	+	LOC_Os01g22890.1
chr01	12860712	12867215	BreakDancer:Pindel:DELLY:CNVnator:Lumpy	score=99;PE=21:SR=14;score=63:PE=22;SR=4:eval1=1.69514e-08;eval2=1.76597e-05;eval3=5.84599e-05;eval4=0.132655:SU=5	exon	12861729	12861836	+	LOC_Os01g22890.1:exon_1
chr01	12860712	12867215	BreakDancer:Pindel:DELLY:CNVnator:Lumpy	score=99;PE=21:SR=14;score=63:PE=22;SR=4:eval1=1.69514e-08;eval2=1.76597e-05;eval3=5.84599e-05;eval4=0.132655:SU=5	exon	12861879	12865424	+	LOC_Os01g22890.1:exon_2
chr01	12860712	12867215	BreakDancer:Pindel:DELLY:CNVnator:Lumpy	score=99;PE=21:SR=14;score=63:PE=22;SR=4:eval1=1.69514e-08;eval2=1.76597e-05;eval3=5.84599e-05;eval4=0.132655:SU=5	exon	12865472	12865633	+	LOC_Os01g22890.1:exon_3
chr01	12860712	12867215	BreakDancer:Pindel:DELLY:CNVnator:Lumpy	score=99;PE=21:SR=14;score=63:PE=22;SR=4:eval1=1.69514e-08;eval2=1.76597e-05;eval3=5.84599e-05;eval4=0.132655:SU=5	exon	12865847	12865951	+	LOC_Os01g22890.1:exon_4
chr01	12860712	12867215	BreakDancer:Pindel:DELLY:CNVnator:Lumpy	score=99;PE=21:SR=14;score=63:PE=22;SR=4:eval1=1.69514e-08;eval2=1.76597e-05;eval3=5.84599e-05;eval4=0.132655:SU=5	CDS	12861729	12861836	+	LOC_Os01g22890.1:cds_1
chr01	12860712	12867215	BreakDancer:Pindel:DELLY:CNVnator:Lumpy	score=99;PE=21:SR=14;score=63:PE=22;SR=4:eval1=1.69514e-08;eval2=1.76597e-05;eval3=5.84599e-05;eval4=0.132655:SU=5	CDS	12861879	12865424	+	LOC_Os01g22890.1:cds_2
chr01	12860712	12867215	BreakDancer:Pindel:DELLY:CNVnator:Lumpy	score=99;PE=21:SR=14;score=63:PE=22;SR=4:eval1=1.69514e-08;eval2=1.76597e-05;eval3=5.84599e-05;eval4=0.132655:SU=5	CDS	12865472	12865633	+	LOC_Os01g22890.1:cds_3
chr01	12860712	12867215	BreakDancer:Pindel:DELLY:CNVnator:Lumpy	score=99;PE=21:SR=14;score=63:PE=22;SR=4:eval1=1.69514e-08;eval2=1.76597e-05;eval3=5.84599e-05;eval4=0.132655:SU=5	CDS	12865847	12865951	+	LOC_Os01g22890.1:cds_4
chr01	12899732	12904884	BreakDancer:Pindel:DELLY:Lumpy	score=99;PE=12:SR=11;score=42:PE=11;SR=0:SU=5	gene	12896174	12915380	+	LOC_Os01g22954
chr01	12899732	12904884	BreakDancer:Pindel:DELLY:Lumpy	score=99;PE=12:SR=11;score=42:PE=11;SR=0:SU=5	mRNA	12896174	12915380	+	LOC_Os01g22954.1
chr01	12925117	12925400	BreakDancer:Pindel	score=99;PE=19:SR=4;score=8	NA	NA	NA	NA	NA
chr01	12925624	12926072	BreakDancer:DELLY	score=88;PE=5:PE=7;SR=0	NA	NA	NA	NA	NA
chr01	12977816	12978930	BreakDancer:DELLY	score=95;PE=5:PE=4;SR=0	NA	NA	NA	NA	NA
chr01	13126175	13126516	BreakDancer:DELLY	score=99;PE=17:PE=14;SR=0	NA	NA	NA	NA	NA
chr01	13201244	13201736	BreakDancer:DELLY	score=99;PE=13:PE=12;SR=0	gene	13200712	13202442	+	LOC_Os01g23510
chr01	13201244	13201736	BreakDancer:DELLY	score=99;PE=13:PE=12;SR=0	mRNA	13200712	13202442	+	LOC_Os01g23510.1
chr01	13204223	13205674	BreakDancer:Pindel:DELLY	score=99;PE=12:SR=4;score=8:PE=12;SR=0	gene	13205096	13205413	+	LOC_Os01g23520
chr01	13204223	13205674	BreakDancer:Pindel:DELLY	score=99;PE=12:SR=4;score=8:PE=12;SR=0	mRNA	13205096	13205413	+	LOC_Os01g23520.1
chr01	13204223	13205674	BreakDancer:Pindel:DELLY	score=99;PE=12:SR=4;score=8:PE=12;SR=0	exon	13205096	13205413	+	LOC_Os01g23520.1:exon_1
chr01	13204223	13205674	BreakDancer:Pindel:DELLY	score=99;PE=12:SR=4;score=8:PE=12;SR=0	CDS	13205096	13205413	+	LOC_Os01g23520.1:cds_1
chr01	13270049	13270459	BreakDancer:Pindel:DELLY	score=99;PE=17:SR=11;score=42:PE=16;SR=0	NA	NA	NA	NA	NA
chr01	13598470	13599032	BreakDancer:DELLY:Lumpy	score=99;PE=18:PE=19;SR=0:SU=7	gene	13595762	13598586	+	LOC_Os01g24120
chr01	13598470	13599032	BreakDancer:DELLY:Lumpy	score=99;PE=18:PE=19;SR=0:SU=7	mRNA	13595762	13598586	+	LOC_Os01g24120.1
chr01	13598470	13599032	BreakDancer:DELLY:Lumpy	score=99;PE=18:PE=19;SR=0:SU=7	exon	13598483	13598586	+	LOC_Os01g24120.1:exon_7
chr01	13598470	13599032	BreakDancer:DELLY:Lumpy	score=99;PE=18:PE=19;SR=0:SU=7	CDS	13598483	13598586	+	LOC_Os01g24120.1:cds_7
chr01	13624714	13635016	BreakDancer:DELLY:SVseq2:Lumpy	score=99;PE=4:PE=7;SR=0:SR=5:SU=4	gene	13624372	13624767	+	LOC_Os01g24170
chr01	13624714	13635016	BreakDancer:DELLY:SVseq2:Lumpy	score=99;PE=4:PE=7;SR=0:SR=5:SU=4	mRNA	13624372	13624767	+	LOC_Os01g24170.1
chr01	13624714	13635016	BreakDancer:DELLY:SVseq2:Lumpy	score=99;PE=4:PE=7;SR=0:SR=5:SU=4	exon	13624591	13624767	+	LOC_Os01g24170.1:exon_2
chr01	13624714	13635016	BreakDancer:DELLY:SVseq2:Lumpy	score=99;PE=4:PE=7;SR=0:SR=5:SU=4	CDS	13624591	13624767	+	LOC_Os01g24170.1:cds_2
chr01	13624714	13635016	BreakDancer:DELLY:SVseq2:Lumpy	score=99;PE=4:PE=7;SR=0:SR=5:SU=4	gene	13626406	13630428	+	LOC_Os01g24180
chr01	13624714	13635016	BreakDancer:DELLY:SVseq2:Lumpy	score=99;PE=4:PE=7;SR=0:SR=5:SU=4	mRNA	13626406	13630428	+	LOC_Os01g24180.1
chr01	13624714	13635016	BreakDancer:DELLY:SVseq2:Lumpy	score=99;PE=4:PE=7;SR=0:SR=5:SU=4	exon	13626406	13626636	+	LOC_Os01g24180.1:exon_1
chr01	13624714	13635016	BreakDancer:DELLY:SVseq2:Lumpy	score=99;PE=4:PE=7;SR=0:SR=5:SU=4	exon	13627940	13629332	+	LOC_Os01g24180.1:exon_2
chr01	13624714	13635016	BreakDancer:DELLY:SVseq2:Lumpy	score=99;PE=4:PE=7;SR=0:SR=5:SU=4	exon	13630070	13630428	+	LOC_Os01g24180.1:exon_3
chr01	13624714	13635016	BreakDancer:DELLY:SVseq2:Lumpy	score=99;PE=4:PE=7;SR=0:SR=5:SU=4	CDS	13626406	13626636	+	LOC_Os01g24180.1:cds_1
chr01	13624714	13635016	BreakDancer:DELLY:SVseq2:Lumpy	score=99;PE=4:PE=7;SR=0:SR=5:SU=4	CDS	13627940	13629332	+	LOC_Os01g24180.1:cds_2
chr01	13624714	13635016	BreakDancer:DELLY:SVseq2:Lumpy	score=99;PE=4:PE=7;SR=0:SR=5:SU=4	CDS	13630070	13630428	+	LOC_Os01g24180.1:cds_3
chr01	13624714	13635016	BreakDancer:DELLY:SVseq2:Lumpy	score=99;PE=4:PE=7;SR=0:SR=5:SU=4	gene	13630851	13632922	-	LOC_Os01g24190
chr01	13624714	13635016	BreakDancer:DELLY:SVseq2:Lumpy	score=99;PE=4:PE=7;SR=0:SR=5:SU=4	mRNA	13630851	13632922	-	LOC_Os01g24190.1
chr01	13624714	13635016	BreakDancer:DELLY:SVseq2:Lumpy	score=99;PE=4:PE=7;SR=0:SR=5:SU=4	exon	13632786	13632922	-	LOC_Os01g24190.1:exon_1
chr01	13624714	13635016	BreakDancer:DELLY:SVseq2:Lumpy	score=99;PE=4:PE=7;SR=0:SR=5:SU=4	exon	13631157	13631202	-	LOC_Os01g24190.1:exon_2
chr01	13624714	13635016	BreakDancer:DELLY:SVseq2:Lumpy	score=99;PE=4:PE=7;SR=0:SR=5:SU=4	exon	13630851	13630874	-	LOC_Os01g24190.1:exon_3
chr01	13624714	13635016	BreakDancer:DELLY:SVseq2:Lumpy	score=99;PE=4:PE=7;SR=0:SR=5:SU=4	CDS	13632786	13632922	-	LOC_Os01g24190.1:cds_1
chr01	13624714	13635016	BreakDancer:DELLY:SVseq2:Lumpy	score=99;PE=4:PE=7;SR=0:SR=5:SU=4	CDS	13631157	13631202	-	LOC_Os01g24190.1:cds_2
chr01	13624714	13635016	BreakDancer:DELLY:SVseq2:Lumpy	score=99;PE=4:PE=7;SR=0:SR=5:SU=4	CDS	13630851	13630874	-	LOC_Os01g24190.1:cds_3
chr01	13658827	13661978	BreakDancer:Pindel:DELLY:SVseq2	score=99;PE=8:SR=7;score=14:PE=8;SR=0:SR=3	NA	NA	NA	NA	NA
chr01	13720583	13723606	BreakDancer:DELLY:Lumpy	score=99;PE=20:PE=20;SR=0:SU=7	NA	NA	NA	NA	NA
chr01	13763048	13766071	BreakDancer:Pindel:DELLY:Lumpy	score=99;PE=15:SR=10;score=35:PE=15;SR=0:SU=4	gene	13761856	13763160	+	LOC_Os01g24410
chr01	13763048	13766071	BreakDancer:Pindel:DELLY:Lumpy	score=99;PE=15:SR=10;score=35:PE=15;SR=0:SU=4	mRNA	13761856	13763160	+	LOC_Os01g24410.1
chr01	13763048	13766071	BreakDancer:Pindel:DELLY:Lumpy	score=99;PE=15:SR=10;score=35:PE=15;SR=0:SU=4	exon	13762825	13763160	+	LOC_Os01g24410.1:exon_3
chr01	13763048	13766071	BreakDancer:Pindel:DELLY:Lumpy	score=99;PE=15:SR=10;score=35:PE=15;SR=0:SU=4	CDS	13762825	13763160	+	LOC_Os01g24410.1:cds_3
chr01	13763048	13766071	BreakDancer:Pindel:DELLY:Lumpy	score=99;PE=15:SR=10;score=35:PE=15;SR=0:SU=4	gene	13765231	13772186	+	LOC_Os01g24420
chr01	13763048	13766071	BreakDancer:Pindel:DELLY:Lumpy	score=99;PE=15:SR=10;score=35:PE=15;SR=0:SU=4	mRNA	13765231	13772186	+	LOC_Os01g24420.1
chr01	13763048	13766071	BreakDancer:Pindel:DELLY:Lumpy	score=99;PE=15:SR=10;score=35:PE=15;SR=0:SU=4	exon	13765231	13765357	+	LOC_Os01g24420.1:exon_1
chr01	13763048	13766071	BreakDancer:Pindel:DELLY:Lumpy	score=99;PE=15:SR=10;score=35:PE=15;SR=0:SU=4	CDS	13765231	13765357	+	LOC_Os01g24420.1:cds_1
chr01	13799424	13799623	BreakDancer:DELLY:SVseq2	score=99;PE=8:PE=0;SR=4:SR=4	gene	13794686	13799906	+	LOC_Os01g24470
chr01	13799424	13799623	BreakDancer:DELLY:SVseq2	score=99;PE=8:PE=0;SR=4:SR=4	mRNA	13794686	13799906	+	LOC_Os01g24470.1
chr01	13799424	13799623	BreakDancer:DELLY:SVseq2	score=99;PE=8:PE=0;SR=4:SR=4	exon	13798928	13799906	+	LOC_Os01g24470.1:exon_10
chr01	13799424	13799623	BreakDancer:DELLY:SVseq2	score=99;PE=8:PE=0;SR=4:SR=4	three_prime_UTR	13799283	13799906	+	LOC_Os01g24470.1:utr_2
chr01	13799424	13799623	BreakDancer:DELLY:SVseq2	score=99;PE=8:PE=0;SR=4:SR=4	mRNA	13794782	13799891	+	LOC_Os01g24470.2
chr01	13799424	13799623	BreakDancer:DELLY:SVseq2	score=99;PE=8:PE=0;SR=4:SR=4	exon	13798928	13799891	+	LOC_Os01g24470.2:exon_9
chr01	13799424	13799623	BreakDancer:DELLY:SVseq2	score=99;PE=8:PE=0;SR=4:SR=4	three_prime_UTR	13799283	13799891	+	LOC_Os01g24470.2:utr_5
chr01	13852024	13852375	BreakDancer:DELLY:SVseq2	score=99;PE=13:PE=16;SR=0:SR=4	NA	NA	NA	NA	NA
chr01	13927702	13927925	BreakDancer:Pindel:SVseq2	score=99;PE=7:SR=7;score=14:SR=3	NA	NA	NA	NA	NA
chr01	14009363	14009656	BreakDancer:DELLY:SVseq2	score=99;PE=10:PE=11;SR=0:SR=3	NA	NA	NA	NA	NA
chr01	14143800	14144207	BreakDancer:Pindel:DELLY	score=99;PE=6:SR=7;score=14:PE=6;SR=0	NA	NA	NA	NA	NA
chr01	14160144	14163313	BreakDancer:Pindel:DELLY:SVseq2:Lumpy	score=99;PE=32:SR=8;score=24:PE=29;SR=0:SR=3:SU=5	gene	14163295	14165284	-	LOC_Os01g25090
chr01	14160144	14163313	BreakDancer:Pindel:DELLY:SVseq2:Lumpy	score=99;PE=32:SR=8;score=24:PE=29;SR=0:SR=3:SU=5	mRNA	14163295	14165284	-	LOC_Os01g25090.1
chr01	14160144	14163313	BreakDancer:Pindel:DELLY:SVseq2:Lumpy	score=99;PE=32:SR=8;score=24:PE=29;SR=0:SR=3:SU=5	exon	14163295	14163651	-	LOC_Os01g25090.1:exon_2
chr01	14160144	14163313	BreakDancer:Pindel:DELLY:SVseq2:Lumpy	score=99;PE=32:SR=8;score=24:PE=29;SR=0:SR=3:SU=5	CDS	14163295	14163651	-	LOC_Os01g25090.1:cds_2
chr01	14177844	14189349	BreakDancer:Pindel:DELLY:SVseq2:Lumpy	score=99;PE=16:SR=18;score=91:PE=15;SR=6:SR=5:SU=4	gene	14178468	14182168	-	LOC_Os01g25120
chr01	14177844	14189349	BreakDancer:Pindel:DELLY:SVseq2:Lumpy	score=99;PE=16:SR=18;score=91:PE=15;SR=6:SR=5:SU=4	mRNA	14178468	14182168	-	LOC_Os01g25120.1
chr01	14177844	14189349	BreakDancer:Pindel:DELLY:SVseq2:Lumpy	score=99;PE=16:SR=18;score=91:PE=15;SR=6:SR=5:SU=4	exon	14181498	14182168	-	LOC_Os01g25120.1:exon_1
chr01	14177844	14189349	BreakDancer:Pindel:DELLY:SVseq2:Lumpy	score=99;PE=16:SR=18;score=91:PE=15;SR=6:SR=5:SU=4	exon	14180867	14181419	-	LOC_Os01g25120.1:exon_2
chr01	14177844	14189349	BreakDancer:Pindel:DELLY:SVseq2:Lumpy	score=99;PE=16:SR=18;score=91:PE=15;SR=6:SR=5:SU=4	exon	14179573	14180672	-	LOC_Os01g25120.1:exon_3
chr01	14177844	14189349	BreakDancer:Pindel:DELLY:SVseq2:Lumpy	score=99;PE=16:SR=18;score=91:PE=15;SR=6:SR=5:SU=4	exon	14179290	14179463	-	LOC_Os01g25120.1:exon_4
chr01	14177844	14189349	BreakDancer:Pindel:DELLY:SVseq2:Lumpy	score=99;PE=16:SR=18;score=91:PE=15;SR=6:SR=5:SU=4	exon	14179083	14179193	-	LOC_Os01g25120.1:exon_5
chr01	14177844	14189349	BreakDancer:Pindel:DELLY:SVseq2:Lumpy	score=99;PE=16:SR=18;score=91:PE=15;SR=6:SR=5:SU=4	exon	14178926	14178998	-	LOC_Os01g25120.1:exon_6
chr01	14177844	14189349	BreakDancer:Pindel:DELLY:SVseq2:Lumpy	score=99;PE=16:SR=18;score=91:PE=15;SR=6:SR=5:SU=4	exon	14178733	14178831	-	LOC_Os01g25120.1:exon_7
chr01	14177844	14189349	BreakDancer:Pindel:DELLY:SVseq2:Lumpy	score=99;PE=16:SR=18;score=91:PE=15;SR=6:SR=5:SU=4	exon	14178468	14178653	-	LOC_Os01g25120.1:exon_8
chr01	14177844	14189349	BreakDancer:Pindel:DELLY:SVseq2:Lumpy	score=99;PE=16:SR=18;score=91:PE=15;SR=6:SR=5:SU=4	CDS	14181498	14182168	-	LOC_Os01g25120.1:cds_1
chr01	14177844	14189349	BreakDancer:Pindel:DELLY:SVseq2:Lumpy	score=99;PE=16:SR=18;score=91:PE=15;SR=6:SR=5:SU=4	CDS	14180867	14181419	-	LOC_Os01g25120.1:cds_2
chr01	14177844	14189349	BreakDancer:Pindel:DELLY:SVseq2:Lumpy	score=99;PE=16:SR=18;score=91:PE=15;SR=6:SR=5:SU=4	CDS	14179573	14180672	-	LOC_Os01g25120.1:cds_3
chr01	14177844	14189349	BreakDancer:Pindel:DELLY:SVseq2:Lumpy	score=99;PE=16:SR=18;score=91:PE=15;SR=6:SR=5:SU=4	CDS	14179290	14179463	-	LOC_Os01g25120.1:cds_4
chr01	14177844	14189349	BreakDancer:Pindel:DELLY:SVseq2:Lumpy	score=99;PE=16:SR=18;score=91:PE=15;SR=6:SR=5:SU=4	CDS	14179083	14179193	-	LOC_Os01g25120.1:cds_5
chr01	14177844	14189349	BreakDancer:Pindel:DELLY:SVseq2:Lumpy	score=99;PE=16:SR=18;score=91:PE=15;SR=6:SR=5:SU=4	CDS	14178926	14178998	-	LOC_Os01g25120.1:cds_6
chr01	14177844	14189349	BreakDancer:Pindel:DELLY:SVseq2:Lumpy	score=99;PE=16:SR=18;score=91:PE=15;SR=6:SR=5:SU=4	CDS	14178733	14178831	-	LOC_Os01g25120.1:cds_7
chr01	14177844	14189349	BreakDancer:Pindel:DELLY:SVseq2:Lumpy	score=99;PE=16:SR=18;score=91:PE=15;SR=6:SR=5:SU=4	CDS	14178468	14178653	-	LOC_Os01g25120.1:cds_8
chr01	14177844	14189349	BreakDancer:Pindel:DELLY:SVseq2:Lumpy	score=99;PE=16:SR=18;score=91:PE=15;SR=6:SR=5:SU=4	gene	14183341	14183751	-	LOC_Os01g25130
chr01	14177844	14189349	BreakDancer:Pindel:DELLY:SVseq2:Lumpy	score=99;PE=16:SR=18;score=91:PE=15;SR=6:SR=5:SU=4	mRNA	14183341	14183751	-	LOC_Os01g25130.1
chr01	14177844	14189349	BreakDancer:Pindel:DELLY:SVseq2:Lumpy	score=99;PE=16:SR=18;score=91:PE=15;SR=6:SR=5:SU=4	exon	14183341	14183751	-	LOC_Os01g25130.1:exon_1
chr01	14177844	14189349	BreakDancer:Pindel:DELLY:SVseq2:Lumpy	score=99;PE=16:SR=18;score=91:PE=15;SR=6:SR=5:SU=4	CDS	14183341	14183751	-	LOC_Os01g25130.1:cds_1
chr01	14177844	14189349	BreakDancer:Pindel:DELLY:SVseq2:Lumpy	score=99;PE=16:SR=18;score=91:PE=15;SR=6:SR=5:SU=4	gene	14185161	14188466	-	LOC_Os01g25140
chr01	14177844	14189349	BreakDancer:Pindel:DELLY:SVseq2:Lumpy	score=99;PE=16:SR=18;score=91:PE=15;SR=6:SR=5:SU=4	mRNA	14185161	14188466	-	LOC_Os01g25140.1
chr01	14177844	14189349	BreakDancer:Pindel:DELLY:SVseq2:Lumpy	score=99;PE=16:SR=18;score=91:PE=15;SR=6:SR=5:SU=4	exon	14185161	14188466	-	LOC_Os01g25140.1:exon_1
chr01	14177844	14189349	BreakDancer:Pindel:DELLY:SVseq2:Lumpy	score=99;PE=16:SR=18;score=91:PE=15;SR=6:SR=5:SU=4	CDS	14185161	14188466	-	LOC_Os01g25140.1:cds_1
chr01	14205875	14208910	BreakDancer:Pindel:DELLY:CNVnator:SVseq2	score=83;PE=4:SR=6;score=12:PE=6;SR=6:eval1=0.0809444;eval2=1.37324e-05;eval3=4032.61;eval4=5369.31:SR=4	NA	NA	NA	NA	NA
chr01	14224458	14232011	BreakDancer:Pindel:DELLY:CNVnator:Lumpy	score=99;PE=18:SR=5;score=12:PE=16;SR=0:eval1=2.12497e-11;eval2=3.39384e-79;eval3=2.79601e-11;eval4=1.48518e-74:SU=5	gene	14224896	14233656	-	LOC_Os01g25189
chr01	14224458	14232011	BreakDancer:Pindel:DELLY:CNVnator:Lumpy	score=99;PE=18:SR=5;score=12:PE=16;SR=0:eval1=2.12497e-11;eval2=3.39384e-79;eval3=2.79601e-11;eval4=1.48518e-74:SU=5	mRNA	14225415	14233656	-	LOC_Os01g25189.6
chr01	14224458	14232011	BreakDancer:Pindel:DELLY:CNVnator:Lumpy	score=99;PE=18:SR=5;score=12:PE=16;SR=0:eval1=2.12497e-11;eval2=3.39384e-79;eval3=2.79601e-11;eval4=1.48518e-74:SU=5	mRNA	14224896	14233656	-	LOC_Os01g25189.1
chr01	14224458	14232011	BreakDancer:Pindel:DELLY:CNVnator:Lumpy	score=99;PE=18:SR=5;score=12:PE=16;SR=0:eval1=2.12497e-11;eval2=3.39384e-79;eval3=2.79601e-11;eval4=1.48518e-74:SU=5	exon	14228497	14228614	-	LOC_Os01g25189.6:exon_5
chr01	14224458	14232011	BreakDancer:Pindel:DELLY:CNVnator:Lumpy	score=99;PE=18:SR=5;score=12:PE=16;SR=0:eval1=2.12497e-11;eval2=3.39384e-79;eval3=2.79601e-11;eval4=1.48518e-74:SU=5	exon	14228695	14228790	-	LOC_Os01g25189.1:exon_4
chr01	14224458	14232011	BreakDancer:Pindel:DELLY:CNVnator:Lumpy	score=99;PE=18:SR=5;score=12:PE=16;SR=0:eval1=2.12497e-11;eval2=3.39384e-79;eval3=2.79601e-11;eval4=1.48518e-74:SU=5	exon	14228497	14228614	-	LOC_Os01g25189.1:exon_5
chr01	14224458	14232011	BreakDancer:Pindel:DELLY:CNVnator:Lumpy	score=99;PE=18:SR=5;score=12:PE=16;SR=0:eval1=2.12497e-11;eval2=3.39384e-79;eval3=2.79601e-11;eval4=1.48518e-74:SU=5	exon	14228324	14228394	-	LOC_Os01g25189.1:exon_6
chr01	14224458	14232011	BreakDancer:Pindel:DELLY:CNVnator:Lumpy	score=99;PE=18:SR=5;score=12:PE=16;SR=0:eval1=2.12497e-11;eval2=3.39384e-79;eval3=2.79601e-11;eval4=1.48518e-74:SU=5	exon	14228122	14228178	-	LOC_Os01g25189.1:exon_7
chr01	14224458	14232011	BreakDancer:Pindel:DELLY:CNVnator:Lumpy	score=99;PE=18:SR=5;score=12:PE=16;SR=0:eval1=2.12497e-11;eval2=3.39384e-79;eval3=2.79601e-11;eval4=1.48518e-74:SU=5	exon	14227599	14227690	-	LOC_Os01g25189.1:exon_8
chr01	14224458	14232011	BreakDancer:Pindel:DELLY:CNVnator:Lumpy	score=99;PE=18:SR=5;score=12:PE=16;SR=0:eval1=2.12497e-11;eval2=3.39384e-79;eval3=2.79601e-11;eval4=1.48518e-74:SU=5	exon	14227309	14227356	-	LOC_Os01g25189.1:exon_9
chr01	14224458	14232011	BreakDancer:Pindel:DELLY:CNVnator:Lumpy	score=99;PE=18:SR=5;score=12:PE=16;SR=0:eval1=2.12497e-11;eval2=3.39384e-79;eval3=2.79601e-11;eval4=1.48518e-74:SU=5	exon	14226682	14226802	-	LOC_Os01g25189.1:exon_10
chr01	14224458	14232011	BreakDancer:Pindel:DELLY:CNVnator:Lumpy	score=99;PE=18:SR=5;score=12:PE=16;SR=0:eval1=2.12497e-11;eval2=3.39384e-79;eval3=2.79601e-11;eval4=1.48518e-74:SU=5	exon	14226560	14226606	-	LOC_Os01g25189.1:exon_11
chr01	14224458	14232011	BreakDancer:Pindel:DELLY:CNVnator:Lumpy	score=99;PE=18:SR=5;score=12:PE=16;SR=0:eval1=2.12497e-11;eval2=3.39384e-79;eval3=2.79601e-11;eval4=1.48518e-74:SU=5	exon	14226325	14226406	-	LOC_Os01g25189.1:exon_12
chr01	14224458	14232011	BreakDancer:Pindel:DELLY:CNVnator:Lumpy	score=99;PE=18:SR=5;score=12:PE=16;SR=0:eval1=2.12497e-11;eval2=3.39384e-79;eval3=2.79601e-11;eval4=1.48518e-74:SU=5	exon	14226026	14226102	-	LOC_Os01g25189.1:exon_13
chr01	14224458	14232011	BreakDancer:Pindel:DELLY:CNVnator:Lumpy	score=99;PE=18:SR=5;score=12:PE=16;SR=0:eval1=2.12497e-11;eval2=3.39384e-79;eval3=2.79601e-11;eval4=1.48518e-74:SU=5	exon	14225803	14225922	-	LOC_Os01g25189.1:exon_14
chr01	14224458	14232011	BreakDancer:Pindel:DELLY:CNVnator:Lumpy	score=99;PE=18:SR=5;score=12:PE=16;SR=0:eval1=2.12497e-11;eval2=3.39384e-79;eval3=2.79601e-11;eval4=1.48518e-74:SU=5	exon	14225253	14225327	-	LOC_Os01g25189.1:exon_15
chr01	14224458	14232011	BreakDancer:Pindel:DELLY:CNVnator:Lumpy	score=99;PE=18:SR=5;score=12:PE=16;SR=0:eval1=2.12497e-11;eval2=3.39384e-79;eval3=2.79601e-11;eval4=1.48518e-74:SU=5	exon	14224896	14225173	-	LOC_Os01g25189.1:exon_16
chr01	14224458	14232011	BreakDancer:Pindel:DELLY:CNVnator:Lumpy	score=99;PE=18:SR=5;score=12:PE=16;SR=0:eval1=2.12497e-11;eval2=3.39384e-79;eval3=2.79601e-11;eval4=1.48518e-74:SU=5	five_prime_UTR	14228743	14228790	-	LOC_Os01g25189.1:utr_2
chr01	14224458	14232011	BreakDancer:Pindel:DELLY:CNVnator:Lumpy	score=99;PE=18:SR=5;score=12:PE=16;SR=0:eval1=2.12497e-11;eval2=3.39384e-79;eval3=2.79601e-11;eval4=1.48518e-74:SU=5	CDS	14228695	14228742	-	LOC_Os01g25189.1:cds_1
chr01	14224458	14232011	BreakDancer:Pindel:DELLY:CNVnator:Lumpy	score=99;PE=18:SR=5;score=12:PE=16;SR=0:eval1=2.12497e-11;eval2=3.39384e-79;eval3=2.79601e-11;eval4=1.48518e-74:SU=5	CDS	14228497	14228614	-	LOC_Os01g25189.1:cds_2
chr01	14224458	14232011	BreakDancer:Pindel:DELLY:CNVnator:Lumpy	score=99;PE=18:SR=5;score=12:PE=16;SR=0:eval1=2.12497e-11;eval2=3.39384e-79;eval3=2.79601e-11;eval4=1.48518e-74:SU=5	CDS	14228324	14228394	-	LOC_Os01g25189.1:cds_3
chr01	14224458	14232011	BreakDancer:Pindel:DELLY:CNVnator:Lumpy	score=99;PE=18:SR=5;score=12:PE=16;SR=0:eval1=2.12497e-11;eval2=3.39384e-79;eval3=2.79601e-11;eval4=1.48518e-74:SU=5	CDS	14228122	14228178	-	LOC_Os01g25189.1:cds_4
chr01	14224458	14232011	BreakDancer:Pindel:DELLY:CNVnator:Lumpy	score=99;PE=18:SR=5;score=12:PE=16;SR=0:eval1=2.12497e-11;eval2=3.39384e-79;eval3=2.79601e-11;eval4=1.48518e-74:SU=5	CDS	14227599	14227690	-	LOC_Os01g25189.1:cds_5
chr01	14224458	14232011	BreakDancer:Pindel:DELLY:CNVnator:Lumpy	score=99;PE=18:SR=5;score=12:PE=16;SR=0:eval1=2.12497e-11;eval2=3.39384e-79;eval3=2.79601e-11;eval4=1.48518e-74:SU=5	CDS	14227309	14227356	-	LOC_Os01g25189.1:cds_6
chr01	14224458	14232011	BreakDancer:Pindel:DELLY:CNVnator:Lumpy	score=99;PE=18:SR=5;score=12:PE=16;SR=0:eval1=2.12497e-11;eval2=3.39384e-79;eval3=2.79601e-11;eval4=1.48518e-74:SU=5	CDS	14226682	14226802	-	LOC_Os01g25189.1:cds_7
chr01	14224458	14232011	BreakDancer:Pindel:DELLY:CNVnator:Lumpy	score=99;PE=18:SR=5;score=12:PE=16;SR=0:eval1=2.12497e-11;eval2=3.39384e-79;eval3=2.79601e-11;eval4=1.48518e-74:SU=5	CDS	14226560	14226606	-	LOC_Os01g25189.1:cds_8
chr01	14224458	14232011	BreakDancer:Pindel:DELLY:CNVnator:Lumpy	score=99;PE=18:SR=5;score=12:PE=16;SR=0:eval1=2.12497e-11;eval2=3.39384e-79;eval3=2.79601e-11;eval4=1.48518e-74:SU=5	CDS	14226325	14226406	-	LOC_Os01g25189.1:cds_9
chr01	14224458	14232011	BreakDancer:Pindel:DELLY:CNVnator:Lumpy	score=99;PE=18:SR=5;score=12:PE=16;SR=0:eval1=2.12497e-11;eval2=3.39384e-79;eval3=2.79601e-11;eval4=1.48518e-74:SU=5	CDS	14226026	14226102	-	LOC_Os01g25189.1:cds_10
chr01	14224458	14232011	BreakDancer:Pindel:DELLY:CNVnator:Lumpy	score=99;PE=18:SR=5;score=12:PE=16;SR=0:eval1=2.12497e-11;eval2=3.39384e-79;eval3=2.79601e-11;eval4=1.48518e-74:SU=5	CDS	14225803	14225922	-	LOC_Os01g25189.1:cds_11
chr01	14224458	14232011	BreakDancer:Pindel:DELLY:CNVnator:Lumpy	score=99;PE=18:SR=5;score=12:PE=16;SR=0:eval1=2.12497e-11;eval2=3.39384e-79;eval3=2.79601e-11;eval4=1.48518e-74:SU=5	CDS	14225253	14225327	-	LOC_Os01g25189.1:cds_12
chr01	14224458	14232011	BreakDancer:Pindel:DELLY:CNVnator:Lumpy	score=99;PE=18:SR=5;score=12:PE=16;SR=0:eval1=2.12497e-11;eval2=3.39384e-79;eval3=2.79601e-11;eval4=1.48518e-74:SU=5	CDS	14225020	14225173	-	LOC_Os01g25189.1:cds_13
chr01	14224458	14232011	BreakDancer:Pindel:DELLY:CNVnator:Lumpy	score=99;PE=18:SR=5;score=12:PE=16;SR=0:eval1=2.12497e-11;eval2=3.39384e-79;eval3=2.79601e-11;eval4=1.48518e-74:SU=5	three_prime_UTR	14224896	14225019	-	LOC_Os01g25189.1:utr_1
chr01	14224458	14232011	BreakDancer:Pindel:DELLY:CNVnator:Lumpy	score=99;PE=18:SR=5;score=12:PE=16;SR=0:eval1=2.12497e-11;eval2=3.39384e-79;eval3=2.79601e-11;eval4=1.48518e-74:SU=5	mRNA	14224904	14233645	-	LOC_Os01g25189.2
chr01	14224458	14232011	BreakDancer:Pindel:DELLY:CNVnator:Lumpy	score=99;PE=18:SR=5;score=12:PE=16;SR=0:eval1=2.12497e-11;eval2=3.39384e-79;eval3=2.79601e-11;eval4=1.48518e-74:SU=5	exon	14225803	14225922	-	LOC_Os01g25189.4:exon_11
chr01	14224458	14232011	BreakDancer:Pindel:DELLY:CNVnator:Lumpy	score=99;PE=18:SR=5;score=12:PE=16;SR=0:eval1=2.12497e-11;eval2=3.39384e-79;eval3=2.79601e-11;eval4=1.48518e-74:SU=5	exon	14228695	14228790	-	LOC_Os01g25189.2:exon_3
chr01	14224458	14232011	BreakDancer:Pindel:DELLY:CNVnator:Lumpy	score=99;PE=18:SR=5;score=12:PE=16;SR=0:eval1=2.12497e-11;eval2=3.39384e-79;eval3=2.79601e-11;eval4=1.48518e-74:SU=5	exon	14228497	14228614	-	LOC_Os01g25189.2:exon_4
chr01	14224458	14232011	BreakDancer:Pindel:DELLY:CNVnator:Lumpy	score=99;PE=18:SR=5;score=12:PE=16;SR=0:eval1=2.12497e-11;eval2=3.39384e-79;eval3=2.79601e-11;eval4=1.48518e-74:SU=5	exon	14228324	14228394	-	LOC_Os01g25189.2:exon_5
chr01	14224458	14232011	BreakDancer:Pindel:DELLY:CNVnator:Lumpy	score=99;PE=18:SR=5;score=12:PE=16;SR=0:eval1=2.12497e-11;eval2=3.39384e-79;eval3=2.79601e-11;eval4=1.48518e-74:SU=5	exon	14228122	14228178	-	LOC_Os01g25189.2:exon_6
chr01	14224458	14232011	BreakDancer:Pindel:DELLY:CNVnator:Lumpy	score=99;PE=18:SR=5;score=12:PE=16;SR=0:eval1=2.12497e-11;eval2=3.39384e-79;eval3=2.79601e-11;eval4=1.48518e-74:SU=5	exon	14227599	14227690	-	LOC_Os01g25189.2:exon_7
chr01	14224458	14232011	BreakDancer:Pindel:DELLY:CNVnator:Lumpy	score=99;PE=18:SR=5;score=12:PE=16;SR=0:eval1=2.12497e-11;eval2=3.39384e-79;eval3=2.79601e-11;eval4=1.48518e-74:SU=5	exon	14227309	14227356	-	LOC_Os01g25189.2:exon_8
chr01	14224458	14232011	BreakDancer:Pindel:DELLY:CNVnator:Lumpy	score=99;PE=18:SR=5;score=12:PE=16;SR=0:eval1=2.12497e-11;eval2=3.39384e-79;eval3=2.79601e-11;eval4=1.48518e-74:SU=5	exon	14226682	14226802	-	LOC_Os01g25189.2:exon_9
chr01	14224458	14232011	BreakDancer:Pindel:DELLY:CNVnator:Lumpy	score=99;PE=18:SR=5;score=12:PE=16;SR=0:eval1=2.12497e-11;eval2=3.39384e-79;eval3=2.79601e-11;eval4=1.48518e-74:SU=5	exon	14226560	14226606	-	LOC_Os01g25189.2:exon_10
chr01	14224458	14232011	BreakDancer:Pindel:DELLY:CNVnator:Lumpy	score=99;PE=18:SR=5;score=12:PE=16;SR=0:eval1=2.12497e-11;eval2=3.39384e-79;eval3=2.79601e-11;eval4=1.48518e-74:SU=5	exon	14226325	14226406	-	LOC_Os01g25189.2:exon_11
chr01	14224458	14232011	BreakDancer:Pindel:DELLY:CNVnator:Lumpy	score=99;PE=18:SR=5;score=12:PE=16;SR=0:eval1=2.12497e-11;eval2=3.39384e-79;eval3=2.79601e-11;eval4=1.48518e-74:SU=5	exon	14226026	14226102	-	LOC_Os01g25189.2:exon_12
chr01	14224458	14232011	BreakDancer:Pindel:DELLY:CNVnator:Lumpy	score=99;PE=18:SR=5;score=12:PE=16;SR=0:eval1=2.12497e-11;eval2=3.39384e-79;eval3=2.79601e-11;eval4=1.48518e-74:SU=5	exon	14225803	14225922	-	LOC_Os01g25189.2:exon_13
chr01	14224458	14232011	BreakDancer:Pindel:DELLY:CNVnator:Lumpy	score=99;PE=18:SR=5;score=12:PE=16;SR=0:eval1=2.12497e-11;eval2=3.39384e-79;eval3=2.79601e-11;eval4=1.48518e-74:SU=5	exon	14225253	14225327	-	LOC_Os01g25189.2:exon_14
chr01	14224458	14232011	BreakDancer:Pindel:DELLY:CNVnator:Lumpy	score=99;PE=18:SR=5;score=12:PE=16;SR=0:eval1=2.12497e-11;eval2=3.39384e-79;eval3=2.79601e-11;eval4=1.48518e-74:SU=5	exon	14224904	14225178	-	LOC_Os01g25189.2:exon_15
chr01	14224458	14232011	BreakDancer:Pindel:DELLY:CNVnator:Lumpy	score=99;PE=18:SR=5;score=12:PE=16;SR=0:eval1=2.12497e-11;eval2=3.39384e-79;eval3=2.79601e-11;eval4=1.48518e-74:SU=5	five_prime_UTR	14228743	14228790	-	LOC_Os01g25189.2:utr_2
chr01	14224458	14232011	BreakDancer:Pindel:DELLY:CNVnator:Lumpy	score=99;PE=18:SR=5;score=12:PE=16;SR=0:eval1=2.12497e-11;eval2=3.39384e-79;eval3=2.79601e-11;eval4=1.48518e-74:SU=5	CDS	14228695	14228742	-	LOC_Os01g25189.2:cds_1
chr01	14224458	14232011	BreakDancer:Pindel:DELLY:CNVnator:Lumpy	score=99;PE=18:SR=5;score=12:PE=16;SR=0:eval1=2.12497e-11;eval2=3.39384e-79;eval3=2.79601e-11;eval4=1.48518e-74:SU=5	CDS	14228497	14228614	-	LOC_Os01g25189.2:cds_2
chr01	14224458	14232011	BreakDancer:Pindel:DELLY:CNVnator:Lumpy	score=99;PE=18:SR=5;score=12:PE=16;SR=0:eval1=2.12497e-11;eval2=3.39384e-79;eval3=2.79601e-11;eval4=1.48518e-74:SU=5	CDS	14228324	14228394	-	LOC_Os01g25189.2:cds_3
chr01	14224458	14232011	BreakDancer:Pindel:DELLY:CNVnator:Lumpy	score=99;PE=18:SR=5;score=12:PE=16;SR=0:eval1=2.12497e-11;eval2=3.39384e-79;eval3=2.79601e-11;eval4=1.48518e-74:SU=5	CDS	14228122	14228178	-	LOC_Os01g25189.2:cds_4
chr01	14224458	14232011	BreakDancer:Pindel:DELLY:CNVnator:Lumpy	score=99;PE=18:SR=5;score=12:PE=16;SR=0:eval1=2.12497e-11;eval2=3.39384e-79;eval3=2.79601e-11;eval4=1.48518e-74:SU=5	CDS	14227599	14227690	-	LOC_Os01g25189.2:cds_5
chr01	14224458	14232011	BreakDancer:Pindel:DELLY:CNVnator:Lumpy	score=99;PE=18:SR=5;score=12:PE=16;SR=0:eval1=2.12497e-11;eval2=3.39384e-79;eval3=2.79601e-11;eval4=1.48518e-74:SU=5	CDS	14227309	14227356	-	LOC_Os01g25189.2:cds_6
chr01	14224458	14232011	BreakDancer:Pindel:DELLY:CNVnator:Lumpy	score=99;PE=18:SR=5;score=12:PE=16;SR=0:eval1=2.12497e-11;eval2=3.39384e-79;eval3=2.79601e-11;eval4=1.48518e-74:SU=5	CDS	14226682	14226802	-	LOC_Os01g25189.2:cds_7
chr01	14224458	14232011	BreakDancer:Pindel:DELLY:CNVnator:Lumpy	score=99;PE=18:SR=5;score=12:PE=16;SR=0:eval1=2.12497e-11;eval2=3.39384e-79;eval3=2.79601e-11;eval4=1.48518e-74:SU=5	CDS	14226560	14226606	-	LOC_Os01g25189.2:cds_8
chr01	14224458	14232011	BreakDancer:Pindel:DELLY:CNVnator:Lumpy	score=99;PE=18:SR=5;score=12:PE=16;SR=0:eval1=2.12497e-11;eval2=3.39384e-79;eval3=2.79601e-11;eval4=1.48518e-74:SU=5	CDS	14226325	14226406	-	LOC_Os01g25189.2:cds_9
chr01	14224458	14232011	BreakDancer:Pindel:DELLY:CNVnator:Lumpy	score=99;PE=18:SR=5;score=12:PE=16;SR=0:eval1=2.12497e-11;eval2=3.39384e-79;eval3=2.79601e-11;eval4=1.48518e-74:SU=5	CDS	14226026	14226102	-	LOC_Os01g25189.2:cds_10
chr01	14224458	14232011	BreakDancer:Pindel:DELLY:CNVnator:Lumpy	score=99;PE=18:SR=5;score=12:PE=16;SR=0:eval1=2.12497e-11;eval2=3.39384e-79;eval3=2.79601e-11;eval4=1.48518e-74:SU=5	CDS	14225803	14225922	-	LOC_Os01g25189.2:cds_11
chr01	14224458	14232011	BreakDancer:Pindel:DELLY:CNVnator:Lumpy	score=99;PE=18:SR=5;score=12:PE=16;SR=0:eval1=2.12497e-11;eval2=3.39384e-79;eval3=2.79601e-11;eval4=1.48518e-74:SU=5	CDS	14225253	14225327	-	LOC_Os01g25189.2:cds_12
chr01	14224458	14232011	BreakDancer:Pindel:DELLY:CNVnator:Lumpy	score=99;PE=18:SR=5;score=12:PE=16;SR=0:eval1=2.12497e-11;eval2=3.39384e-79;eval3=2.79601e-11;eval4=1.48518e-74:SU=5	CDS	14225166	14225178	-	LOC_Os01g25189.2:cds_13
chr01	14224458	14232011	BreakDancer:Pindel:DELLY:CNVnator:Lumpy	score=99;PE=18:SR=5;score=12:PE=16;SR=0:eval1=2.12497e-11;eval2=3.39384e-79;eval3=2.79601e-11;eval4=1.48518e-74:SU=5	three_prime_UTR	14224904	14225165	-	LOC_Os01g25189.2:utr_1
chr01	14224458	14232011	BreakDancer:Pindel:DELLY:CNVnator:Lumpy	score=99;PE=18:SR=5;score=12:PE=16;SR=0:eval1=2.12497e-11;eval2=3.39384e-79;eval3=2.79601e-11;eval4=1.48518e-74:SU=5	mRNA	14224896	14228818	-	LOC_Os01g25189.4
chr01	14224458	14232011	BreakDancer:Pindel:DELLY:CNVnator:Lumpy	score=99;PE=18:SR=5;score=12:PE=16;SR=0:eval1=2.12497e-11;eval2=3.39384e-79;eval3=2.79601e-11;eval4=1.48518e-74:SU=5	exon	14228695	14228818	-	LOC_Os01g25189.4:exon_1
chr01	14224458	14232011	BreakDancer:Pindel:DELLY:CNVnator:Lumpy	score=99;PE=18:SR=5;score=12:PE=16;SR=0:eval1=2.12497e-11;eval2=3.39384e-79;eval3=2.79601e-11;eval4=1.48518e-74:SU=5	exon	14228497	14228614	-	LOC_Os01g25189.4:exon_2
chr01	14224458	14232011	BreakDancer:Pindel:DELLY:CNVnator:Lumpy	score=99;PE=18:SR=5;score=12:PE=16;SR=0:eval1=2.12497e-11;eval2=3.39384e-79;eval3=2.79601e-11;eval4=1.48518e-74:SU=5	exon	14228324	14228394	-	LOC_Os01g25189.4:exon_3
chr01	14224458	14232011	BreakDancer:Pindel:DELLY:CNVnator:Lumpy	score=99;PE=18:SR=5;score=12:PE=16;SR=0:eval1=2.12497e-11;eval2=3.39384e-79;eval3=2.79601e-11;eval4=1.48518e-74:SU=5	exon	14228122	14228178	-	LOC_Os01g25189.4:exon_4
chr01	14224458	14232011	BreakDancer:Pindel:DELLY:CNVnator:Lumpy	score=99;PE=18:SR=5;score=12:PE=16;SR=0:eval1=2.12497e-11;eval2=3.39384e-79;eval3=2.79601e-11;eval4=1.48518e-74:SU=5	exon	14227599	14227690	-	LOC_Os01g25189.4:exon_5
chr01	14224458	14232011	BreakDancer:Pindel:DELLY:CNVnator:Lumpy	score=99;PE=18:SR=5;score=12:PE=16;SR=0:eval1=2.12497e-11;eval2=3.39384e-79;eval3=2.79601e-11;eval4=1.48518e-74:SU=5	exon	14227309	14227356	-	LOC_Os01g25189.4:exon_6
chr01	14224458	14232011	BreakDancer:Pindel:DELLY:CNVnator:Lumpy	score=99;PE=18:SR=5;score=12:PE=16;SR=0:eval1=2.12497e-11;eval2=3.39384e-79;eval3=2.79601e-11;eval4=1.48518e-74:SU=5	exon	14226682	14226802	-	LOC_Os01g25189.4:exon_7
chr01	14224458	14232011	BreakDancer:Pindel:DELLY:CNVnator:Lumpy	score=99;PE=18:SR=5;score=12:PE=16;SR=0:eval1=2.12497e-11;eval2=3.39384e-79;eval3=2.79601e-11;eval4=1.48518e-74:SU=5	exon	14226560	14226606	-	LOC_Os01g25189.4:exon_8
chr01	14224458	14232011	BreakDancer:Pindel:DELLY:CNVnator:Lumpy	score=99;PE=18:SR=5;score=12:PE=16;SR=0:eval1=2.12497e-11;eval2=3.39384e-79;eval3=2.79601e-11;eval4=1.48518e-74:SU=5	exon	14226325	14226406	-	LOC_Os01g25189.4:exon_9
chr01	14224458	14232011	BreakDancer:Pindel:DELLY:CNVnator:Lumpy	score=99;PE=18:SR=5;score=12:PE=16;SR=0:eval1=2.12497e-11;eval2=3.39384e-79;eval3=2.79601e-11;eval4=1.48518e-74:SU=5	exon	14226026	14226102	-	LOC_Os01g25189.4:exon_10
chr01	14224458	14232011	BreakDancer:Pindel:DELLY:CNVnator:Lumpy	score=99;PE=18:SR=5;score=12:PE=16;SR=0:eval1=2.12497e-11;eval2=3.39384e-79;eval3=2.79601e-11;eval4=1.48518e-74:SU=5	CDS	14226682	14226802	-	LOC_Os01g25189.5:cds_7
chr01	14224458	14232011	BreakDancer:Pindel:DELLY:CNVnator:Lumpy	score=99;PE=18:SR=5;score=12:PE=16;SR=0:eval1=2.12497e-11;eval2=3.39384e-79;eval3=2.79601e-11;eval4=1.48518e-74:SU=5	exon	14225253	14225327	-	LOC_Os01g25189.4:exon_12
chr01	14224458	14232011	BreakDancer:Pindel:DELLY:CNVnator:Lumpy	score=99;PE=18:SR=5;score=12:PE=16;SR=0:eval1=2.12497e-11;eval2=3.39384e-79;eval3=2.79601e-11;eval4=1.48518e-74:SU=5	exon	14224896	14225173	-	LOC_Os01g25189.4:exon_13
chr01	14224458	14232011	BreakDancer:Pindel:DELLY:CNVnator:Lumpy	score=99;PE=18:SR=5;score=12:PE=16;SR=0:eval1=2.12497e-11;eval2=3.39384e-79;eval3=2.79601e-11;eval4=1.48518e-74:SU=5	five_prime_UTR	14228743	14228818	-	LOC_Os01g25189.4:utr_2
chr01	14224458	14232011	BreakDancer:Pindel:DELLY:CNVnator:Lumpy	score=99;PE=18:SR=5;score=12:PE=16;SR=0:eval1=2.12497e-11;eval2=3.39384e-79;eval3=2.79601e-11;eval4=1.48518e-74:SU=5	CDS	14228695	14228742	-	LOC_Os01g25189.4:cds_1
chr01	14224458	14232011	BreakDancer:Pindel:DELLY:CNVnator:Lumpy	score=99;PE=18:SR=5;score=12:PE=16;SR=0:eval1=2.12497e-11;eval2=3.39384e-79;eval3=2.79601e-11;eval4=1.48518e-74:SU=5	CDS	14228497	14228614	-	LOC_Os01g25189.4:cds_2
chr01	14224458	14232011	BreakDancer:Pindel:DELLY:CNVnator:Lumpy	score=99;PE=18:SR=5;score=12:PE=16;SR=0:eval1=2.12497e-11;eval2=3.39384e-79;eval3=2.79601e-11;eval4=1.48518e-74:SU=5	CDS	14228324	14228394	-	LOC_Os01g25189.4:cds_3
chr01	14224458	14232011	BreakDancer:Pindel:DELLY:CNVnator:Lumpy	score=99;PE=18:SR=5;score=12:PE=16;SR=0:eval1=2.12497e-11;eval2=3.39384e-79;eval3=2.79601e-11;eval4=1.48518e-74:SU=5	CDS	14228122	14228178	-	LOC_Os01g25189.4:cds_4
chr01	14224458	14232011	BreakDancer:Pindel:DELLY:CNVnator:Lumpy	score=99;PE=18:SR=5;score=12:PE=16;SR=0:eval1=2.12497e-11;eval2=3.39384e-79;eval3=2.79601e-11;eval4=1.48518e-74:SU=5	CDS	14227599	14227690	-	LOC_Os01g25189.4:cds_5
chr01	14224458	14232011	BreakDancer:Pindel:DELLY:CNVnator:Lumpy	score=99;PE=18:SR=5;score=12:PE=16;SR=0:eval1=2.12497e-11;eval2=3.39384e-79;eval3=2.79601e-11;eval4=1.48518e-74:SU=5	CDS	14227309	14227356	-	LOC_Os01g25189.4:cds_6
chr01	14224458	14232011	BreakDancer:Pindel:DELLY:CNVnator:Lumpy	score=99;PE=18:SR=5;score=12:PE=16;SR=0:eval1=2.12497e-11;eval2=3.39384e-79;eval3=2.79601e-11;eval4=1.48518e-74:SU=5	CDS	14226682	14226802	-	LOC_Os01g25189.4:cds_7
chr01	14224458	14232011	BreakDancer:Pindel:DELLY:CNVnator:Lumpy	score=99;PE=18:SR=5;score=12:PE=16;SR=0:eval1=2.12497e-11;eval2=3.39384e-79;eval3=2.79601e-11;eval4=1.48518e-74:SU=5	CDS	14226560	14226606	-	LOC_Os01g25189.4:cds_8
chr01	14224458	14232011	BreakDancer:Pindel:DELLY:CNVnator:Lumpy	score=99;PE=18:SR=5;score=12:PE=16;SR=0:eval1=2.12497e-11;eval2=3.39384e-79;eval3=2.79601e-11;eval4=1.48518e-74:SU=5	CDS	14226325	14226406	-	LOC_Os01g25189.4:cds_9
chr01	14224458	14232011	BreakDancer:Pindel:DELLY:CNVnator:Lumpy	score=99;PE=18:SR=5;score=12:PE=16;SR=0:eval1=2.12497e-11;eval2=3.39384e-79;eval3=2.79601e-11;eval4=1.48518e-74:SU=5	CDS	14226026	14226102	-	LOC_Os01g25189.4:cds_10
chr01	14224458	14232011	BreakDancer:Pindel:DELLY:CNVnator:Lumpy	score=99;PE=18:SR=5;score=12:PE=16;SR=0:eval1=2.12497e-11;eval2=3.39384e-79;eval3=2.79601e-11;eval4=1.48518e-74:SU=5	CDS	14225803	14225922	-	LOC_Os01g25189.4:cds_11
chr01	14224458	14232011	BreakDancer:Pindel:DELLY:CNVnator:Lumpy	score=99;PE=18:SR=5;score=12:PE=16;SR=0:eval1=2.12497e-11;eval2=3.39384e-79;eval3=2.79601e-11;eval4=1.48518e-74:SU=5	CDS	14225253	14225327	-	LOC_Os01g25189.4:cds_12
chr01	14224458	14232011	BreakDancer:Pindel:DELLY:CNVnator:Lumpy	score=99;PE=18:SR=5;score=12:PE=16;SR=0:eval1=2.12497e-11;eval2=3.39384e-79;eval3=2.79601e-11;eval4=1.48518e-74:SU=5	CDS	14225020	14225173	-	LOC_Os01g25189.4:cds_13
chr01	14224458	14232011	BreakDancer:Pindel:DELLY:CNVnator:Lumpy	score=99;PE=18:SR=5;score=12:PE=16;SR=0:eval1=2.12497e-11;eval2=3.39384e-79;eval3=2.79601e-11;eval4=1.48518e-74:SU=5	three_prime_UTR	14224896	14225019	-	LOC_Os01g25189.4:utr_1
chr01	14224458	14232011	BreakDancer:Pindel:DELLY:CNVnator:Lumpy	score=99;PE=18:SR=5;score=12:PE=16;SR=0:eval1=2.12497e-11;eval2=3.39384e-79;eval3=2.79601e-11;eval4=1.48518e-74:SU=5	mRNA	14224896	14233656	-	LOC_Os01g25189.5
chr01	14224458	14232011	BreakDancer:Pindel:DELLY:CNVnator:Lumpy	score=99;PE=18:SR=5;score=12:PE=16;SR=0:eval1=2.12497e-11;eval2=3.39384e-79;eval3=2.79601e-11;eval4=1.48518e-74:SU=5	exon	14226026	14226102	-	LOC_Os01g25189.6:exon_13
chr01	14224458	14232011	BreakDancer:Pindel:DELLY:CNVnator:Lumpy	score=99;PE=18:SR=5;score=12:PE=16;SR=0:eval1=2.12497e-11;eval2=3.39384e-79;eval3=2.79601e-11;eval4=1.48518e-74:SU=5	exon	14228695	14228790	-	LOC_Os01g25189.5:exon_4
chr01	14224458	14232011	BreakDancer:Pindel:DELLY:CNVnator:Lumpy	score=99;PE=18:SR=5;score=12:PE=16;SR=0:eval1=2.12497e-11;eval2=3.39384e-79;eval3=2.79601e-11;eval4=1.48518e-74:SU=5	exon	14228497	14228614	-	LOC_Os01g25189.5:exon_5
chr01	14224458	14232011	BreakDancer:Pindel:DELLY:CNVnator:Lumpy	score=99;PE=18:SR=5;score=12:PE=16;SR=0:eval1=2.12497e-11;eval2=3.39384e-79;eval3=2.79601e-11;eval4=1.48518e-74:SU=5	exon	14228324	14228394	-	LOC_Os01g25189.5:exon_6
chr01	14224458	14232011	BreakDancer:Pindel:DELLY:CNVnator:Lumpy	score=99;PE=18:SR=5;score=12:PE=16;SR=0:eval1=2.12497e-11;eval2=3.39384e-79;eval3=2.79601e-11;eval4=1.48518e-74:SU=5	exon	14228122	14228178	-	LOC_Os01g25189.5:exon_7
chr01	14224458	14232011	BreakDancer:Pindel:DELLY:CNVnator:Lumpy	score=99;PE=18:SR=5;score=12:PE=16;SR=0:eval1=2.12497e-11;eval2=3.39384e-79;eval3=2.79601e-11;eval4=1.48518e-74:SU=5	exon	14227599	14227690	-	LOC_Os01g25189.5:exon_8
chr01	14224458	14232011	BreakDancer:Pindel:DELLY:CNVnator:Lumpy	score=99;PE=18:SR=5;score=12:PE=16;SR=0:eval1=2.12497e-11;eval2=3.39384e-79;eval3=2.79601e-11;eval4=1.48518e-74:SU=5	exon	14227309	14227356	-	LOC_Os01g25189.5:exon_9
chr01	14224458	14232011	BreakDancer:Pindel:DELLY:CNVnator:Lumpy	score=99;PE=18:SR=5;score=12:PE=16;SR=0:eval1=2.12497e-11;eval2=3.39384e-79;eval3=2.79601e-11;eval4=1.48518e-74:SU=5	exon	14226682	14226802	-	LOC_Os01g25189.5:exon_10
chr01	14224458	14232011	BreakDancer:Pindel:DELLY:CNVnator:Lumpy	score=99;PE=18:SR=5;score=12:PE=16;SR=0:eval1=2.12497e-11;eval2=3.39384e-79;eval3=2.79601e-11;eval4=1.48518e-74:SU=5	exon	14226560	14226606	-	LOC_Os01g25189.5:exon_11
chr01	14224458	14232011	BreakDancer:Pindel:DELLY:CNVnator:Lumpy	score=99;PE=18:SR=5;score=12:PE=16;SR=0:eval1=2.12497e-11;eval2=3.39384e-79;eval3=2.79601e-11;eval4=1.48518e-74:SU=5	exon	14226325	14226406	-	LOC_Os01g25189.5:exon_12
chr01	14224458	14232011	BreakDancer:Pindel:DELLY:CNVnator:Lumpy	score=99;PE=18:SR=5;score=12:PE=16;SR=0:eval1=2.12497e-11;eval2=3.39384e-79;eval3=2.79601e-11;eval4=1.48518e-74:SU=5	exon	14226026	14226102	-	LOC_Os01g25189.5:exon_13
chr01	14224458	14232011	BreakDancer:Pindel:DELLY:CNVnator:Lumpy	score=99;PE=18:SR=5;score=12:PE=16;SR=0:eval1=2.12497e-11;eval2=3.39384e-79;eval3=2.79601e-11;eval4=1.48518e-74:SU=5	exon	14225803	14225922	-	LOC_Os01g25189.5:exon_14
chr01	14224458	14232011	BreakDancer:Pindel:DELLY:CNVnator:Lumpy	score=99;PE=18:SR=5;score=12:PE=16;SR=0:eval1=2.12497e-11;eval2=3.39384e-79;eval3=2.79601e-11;eval4=1.48518e-74:SU=5	exon	14225253	14225327	-	LOC_Os01g25189.5:exon_15
chr01	14224458	14232011	BreakDancer:Pindel:DELLY:CNVnator:Lumpy	score=99;PE=18:SR=5;score=12:PE=16;SR=0:eval1=2.12497e-11;eval2=3.39384e-79;eval3=2.79601e-11;eval4=1.48518e-74:SU=5	exon	14224896	14225178	-	LOC_Os01g25189.5:exon_16
chr01	14224458	14232011	BreakDancer:Pindel:DELLY:CNVnator:Lumpy	score=99;PE=18:SR=5;score=12:PE=16;SR=0:eval1=2.12497e-11;eval2=3.39384e-79;eval3=2.79601e-11;eval4=1.48518e-74:SU=5	five_prime_UTR	14228743	14228790	-	LOC_Os01g25189.5:utr_2
chr01	14224458	14232011	BreakDancer:Pindel:DELLY:CNVnator:Lumpy	score=99;PE=18:SR=5;score=12:PE=16;SR=0:eval1=2.12497e-11;eval2=3.39384e-79;eval3=2.79601e-11;eval4=1.48518e-74:SU=5	CDS	14228695	14228742	-	LOC_Os01g25189.5:cds_1
chr01	14224458	14232011	BreakDancer:Pindel:DELLY:CNVnator:Lumpy	score=99;PE=18:SR=5;score=12:PE=16;SR=0:eval1=2.12497e-11;eval2=3.39384e-79;eval3=2.79601e-11;eval4=1.48518e-74:SU=5	CDS	14228497	14228614	-	LOC_Os01g25189.5:cds_2
chr01	14224458	14232011	BreakDancer:Pindel:DELLY:CNVnator:Lumpy	score=99;PE=18:SR=5;score=12:PE=16;SR=0:eval1=2.12497e-11;eval2=3.39384e-79;eval3=2.79601e-11;eval4=1.48518e-74:SU=5	CDS	14228324	14228394	-	LOC_Os01g25189.5:cds_3
chr01	14224458	14232011	BreakDancer:Pindel:DELLY:CNVnator:Lumpy	score=99;PE=18:SR=5;score=12:PE=16;SR=0:eval1=2.12497e-11;eval2=3.39384e-79;eval3=2.79601e-11;eval4=1.48518e-74:SU=5	CDS	14228122	14228178	-	LOC_Os01g25189.5:cds_4
chr01	14224458	14232011	BreakDancer:Pindel:DELLY:CNVnator:Lumpy	score=99;PE=18:SR=5;score=12:PE=16;SR=0:eval1=2.12497e-11;eval2=3.39384e-79;eval3=2.79601e-11;eval4=1.48518e-74:SU=5	CDS	14227599	14227690	-	LOC_Os01g25189.5:cds_5
chr01	14224458	14232011	BreakDancer:Pindel:DELLY:CNVnator:Lumpy	score=99;PE=18:SR=5;score=12:PE=16;SR=0:eval1=2.12497e-11;eval2=3.39384e-79;eval3=2.79601e-11;eval4=1.48518e-74:SU=5	CDS	14227309	14227356	-	LOC_Os01g25189.5:cds_6
chr01	14224458	14232011	BreakDancer:Pindel:DELLY:CNVnator:Lumpy	score=99;PE=18:SR=5;score=12:PE=16;SR=0:eval1=2.12497e-11;eval2=3.39384e-79;eval3=2.79601e-11;eval4=1.48518e-74:SU=5	exon	14228122	14228178	-	LOC_Os01g25189.6:exon_7
chr01	14224458	14232011	BreakDancer:Pindel:DELLY:CNVnator:Lumpy	score=99;PE=18:SR=5;score=12:PE=16;SR=0:eval1=2.12497e-11;eval2=3.39384e-79;eval3=2.79601e-11;eval4=1.48518e-74:SU=5	CDS	14226560	14226606	-	LOC_Os01g25189.5:cds_8
chr01	14224458	14232011	BreakDancer:Pindel:DELLY:CNVnator:Lumpy	score=99;PE=18:SR=5;score=12:PE=16;SR=0:eval1=2.12497e-11;eval2=3.39384e-79;eval3=2.79601e-11;eval4=1.48518e-74:SU=5	CDS	14226325	14226406	-	LOC_Os01g25189.5:cds_9
chr01	14224458	14232011	BreakDancer:Pindel:DELLY:CNVnator:Lumpy	score=99;PE=18:SR=5;score=12:PE=16;SR=0:eval1=2.12497e-11;eval2=3.39384e-79;eval3=2.79601e-11;eval4=1.48518e-74:SU=5	CDS	14226026	14226102	-	LOC_Os01g25189.5:cds_10
chr01	14224458	14232011	BreakDancer:Pindel:DELLY:CNVnator:Lumpy	score=99;PE=18:SR=5;score=12:PE=16;SR=0:eval1=2.12497e-11;eval2=3.39384e-79;eval3=2.79601e-11;eval4=1.48518e-74:SU=5	CDS	14225803	14225922	-	LOC_Os01g25189.5:cds_11
chr01	14224458	14232011	BreakDancer:Pindel:DELLY:CNVnator:Lumpy	score=99;PE=18:SR=5;score=12:PE=16;SR=0:eval1=2.12497e-11;eval2=3.39384e-79;eval3=2.79601e-11;eval4=1.48518e-74:SU=5	CDS	14225253	14225327	-	LOC_Os01g25189.5:cds_12
chr01	14224458	14232011	BreakDancer:Pindel:DELLY:CNVnator:Lumpy	score=99;PE=18:SR=5;score=12:PE=16;SR=0:eval1=2.12497e-11;eval2=3.39384e-79;eval3=2.79601e-11;eval4=1.48518e-74:SU=5	CDS	14225166	14225178	-	LOC_Os01g25189.5:cds_13
chr01	14224458	14232011	BreakDancer:Pindel:DELLY:CNVnator:Lumpy	score=99;PE=18:SR=5;score=12:PE=16;SR=0:eval1=2.12497e-11;eval2=3.39384e-79;eval3=2.79601e-11;eval4=1.48518e-74:SU=5	three_prime_UTR	14224896	14225165	-	LOC_Os01g25189.5:utr_1
chr01	14224458	14232011	BreakDancer:Pindel:DELLY:CNVnator:Lumpy	score=99;PE=18:SR=5;score=12:PE=16;SR=0:eval1=2.12497e-11;eval2=3.39384e-79;eval3=2.79601e-11;eval4=1.48518e-74:SU=5	five_prime_UTR	14228743	14228790	-	LOC_Os01g25189.6:utr_2
chr01	14224458	14232011	BreakDancer:Pindel:DELLY:CNVnator:Lumpy	score=99;PE=18:SR=5;score=12:PE=16;SR=0:eval1=2.12497e-11;eval2=3.39384e-79;eval3=2.79601e-11;eval4=1.48518e-74:SU=5	CDS	14228695	14228742	-	LOC_Os01g25189.6:cds_1
chr01	14224458	14232011	BreakDancer:Pindel:DELLY:CNVnator:Lumpy	score=99;PE=18:SR=5;score=12:PE=16;SR=0:eval1=2.12497e-11;eval2=3.39384e-79;eval3=2.79601e-11;eval4=1.48518e-74:SU=5	exon	14228695	14228790	-	LOC_Os01g25189.6:exon_4
chr01	14224458	14232011	BreakDancer:Pindel:DELLY:CNVnator:Lumpy	score=99;PE=18:SR=5;score=12:PE=16;SR=0:eval1=2.12497e-11;eval2=3.39384e-79;eval3=2.79601e-11;eval4=1.48518e-74:SU=5	CDS	14228324	14228394	-	LOC_Os01g25189.6:cds_3
chr01	14224458	14232011	BreakDancer:Pindel:DELLY:CNVnator:Lumpy	score=99;PE=18:SR=5;score=12:PE=16;SR=0:eval1=2.12497e-11;eval2=3.39384e-79;eval3=2.79601e-11;eval4=1.48518e-74:SU=5	exon	14228324	14228394	-	LOC_Os01g25189.6:exon_6
chr01	14224458	14232011	BreakDancer:Pindel:DELLY:CNVnator:Lumpy	score=99;PE=18:SR=5;score=12:PE=16;SR=0:eval1=2.12497e-11;eval2=3.39384e-79;eval3=2.79601e-11;eval4=1.48518e-74:SU=5	CDS	14227599	14227690	-	LOC_Os01g25189.6:cds_5
chr01	14224458	14232011	BreakDancer:Pindel:DELLY:CNVnator:Lumpy	score=99;PE=18:SR=5;score=12:PE=16;SR=0:eval1=2.12497e-11;eval2=3.39384e-79;eval3=2.79601e-11;eval4=1.48518e-74:SU=5	exon	14227599	14227690	-	LOC_Os01g25189.6:exon_8
chr01	14224458	14232011	BreakDancer:Pindel:DELLY:CNVnator:Lumpy	score=99;PE=18:SR=5;score=12:PE=16;SR=0:eval1=2.12497e-11;eval2=3.39384e-79;eval3=2.79601e-11;eval4=1.48518e-74:SU=5	exon	14227309	14227356	-	LOC_Os01g25189.6:exon_9
chr01	14224458	14232011	BreakDancer:Pindel:DELLY:CNVnator:Lumpy	score=99;PE=18:SR=5;score=12:PE=16;SR=0:eval1=2.12497e-11;eval2=3.39384e-79;eval3=2.79601e-11;eval4=1.48518e-74:SU=5	exon	14226682	14226802	-	LOC_Os01g25189.6:exon_10
chr01	14224458	14232011	BreakDancer:Pindel:DELLY:CNVnator:Lumpy	score=99;PE=18:SR=5;score=12:PE=16;SR=0:eval1=2.12497e-11;eval2=3.39384e-79;eval3=2.79601e-11;eval4=1.48518e-74:SU=5	exon	14226560	14226606	-	LOC_Os01g25189.6:exon_11
chr01	14224458	14232011	BreakDancer:Pindel:DELLY:CNVnator:Lumpy	score=99;PE=18:SR=5;score=12:PE=16;SR=0:eval1=2.12497e-11;eval2=3.39384e-79;eval3=2.79601e-11;eval4=1.48518e-74:SU=5	exon	14226325	14226406	-	LOC_Os01g25189.6:exon_12
chr01	14224458	14232011	BreakDancer:Pindel:DELLY:CNVnator:Lumpy	score=99;PE=18:SR=5;score=12:PE=16;SR=0:eval1=2.12497e-11;eval2=3.39384e-79;eval3=2.79601e-11;eval4=1.48518e-74:SU=5	CDS	14225799	14225922	-	LOC_Os01g25189.6:cds_11
chr01	14224458	14232011	BreakDancer:Pindel:DELLY:CNVnator:Lumpy	score=99;PE=18:SR=5;score=12:PE=16;SR=0:eval1=2.12497e-11;eval2=3.39384e-79;eval3=2.79601e-11;eval4=1.48518e-74:SU=5	exon	14225415	14225922	-	LOC_Os01g25189.6:exon_14
chr01	14224458	14232011	BreakDancer:Pindel:DELLY:CNVnator:Lumpy	score=99;PE=18:SR=5;score=12:PE=16;SR=0:eval1=2.12497e-11;eval2=3.39384e-79;eval3=2.79601e-11;eval4=1.48518e-74:SU=5	CDS	14228122	14228178	-	LOC_Os01g25189.6:cds_4
chr01	14224458	14232011	BreakDancer:Pindel:DELLY:CNVnator:Lumpy	score=99;PE=18:SR=5;score=12:PE=16;SR=0:eval1=2.12497e-11;eval2=3.39384e-79;eval3=2.79601e-11;eval4=1.48518e-74:SU=5	CDS	14226325	14226406	-	LOC_Os01g25189.6:cds_9
chr01	14224458	14232011	BreakDancer:Pindel:DELLY:CNVnator:Lumpy	score=99;PE=18:SR=5;score=12:PE=16;SR=0:eval1=2.12497e-11;eval2=3.39384e-79;eval3=2.79601e-11;eval4=1.48518e-74:SU=5	CDS	14228497	14228614	-	LOC_Os01g25189.6:cds_2
chr01	14224458	14232011	BreakDancer:Pindel:DELLY:CNVnator:Lumpy	score=99;PE=18:SR=5;score=12:PE=16;SR=0:eval1=2.12497e-11;eval2=3.39384e-79;eval3=2.79601e-11;eval4=1.48518e-74:SU=5	CDS	14226682	14226802	-	LOC_Os01g25189.6:cds_7
chr01	14224458	14232011	BreakDancer:Pindel:DELLY:CNVnator:Lumpy	score=99;PE=18:SR=5;score=12:PE=16;SR=0:eval1=2.12497e-11;eval2=3.39384e-79;eval3=2.79601e-11;eval4=1.48518e-74:SU=5	CDS	14226560	14226606	-	LOC_Os01g25189.6:cds_8
chr01	14224458	14232011	BreakDancer:Pindel:DELLY:CNVnator:Lumpy	score=99;PE=18:SR=5;score=12:PE=16;SR=0:eval1=2.12497e-11;eval2=3.39384e-79;eval3=2.79601e-11;eval4=1.48518e-74:SU=5	CDS	14227309	14227356	-	LOC_Os01g25189.6:cds_6
chr01	14224458	14232011	BreakDancer:Pindel:DELLY:CNVnator:Lumpy	score=99;PE=18:SR=5;score=12:PE=16;SR=0:eval1=2.12497e-11;eval2=3.39384e-79;eval3=2.79601e-11;eval4=1.48518e-74:SU=5	three_prime_UTR	14225415	14225798	-	LOC_Os01g25189.6:utr_1
chr01	14224458	14232011	BreakDancer:Pindel:DELLY:CNVnator:Lumpy	score=99;PE=18:SR=5;score=12:PE=16;SR=0:eval1=2.12497e-11;eval2=3.39384e-79;eval3=2.79601e-11;eval4=1.48518e-74:SU=5	CDS	14226026	14226102	-	LOC_Os01g25189.6:cds_10
chr01	14232722	14232946	BreakDancer:Pindel:DELLY:SVseq2	score=99;PE=18:SR=7;score=18:PE=0;SR=5:SR=4	gene	14224896	14233656	-	LOC_Os01g25189
chr01	14232722	14232946	BreakDancer:Pindel:DELLY:SVseq2	score=99;PE=18:SR=7;score=18:PE=0;SR=5:SR=4	mRNA	14224896	14233656	-	LOC_Os01g25189.1
chr01	14232722	14232946	BreakDancer:Pindel:DELLY:SVseq2	score=99;PE=18:SR=7;score=18:PE=0;SR=5:SR=4	mRNA	14224904	14233645	-	LOC_Os01g25189.2
chr01	14232722	14232946	BreakDancer:Pindel:DELLY:SVseq2	score=99;PE=18:SR=7;score=18:PE=0;SR=5:SR=4	mRNA	14224896	14233656	-	LOC_Os01g25189.5
chr01	14232722	14232946	BreakDancer:Pindel:DELLY:SVseq2	score=99;PE=18:SR=7;score=18:PE=0;SR=5:SR=4	mRNA	14225415	14233656	-	LOC_Os01g25189.6
chr01	14237402	14243987	BreakDancer:Pindel:DELLY:Lumpy	score=99;PE=8:SR=5;score=12:PE=13;SR=0:SU=5	NA	NA	NA	NA	NA
chr01	14282457	14283042	BreakDancer:DELLY	score=99;PE=5:PE=5;SR=0	NA	NA	NA	NA	NA
chr01	14292883	14293926	BreakDancer:DELLY:Lumpy	score=99;PE=17:PE=18;SR=0:SU=4	gene	14292067	14303222	-	LOC_Os01g25320
chr01	14292883	14293926	BreakDancer:DELLY:Lumpy	score=99;PE=17:PE=18;SR=0:SU=4	mRNA	14292067	14303222	-	LOC_Os01g25320.1
chr01	14268228	14274486	Pindel:DELLY	SR=8;score=24:PE=3;SR=0	NA	NA	NA	NA	NA
chr01	14301190	14301455	BreakDancer:Pindel:SVseq2	score=99;PE=15:SR=9;score=30:SR=3	gene	14292067	14303222	-	LOC_Os01g25320
chr01	14301190	14301455	BreakDancer:Pindel:SVseq2	score=99;PE=15:SR=9;score=30:SR=3	mRNA	14292067	14303222	-	LOC_Os01g25320.1
chr01	14322081	14322402	Pindel:DELLY	SR=5;score=10:PE=3;SR=0	NA	NA	NA	NA	NA
chr01	14324426	14324740	BreakDancer:Pindel:DELLY	score=99;PE=4:SR=3;score=6:PE=5;SR=0	NA	NA	NA	NA	NA
chr01	14364274	14374852	BreakDancer:DELLY	score=99;PE=14:PE=14;SR=0	gene	14365180	14374329	+	LOC_Os01g25402
chr01	14364274	14374852	BreakDancer:DELLY	score=99;PE=14:PE=14;SR=0	mRNA	14365180	14374329	+	LOC_Os01g25402.1
chr01	14364274	14374852	BreakDancer:DELLY	score=99;PE=14:PE=14;SR=0	exon	14365180	14366767	+	LOC_Os01g25402.1:exon_1
chr01	14364274	14374852	BreakDancer:DELLY	score=99;PE=14:PE=14;SR=0	exon	14367192	14368455	+	LOC_Os01g25402.1:exon_2
chr01	14364274	14374852	BreakDancer:DELLY	score=99;PE=14:PE=14;SR=0	exon	14370093	14370129	+	LOC_Os01g25402.1:exon_3
chr01	14364274	14374852	BreakDancer:DELLY	score=99;PE=14:PE=14;SR=0	exon	14370670	14372088	+	LOC_Os01g25402.1:exon_4
chr01	14364274	14374852	BreakDancer:DELLY	score=99;PE=14:PE=14;SR=0	exon	14372182	14372844	+	LOC_Os01g25402.1:exon_5
chr01	14364274	14374852	BreakDancer:DELLY	score=99;PE=14:PE=14;SR=0	exon	14372938	14373221	+	LOC_Os01g25402.1:exon_6
chr01	14364274	14374852	BreakDancer:DELLY	score=99;PE=14:PE=14;SR=0	exon	14373310	14373483	+	LOC_Os01g25402.1:exon_7
chr01	14364274	14374852	BreakDancer:DELLY	score=99;PE=14:PE=14;SR=0	exon	14373784	14373856	+	LOC_Os01g25402.1:exon_8
chr01	14364274	14374852	BreakDancer:DELLY	score=99;PE=14:PE=14;SR=0	exon	14373952	14374050	+	LOC_Os01g25402.1:exon_9
chr01	14364274	14374852	BreakDancer:DELLY	score=99;PE=14:PE=14;SR=0	exon	14374150	14374329	+	LOC_Os01g25402.1:exon_10
chr01	14364274	14374852	BreakDancer:DELLY	score=99;PE=14:PE=14;SR=0	CDS	14365180	14366767	+	LOC_Os01g25402.1:cds_1
chr01	14364274	14374852	BreakDancer:DELLY	score=99;PE=14:PE=14;SR=0	CDS	14367192	14368455	+	LOC_Os01g25402.1:cds_2
chr01	14364274	14374852	BreakDancer:DELLY	score=99;PE=14:PE=14;SR=0	CDS	14370093	14370129	+	LOC_Os01g25402.1:cds_3
chr01	14364274	14374852	BreakDancer:DELLY	score=99;PE=14:PE=14;SR=0	CDS	14370670	14372088	+	LOC_Os01g25402.1:cds_4
chr01	14364274	14374852	BreakDancer:DELLY	score=99;PE=14:PE=14;SR=0	CDS	14372182	14372844	+	LOC_Os01g25402.1:cds_5
chr01	14364274	14374852	BreakDancer:DELLY	score=99;PE=14:PE=14;SR=0	CDS	14372938	14373221	+	LOC_Os01g25402.1:cds_6
chr01	14364274	14374852	BreakDancer:DELLY	score=99;PE=14:PE=14;SR=0	CDS	14373310	14373483	+	LOC_Os01g25402.1:cds_7
chr01	14364274	14374852	BreakDancer:DELLY	score=99;PE=14:PE=14;SR=0	CDS	14373784	14373856	+	LOC_Os01g25402.1:cds_8
chr01	14364274	14374852	BreakDancer:DELLY	score=99;PE=14:PE=14;SR=0	CDS	14373952	14374050	+	LOC_Os01g25402.1:cds_9
chr01	14364274	14374852	BreakDancer:DELLY	score=99;PE=14:PE=14;SR=0	CDS	14374150	14374329	+	LOC_Os01g25402.1:cds_10
chr01	14490112	14502780	BreakDancer:Pindel:DELLY:Lumpy	score=99;PE=11:SR=3;score=6:PE=9;SR=0:SU=5	gene	14491333	14497302	+	LOC_Os01g25580
chr01	14490112	14502780	BreakDancer:Pindel:DELLY:Lumpy	score=99;PE=11:SR=3;score=6:PE=9;SR=0:SU=5	mRNA	14491333	14497302	+	LOC_Os01g25580.1
chr01	14490112	14502780	BreakDancer:Pindel:DELLY:Lumpy	score=99;PE=11:SR=3;score=6:PE=9;SR=0:SU=5	exon	14491333	14493693	+	LOC_Os01g25580.1:exon_1
chr01	14490112	14502780	BreakDancer:Pindel:DELLY:Lumpy	score=99;PE=11:SR=3;score=6:PE=9;SR=0:SU=5	exon	14493766	14495157	+	LOC_Os01g25580.1:exon_2
chr01	14490112	14502780	BreakDancer:Pindel:DELLY:Lumpy	score=99;PE=11:SR=3;score=6:PE=9;SR=0:SU=5	exon	14495281	14497302	+	LOC_Os01g25580.1:exon_3
chr01	14490112	14502780	BreakDancer:Pindel:DELLY:Lumpy	score=99;PE=11:SR=3;score=6:PE=9;SR=0:SU=5	CDS	14491333	14493693	+	LOC_Os01g25580.1:cds_1
chr01	14490112	14502780	BreakDancer:Pindel:DELLY:Lumpy	score=99;PE=11:SR=3;score=6:PE=9;SR=0:SU=5	CDS	14493766	14495157	+	LOC_Os01g25580.1:cds_2
chr01	14490112	14502780	BreakDancer:Pindel:DELLY:Lumpy	score=99;PE=11:SR=3;score=6:PE=9;SR=0:SU=5	CDS	14495281	14497302	+	LOC_Os01g25580.1:cds_3
chr01	14490112	14502780	BreakDancer:Pindel:DELLY:Lumpy	score=99;PE=11:SR=3;score=6:PE=9;SR=0:SU=5	gene	14497938	14501078	-	LOC_Os01g25590
chr01	14490112	14502780	BreakDancer:Pindel:DELLY:Lumpy	score=99;PE=11:SR=3;score=6:PE=9;SR=0:SU=5	mRNA	14497938	14501078	-	LOC_Os01g25590.1
chr01	14490112	14502780	BreakDancer:Pindel:DELLY:Lumpy	score=99;PE=11:SR=3;score=6:PE=9;SR=0:SU=5	exon	14497938	14501078	-	LOC_Os01g25590.1:exon_1
chr01	14490112	14502780	BreakDancer:Pindel:DELLY:Lumpy	score=99;PE=11:SR=3;score=6:PE=9;SR=0:SU=5	CDS	14497938	14501078	-	LOC_Os01g25590.1:cds_1
chr01	14533856	14543733	BreakDancer:DELLY	score=63;PE=4:PE=8;SR=0	gene	14534152	14534475	+	LOC_Os01g25640
chr01	14533856	14543733	BreakDancer:DELLY	score=63;PE=4:PE=8;SR=0	mRNA	14534152	14534475	+	LOC_Os01g25640.1
chr01	14533856	14543733	BreakDancer:DELLY	score=63;PE=4:PE=8;SR=0	exon	14534152	14534475	+	LOC_Os01g25640.1:exon_1
chr01	14533856	14543733	BreakDancer:DELLY	score=63;PE=4:PE=8;SR=0	CDS	14534152	14534475	+	LOC_Os01g25640.1:cds_1
chr01	14533856	14543733	BreakDancer:DELLY	score=63;PE=4:PE=8;SR=0	gene	14535580	14542971	+	LOC_Os01g25650
chr01	14533856	14543733	BreakDancer:DELLY	score=63;PE=4:PE=8;SR=0	mRNA	14535580	14542971	+	LOC_Os01g25650.1
chr01	14533856	14543733	BreakDancer:DELLY	score=63;PE=4:PE=8;SR=0	exon	14535580	14536288	+	LOC_Os01g25650.1:exon_1
chr01	14533856	14543733	BreakDancer:DELLY	score=63;PE=4:PE=8;SR=0	exon	14536500	14536606	+	LOC_Os01g25650.1:exon_2
chr01	14533856	14543733	BreakDancer:DELLY	score=63;PE=4:PE=8;SR=0	exon	14536876	14537960	+	LOC_Os01g25650.1:exon_3
chr01	14533856	14543733	BreakDancer:DELLY	score=63;PE=4:PE=8;SR=0	exon	14538015	14538250	+	LOC_Os01g25650.1:exon_4
chr01	14533856	14543733	BreakDancer:DELLY	score=63;PE=4:PE=8;SR=0	exon	14538474	14538679	+	LOC_Os01g25650.1:exon_5
chr01	14533856	14543733	BreakDancer:DELLY	score=63;PE=4:PE=8;SR=0	exon	14538749	14539097	+	LOC_Os01g25650.1:exon_6
chr01	14533856	14543733	BreakDancer:DELLY	score=63;PE=4:PE=8;SR=0	exon	14539396	14539686	+	LOC_Os01g25650.1:exon_7
chr01	14533856	14543733	BreakDancer:DELLY	score=63;PE=4:PE=8;SR=0	exon	14539842	14540754	+	LOC_Os01g25650.1:exon_8
chr01	14533856	14543733	BreakDancer:DELLY	score=63;PE=4:PE=8;SR=0	exon	14541367	14541609	+	LOC_Os01g25650.1:exon_9
chr01	14533856	14543733	BreakDancer:DELLY	score=63;PE=4:PE=8;SR=0	exon	14542023	14542971	+	LOC_Os01g25650.1:exon_10
chr01	14533856	14543733	BreakDancer:DELLY	score=63;PE=4:PE=8;SR=0	CDS	14535580	14536288	+	LOC_Os01g25650.1:cds_1
chr01	14533856	14543733	BreakDancer:DELLY	score=63;PE=4:PE=8;SR=0	CDS	14536500	14536606	+	LOC_Os01g25650.1:cds_2
chr01	14533856	14543733	BreakDancer:DELLY	score=63;PE=4:PE=8;SR=0	CDS	14536876	14537960	+	LOC_Os01g25650.1:cds_3
chr01	14533856	14543733	BreakDancer:DELLY	score=63;PE=4:PE=8;SR=0	CDS	14538015	14538250	+	LOC_Os01g25650.1:cds_4
chr01	14533856	14543733	BreakDancer:DELLY	score=63;PE=4:PE=8;SR=0	CDS	14538474	14538679	+	LOC_Os01g25650.1:cds_5
chr01	14533856	14543733	BreakDancer:DELLY	score=63;PE=4:PE=8;SR=0	CDS	14538749	14539097	+	LOC_Os01g25650.1:cds_6
chr01	14533856	14543733	BreakDancer:DELLY	score=63;PE=4:PE=8;SR=0	CDS	14539396	14539686	+	LOC_Os01g25650.1:cds_7
chr01	14533856	14543733	BreakDancer:DELLY	score=63;PE=4:PE=8;SR=0	CDS	14539842	14540754	+	LOC_Os01g25650.1:cds_8
chr01	14533856	14543733	BreakDancer:DELLY	score=63;PE=4:PE=8;SR=0	CDS	14541367	14541609	+	LOC_Os01g25650.1:cds_9
chr01	14533856	14543733	BreakDancer:DELLY	score=63;PE=4:PE=8;SR=0	CDS	14542023	14542971	+	LOC_Os01g25650.1:cds_10
chr01	14550552	14576035	BreakDancer:DELLY:Lumpy	score=99;PE=7:PE=13;SR=0:SU=4	gene	14551107	14552310	-	LOC_Os01g25670
chr01	14550552	14576035	BreakDancer:DELLY:Lumpy	score=99;PE=7:PE=13;SR=0:SU=4	mRNA	14551107	14552310	-	LOC_Os01g25670.1
chr01	14550552	14576035	BreakDancer:DELLY:Lumpy	score=99;PE=7:PE=13;SR=0:SU=4	exon	14552241	14552310	-	LOC_Os01g25670.1:exon_1
chr01	14550552	14576035	BreakDancer:DELLY:Lumpy	score=99;PE=7:PE=13;SR=0:SU=4	exon	14551996	14552065	-	LOC_Os01g25670.1:exon_2
chr01	14550552	14576035	BreakDancer:DELLY:Lumpy	score=99;PE=7:PE=13;SR=0:SU=4	exon	14551565	14551637	-	LOC_Os01g25670.1:exon_3
chr01	14550552	14576035	BreakDancer:DELLY:Lumpy	score=99;PE=7:PE=13;SR=0:SU=4	exon	14551372	14551470	-	LOC_Os01g25670.1:exon_4
chr01	14550552	14576035	BreakDancer:DELLY:Lumpy	score=99;PE=7:PE=13;SR=0:SU=4	exon	14551107	14551292	-	LOC_Os01g25670.1:exon_5
chr01	14550552	14576035	BreakDancer:DELLY:Lumpy	score=99;PE=7:PE=13;SR=0:SU=4	CDS	14552241	14552310	-	LOC_Os01g25670.1:cds_1
chr01	14550552	14576035	BreakDancer:DELLY:Lumpy	score=99;PE=7:PE=13;SR=0:SU=4	CDS	14551996	14552065	-	LOC_Os01g25670.1:cds_2
chr01	14550552	14576035	BreakDancer:DELLY:Lumpy	score=99;PE=7:PE=13;SR=0:SU=4	CDS	14551565	14551637	-	LOC_Os01g25670.1:cds_3
chr01	14550552	14576035	BreakDancer:DELLY:Lumpy	score=99;PE=7:PE=13;SR=0:SU=4	CDS	14551372	14551470	-	LOC_Os01g25670.1:cds_4
chr01	14550552	14576035	BreakDancer:DELLY:Lumpy	score=99;PE=7:PE=13;SR=0:SU=4	CDS	14551107	14551292	-	LOC_Os01g25670.1:cds_5
chr01	14550552	14576035	BreakDancer:DELLY:Lumpy	score=99;PE=7:PE=13;SR=0:SU=4	gene	14555698	14559975	-	LOC_Os01g25679
chr01	14550552	14576035	BreakDancer:DELLY:Lumpy	score=99;PE=7:PE=13;SR=0:SU=4	mRNA	14555698	14559975	-	LOC_Os01g25679.1
chr01	14550552	14576035	BreakDancer:DELLY:Lumpy	score=99;PE=7:PE=13;SR=0:SU=4	exon	14559921	14559975	-	LOC_Os01g25679.1:exon_1
chr01	14550552	14576035	BreakDancer:DELLY:Lumpy	score=99;PE=7:PE=13;SR=0:SU=4	exon	14558400	14559259	-	LOC_Os01g25679.1:exon_2
chr01	14550552	14576035	BreakDancer:DELLY:Lumpy	score=99;PE=7:PE=13;SR=0:SU=4	exon	14555698	14558352	-	LOC_Os01g25679.1:exon_3
chr01	14550552	14576035	BreakDancer:DELLY:Lumpy	score=99;PE=7:PE=13;SR=0:SU=4	CDS	14559921	14559975	-	LOC_Os01g25679.1:cds_1
chr01	14550552	14576035	BreakDancer:DELLY:Lumpy	score=99;PE=7:PE=13;SR=0:SU=4	CDS	14558400	14559259	-	LOC_Os01g25679.1:cds_2
chr01	14550552	14576035	BreakDancer:DELLY:Lumpy	score=99;PE=7:PE=13;SR=0:SU=4	CDS	14555698	14558352	-	LOC_Os01g25679.1:cds_3
chr01	14550552	14576035	BreakDancer:DELLY:Lumpy	score=99;PE=7:PE=13;SR=0:SU=4	gene	14562240	14564681	-	LOC_Os01g25688
chr01	14550552	14576035	BreakDancer:DELLY:Lumpy	score=99;PE=7:PE=13;SR=0:SU=4	mRNA	14562240	14564681	-	LOC_Os01g25688.1
chr01	14550552	14576035	BreakDancer:DELLY:Lumpy	score=99;PE=7:PE=13;SR=0:SU=4	exon	14564015	14564681	-	LOC_Os01g25688.1:exon_1
chr01	14550552	14576035	BreakDancer:DELLY:Lumpy	score=99;PE=7:PE=13;SR=0:SU=4	exon	14563519	14563936	-	LOC_Os01g25688.1:exon_2
chr01	14550552	14576035	BreakDancer:DELLY:Lumpy	score=99;PE=7:PE=13;SR=0:SU=4	exon	14562240	14563077	-	LOC_Os01g25688.1:exon_3
chr01	14550552	14576035	BreakDancer:DELLY:Lumpy	score=99;PE=7:PE=13;SR=0:SU=4	CDS	14564015	14564681	-	LOC_Os01g25688.1:cds_1
chr01	14550552	14576035	BreakDancer:DELLY:Lumpy	score=99;PE=7:PE=13;SR=0:SU=4	CDS	14563519	14563936	-	LOC_Os01g25688.1:cds_2
chr01	14550552	14576035	BreakDancer:DELLY:Lumpy	score=99;PE=7:PE=13;SR=0:SU=4	CDS	14562240	14563077	-	LOC_Os01g25688.1:cds_3
chr01	14550552	14576035	BreakDancer:DELLY:Lumpy	score=99;PE=7:PE=13;SR=0:SU=4	gene	14567221	14570248	-	LOC_Os01g25700
chr01	14550552	14576035	BreakDancer:DELLY:Lumpy	score=99;PE=7:PE=13;SR=0:SU=4	mRNA	14567221	14570248	-	LOC_Os01g25700.1
chr01	14550552	14576035	BreakDancer:DELLY:Lumpy	score=99;PE=7:PE=13;SR=0:SU=4	exon	14569952	14570248	-	LOC_Os01g25700.1:exon_1
chr01	14550552	14576035	BreakDancer:DELLY:Lumpy	score=99;PE=7:PE=13;SR=0:SU=4	exon	14567454	14568875	-	LOC_Os01g25700.1:exon_2
chr01	14550552	14576035	BreakDancer:DELLY:Lumpy	score=99;PE=7:PE=13;SR=0:SU=4	exon	14567221	14567379	-	LOC_Os01g25700.1:exon_3
chr01	14550552	14576035	BreakDancer:DELLY:Lumpy	score=99;PE=7:PE=13;SR=0:SU=4	CDS	14569952	14570248	-	LOC_Os01g25700.1:cds_1
chr01	14550552	14576035	BreakDancer:DELLY:Lumpy	score=99;PE=7:PE=13;SR=0:SU=4	CDS	14567454	14568875	-	LOC_Os01g25700.1:cds_2
chr01	14550552	14576035	BreakDancer:DELLY:Lumpy	score=99;PE=7:PE=13;SR=0:SU=4	CDS	14567221	14567379	-	LOC_Os01g25700.1:cds_3
chr01	14550552	14576035	BreakDancer:DELLY:Lumpy	score=99;PE=7:PE=13;SR=0:SU=4	gene	14571837	14581150	-	LOC_Os01g25710
chr01	14550552	14576035	BreakDancer:DELLY:Lumpy	score=99;PE=7:PE=13;SR=0:SU=4	exon	14574203	14575153	-	LOC_Os01g25710.1:exon_1
chr01	14550552	14576035	BreakDancer:DELLY:Lumpy	score=99;PE=7:PE=13;SR=0:SU=4	mRNA	14571837	14581150	-	LOC_Os01g25710.1
chr01	14550552	14576035	BreakDancer:DELLY:Lumpy	score=99;PE=7:PE=13;SR=0:SU=4	gene	14571837	14581967	-	LOC_Os01g25720
chr01	14550552	14576035	BreakDancer:DELLY:Lumpy	score=99;PE=7:PE=13;SR=0:SU=4	five_prime_UTR	14575143	14575153	-	LOC_Os01g25710.1:utr_1
chr01	14550552	14576035	BreakDancer:DELLY:Lumpy	score=99;PE=7:PE=13;SR=0:SU=4	CDS	14574203	14575142	-	LOC_Os01g25710.1:cds_1
chr01	14550552	14576035	BreakDancer:DELLY:Lumpy	score=99;PE=7:PE=13;SR=0:SU=4	exon	14571837	14573992	-	LOC_Os01g25710.1:exon_2
chr01	14550552	14576035	BreakDancer:DELLY:Lumpy	score=99;PE=7:PE=13;SR=0:SU=4	CDS	14571837	14573992	-	LOC_Os01g25710.1:cds_2
chr01	14577186	14577610	BreakDancer:DELLY	score=99;PE=10:PE=12;SR=0	mRNA	14571837	14581150	-	LOC_Os01g25710.1
chr01	14577186	14577610	BreakDancer:DELLY	score=99;PE=10:PE=12;SR=0	exon	14577407	14578697	-	LOC_Os01g25710.1:exon_6
chr01	14577186	14577610	BreakDancer:DELLY	score=99;PE=10:PE=12;SR=0	gene	14571837	14581150	-	LOC_Os01g25710
chr01	14577186	14577610	BreakDancer:DELLY	score=99;PE=10:PE=12;SR=0	five_prime_UTR	14577407	14578697	-	LOC_Os01g25710.1:utr_2
chr01	14577186	14577610	BreakDancer:DELLY	score=99;PE=10:PE=12;SR=0	gene	14571837	14581967	-	LOC_Os01g25720
chr01	14577186	14577610	BreakDancer:DELLY	score=99;PE=10:PE=12;SR=0	mRNA	14576587	14581967	-	LOC_Os01g25720.1
chr01	14577186	14577610	BreakDancer:DELLY	score=99;PE=10:PE=12;SR=0	exon	14576587	14581967	-	LOC_Os01g25720.1:exon_1
chr01	14577186	14577610	BreakDancer:DELLY	score=99;PE=10:PE=12;SR=0	three_prime_UTR	14576587	14579731	-	LOC_Os01g25720.1:utr_1
chr01	14577186	14577610	BreakDancer:DELLY	score=99;PE=10:PE=12;SR=0	mRNA	14576587	14581967	-	LOC_Os01g25720.2
chr01	14577186	14577610	BreakDancer:DELLY	score=99;PE=10:PE=12;SR=0	exon	14576587	14579200	-	LOC_Os01g25720.2:exon_2
chr01	14577186	14577610	BreakDancer:DELLY	score=99;PE=10:PE=12;SR=0	three_prime_UTR	14576587	14579200	-	LOC_Os01g25720.2:utr_1
chr01	14630584	14630741	BreakDancer:Pindel	score=99;PE=18:SR=3;score=6	NA	NA	NA	NA	NA
chr01	14660465	14672602	BreakDancer:DELLY:Lumpy	score=99;PE=7:PE=7;SR=0:SU=4	gene	14663654	14670402	-	LOC_Os01g25860
chr01	14660465	14672602	BreakDancer:DELLY:Lumpy	score=99;PE=7:PE=7;SR=0:SU=4	mRNA	14663654	14670402	-	LOC_Os01g25860.1
chr01	14660465	14672602	BreakDancer:DELLY:Lumpy	score=99;PE=7:PE=7;SR=0:SU=4	exon	14670337	14670402	-	LOC_Os01g25860.1:exon_1
chr01	14660465	14672602	BreakDancer:DELLY:Lumpy	score=99;PE=7:PE=7;SR=0:SU=4	exon	14668480	14669233	-	LOC_Os01g25860.1:exon_2
chr01	14660465	14672602	BreakDancer:DELLY:Lumpy	score=99;PE=7:PE=7;SR=0:SU=4	exon	14663654	14668212	-	LOC_Os01g25860.1:exon_3
chr01	14660465	14672602	BreakDancer:DELLY:Lumpy	score=99;PE=7:PE=7;SR=0:SU=4	CDS	14670337	14670402	-	LOC_Os01g25860.1:cds_1
chr01	14660465	14672602	BreakDancer:DELLY:Lumpy	score=99;PE=7:PE=7;SR=0:SU=4	CDS	14668480	14669233	-	LOC_Os01g25860.1:cds_2
chr01	14660465	14672602	BreakDancer:DELLY:Lumpy	score=99;PE=7:PE=7;SR=0:SU=4	CDS	14663654	14668212	-	LOC_Os01g25860.1:cds_3
chr01	14692033	14698219	BreakDancer:Pindel:DELLY:SVseq2:Lumpy	score=99;PE=24:SR=13;score=56:PE=21;SR=7:SR=5:SU=6	gene	14690814	14692610	+	LOC_Os01g25890
chr01	14692033	14698219	BreakDancer:Pindel:DELLY:SVseq2:Lumpy	score=99;PE=24:SR=13;score=56:PE=21;SR=7:SR=5:SU=6	mRNA	14690814	14692610	+	LOC_Os01g25890.1
chr01	14692033	14698219	BreakDancer:Pindel:DELLY:SVseq2:Lumpy	score=99;PE=24:SR=13;score=56:PE=21;SR=7:SR=5:SU=6	exon	14692051	14692610	+	LOC_Os01g25890.1:exon_2
chr01	14692033	14698219	BreakDancer:Pindel:DELLY:SVseq2:Lumpy	score=99;PE=24:SR=13;score=56:PE=21;SR=7:SR=5:SU=6	CDS	14692051	14692610	+	LOC_Os01g25890.1:cds_2
chr01	14692033	14698219	BreakDancer:Pindel:DELLY:SVseq2:Lumpy	score=99;PE=24:SR=13;score=56:PE=21;SR=7:SR=5:SU=6	gene	14693236	14696370	-	LOC_Os01g25900
chr01	14692033	14698219	BreakDancer:Pindel:DELLY:SVseq2:Lumpy	score=99;PE=24:SR=13;score=56:PE=21;SR=7:SR=5:SU=6	mRNA	14693236	14696370	-	LOC_Os01g25900.1
chr01	14692033	14698219	BreakDancer:Pindel:DELLY:SVseq2:Lumpy	score=99;PE=24:SR=13;score=56:PE=21;SR=7:SR=5:SU=6	exon	14695109	14696370	-	LOC_Os01g25900.1:exon_1
chr01	14692033	14698219	BreakDancer:Pindel:DELLY:SVseq2:Lumpy	score=99;PE=24:SR=13;score=56:PE=21;SR=7:SR=5:SU=6	exon	14693718	14695014	-	LOC_Os01g25900.1:exon_2
chr01	14692033	14698219	BreakDancer:Pindel:DELLY:SVseq2:Lumpy	score=99;PE=24:SR=13;score=56:PE=21;SR=7:SR=5:SU=6	exon	14693236	14693640	-	LOC_Os01g25900.1:exon_3
chr01	14692033	14698219	BreakDancer:Pindel:DELLY:SVseq2:Lumpy	score=99;PE=24:SR=13;score=56:PE=21;SR=7:SR=5:SU=6	CDS	14695109	14696370	-	LOC_Os01g25900.1:cds_1
chr01	14692033	14698219	BreakDancer:Pindel:DELLY:SVseq2:Lumpy	score=99;PE=24:SR=13;score=56:PE=21;SR=7:SR=5:SU=6	CDS	14693718	14695014	-	LOC_Os01g25900.1:cds_2
chr01	14692033	14698219	BreakDancer:Pindel:DELLY:SVseq2:Lumpy	score=99;PE=24:SR=13;score=56:PE=21;SR=7:SR=5:SU=6	CDS	14693236	14693640	-	LOC_Os01g25900.1:cds_3
chr01	14753490	14753981	BreakDancer:DELLY	score=99;PE=7:PE=10;SR=0	gene	14752089	14754630	+	LOC_Os01g26020
chr01	14753490	14753981	BreakDancer:DELLY	score=99;PE=7:PE=10;SR=0	mRNA	14752089	14754630	+	LOC_Os01g26020.1
chr01	14760529	14763032	BreakDancer:DELLY	score=99;PE=12:PE=14;SR=0	gene	14754773	14764507	-	LOC_Os01g26039
chr01	14760529	14763032	BreakDancer:DELLY	score=99;PE=12:PE=14;SR=0	mRNA	14754773	14764507	-	LOC_Os01g26039.1
chr01	14797604	14798219	BreakDancer:Pindel:DELLY:SVseq2:Lumpy	score=99;PE=24:SR=11;score=42:PE=24;SR=6:SR=6:SU=4	NA	NA	NA	NA	NA
chr01	14851124	14852331	BreakDancer:DELLY	score=99;PE=9:PE=12;SR=0	NA	NA	NA	NA	NA
chr01	14852446	14853434	BreakDancer:Pindel:DELLY:Lumpy	score=99;PE=10:SR=4;score=5:PE=9;SR=0:SU=4	NA	NA	NA	NA	NA
chr01	14853696	14856104	BreakDancer:DELLY:Lumpy	score=99;PE=7:PE=7;SR=0:SU=5	gene	14856098	14858270	-	LOC_Os01g26210
chr01	14853696	14856104	BreakDancer:DELLY:Lumpy	score=99;PE=7:PE=7;SR=0:SU=5	mRNA	14856098	14858270	-	LOC_Os01g26210.1
chr01	14853696	14856104	BreakDancer:DELLY:Lumpy	score=99;PE=7:PE=7;SR=0:SU=5	exon	14856098	14856109	-	LOC_Os01g26210.1:exon_4
chr01	14853696	14856104	BreakDancer:DELLY:Lumpy	score=99;PE=7:PE=7;SR=0:SU=5	CDS	14856098	14856109	-	LOC_Os01g26210.1:cds_4
chr01	15172543	15173251	BreakDancer:Pindel:DELLY	score=99;PE=11:SR=3;score=6:PE=12;SR=0	NA	NA	NA	NA	NA
chr01	15187038	15187644	BreakDancer:Pindel:DELLY	score=96;PE=5:SR=7;score=18:PE=7;SR=0	gene	15185076	15188301	-	LOC_Os01g27230
chr01	15187038	15187644	BreakDancer:Pindel:DELLY	score=96;PE=5:SR=7;score=18:PE=7;SR=0	mRNA	15185076	15188301	-	LOC_Os01g27230.1
chr01	15187038	15187644	BreakDancer:Pindel:DELLY	score=96;PE=5:SR=7;score=18:PE=7;SR=0	exon	15186238	15187928	-	LOC_Os01g27230.1:exon_2
chr01	15187038	15187644	BreakDancer:Pindel:DELLY	score=96;PE=5:SR=7;score=18:PE=7;SR=0	five_prime_UTR	15186566	15187928	-	LOC_Os01g27230.1:utr_2
chr01	15211812	15215384	BreakDancer:Pindel:DELLY:SVseq2	score=81;PE=4:SR=5;score=12:PE=6;SR=0:SR=4	NA	NA	NA	NA	NA
chr01	15218226	15222418	BreakDancer:DELLY:Lumpy	score=99;PE=6:PE=9;SR=0:SU=4	gene	15219895	15221670	+	LOC_Os01g27270
chr01	15218226	15222418	BreakDancer:DELLY:Lumpy	score=99;PE=6:PE=9;SR=0:SU=4	mRNA	15219895	15221670	+	LOC_Os01g27270.1
chr01	15218226	15222418	BreakDancer:DELLY:Lumpy	score=99;PE=6:PE=9;SR=0:SU=4	exon	15219895	15220573	+	LOC_Os01g27270.1:exon_1
chr01	15218226	15222418	BreakDancer:DELLY:Lumpy	score=99;PE=6:PE=9;SR=0:SU=4	exon	15221546	15221670	+	LOC_Os01g27270.1:exon_2
chr01	15218226	15222418	BreakDancer:DELLY:Lumpy	score=99;PE=6:PE=9;SR=0:SU=4	CDS	15219895	15220573	+	LOC_Os01g27270.1:cds_1
chr01	15218226	15222418	BreakDancer:DELLY:Lumpy	score=99;PE=6:PE=9;SR=0:SU=4	CDS	15221546	15221670	+	LOC_Os01g27270.1:cds_2
chr01	15210546	15211186	DELLY:Lumpy	PE=15;SR=0:SU=7	NA	NA	NA	NA	NA
chr01	15348562	15352380	BreakDancer:DELLY:CNVnator:Lumpy	score=99;PE=9:PE=10;SR=0:eval1=0.0288579;eval2=2.15838;eval3=174.139;eval4=35088.2:SU=4	gene	15350554	15351568	+	LOC_Os01g27500
chr01	15348562	15352380	BreakDancer:DELLY:CNVnator:Lumpy	score=99;PE=9:PE=10;SR=0:eval1=0.0288579;eval2=2.15838;eval3=174.139;eval4=35088.2:SU=4	mRNA	15350554	15351568	+	LOC_Os01g27500.1
chr01	15348562	15352380	BreakDancer:DELLY:CNVnator:Lumpy	score=99;PE=9:PE=10;SR=0:eval1=0.0288579;eval2=2.15838;eval3=174.139;eval4=35088.2:SU=4	exon	15350554	15350628	+	LOC_Os01g27500.1:exon_1
chr01	15348562	15352380	BreakDancer:DELLY:CNVnator:Lumpy	score=99;PE=9:PE=10;SR=0:eval1=0.0288579;eval2=2.15838;eval3=174.139;eval4=35088.2:SU=4	exon	15350666	15350701	+	LOC_Os01g27500.1:exon_2
chr01	15348562	15352380	BreakDancer:DELLY:CNVnator:Lumpy	score=99;PE=9:PE=10;SR=0:eval1=0.0288579;eval2=2.15838;eval3=174.139;eval4=35088.2:SU=4	exon	15351043	15351133	+	LOC_Os01g27500.1:exon_3
chr01	15348562	15352380	BreakDancer:DELLY:CNVnator:Lumpy	score=99;PE=9:PE=10;SR=0:eval1=0.0288579;eval2=2.15838;eval3=174.139;eval4=35088.2:SU=4	exon	15351369	15351568	+	LOC_Os01g27500.1:exon_4
chr01	15348562	15352380	BreakDancer:DELLY:CNVnator:Lumpy	score=99;PE=9:PE=10;SR=0:eval1=0.0288579;eval2=2.15838;eval3=174.139;eval4=35088.2:SU=4	CDS	15350554	15350628	+	LOC_Os01g27500.1:cds_1
chr01	15348562	15352380	BreakDancer:DELLY:CNVnator:Lumpy	score=99;PE=9:PE=10;SR=0:eval1=0.0288579;eval2=2.15838;eval3=174.139;eval4=35088.2:SU=4	CDS	15350666	15350701	+	LOC_Os01g27500.1:cds_2
chr01	15348562	15352380	BreakDancer:DELLY:CNVnator:Lumpy	score=99;PE=9:PE=10;SR=0:eval1=0.0288579;eval2=2.15838;eval3=174.139;eval4=35088.2:SU=4	CDS	15351043	15351133	+	LOC_Os01g27500.1:cds_3
chr01	15348562	15352380	BreakDancer:DELLY:CNVnator:Lumpy	score=99;PE=9:PE=10;SR=0:eval1=0.0288579;eval2=2.15838;eval3=174.139;eval4=35088.2:SU=4	CDS	15351369	15351568	+	LOC_Os01g27500.1:cds_4
chr01	15360848	15362468	BreakDancer:DELLY	score=89;PE=4:PE=6;SR=0	gene	15361032	15361951	-	LOC_Os01g27530
chr01	15360848	15362468	BreakDancer:DELLY	score=89;PE=4:PE=6;SR=0	mRNA	15361032	15361951	-	LOC_Os01g27530.1
chr01	15360848	15362468	BreakDancer:DELLY	score=89;PE=4:PE=6;SR=0	exon	15361780	15361951	-	LOC_Os01g27530.1:exon_1
chr01	15360848	15362468	BreakDancer:DELLY	score=89;PE=4:PE=6;SR=0	exon	15361032	15361516	-	LOC_Os01g27530.1:exon_2
chr01	15360848	15362468	BreakDancer:DELLY	score=89;PE=4:PE=6;SR=0	CDS	15361780	15361951	-	LOC_Os01g27530.1:cds_1
chr01	15360848	15362468	BreakDancer:DELLY	score=89;PE=4:PE=6;SR=0	CDS	15361032	15361516	-	LOC_Os01g27530.1:cds_2
chr01	15364165	15365834	BreakDancer:DELLY:SVseq2	score=99;PE=12:PE=12;SR=0:SR=3	NA	NA	NA	NA	NA
chr01	15387166	15392192	BreakDancer:Pindel:DELLY:SVseq2	score=99;PE=14:SR=8;score=24:PE=16;SR=0:SR=3	gene	15387453	15388827	-	LOC_Os01g27580
chr01	15387166	15392192	BreakDancer:Pindel:DELLY:SVseq2	score=99;PE=14:SR=8;score=24:PE=16;SR=0:SR=3	mRNA	15387453	15388827	-	LOC_Os01g27580.1
chr01	15387166	15392192	BreakDancer:Pindel:DELLY:SVseq2	score=99;PE=14:SR=8;score=24:PE=16;SR=0:SR=3	exon	15388638	15388827	-	LOC_Os01g27580.1:exon_1
chr01	15387166	15392192	BreakDancer:Pindel:DELLY:SVseq2	score=99;PE=14:SR=8;score=24:PE=16;SR=0:SR=3	exon	15387453	15388216	-	LOC_Os01g27580.1:exon_2
chr01	15387166	15392192	BreakDancer:Pindel:DELLY:SVseq2	score=99;PE=14:SR=8;score=24:PE=16;SR=0:SR=3	CDS	15388638	15388827	-	LOC_Os01g27580.1:cds_1
chr01	15387166	15392192	BreakDancer:Pindel:DELLY:SVseq2	score=99;PE=14:SR=8;score=24:PE=16;SR=0:SR=3	CDS	15387453	15388216	-	LOC_Os01g27580.1:cds_2
chr01	15387166	15392192	BreakDancer:Pindel:DELLY:SVseq2	score=99;PE=14:SR=8;score=24:PE=16;SR=0:SR=3	gene	15389732	15392073	-	LOC_Os01g27590
chr01	15387166	15392192	BreakDancer:Pindel:DELLY:SVseq2	score=99;PE=14:SR=8;score=24:PE=16;SR=0:SR=3	mRNA	15389732	15392073	-	LOC_Os01g27590.1
chr01	15387166	15392192	BreakDancer:Pindel:DELLY:SVseq2	score=99;PE=14:SR=8;score=24:PE=16;SR=0:SR=3	exon	15391506	15392073	-	LOC_Os01g27590.1:exon_1
chr01	15387166	15392192	BreakDancer:Pindel:DELLY:SVseq2	score=99;PE=14:SR=8;score=24:PE=16;SR=0:SR=3	exon	15389732	15391023	-	LOC_Os01g27590.1:exon_2
chr01	15387166	15392192	BreakDancer:Pindel:DELLY:SVseq2	score=99;PE=14:SR=8;score=24:PE=16;SR=0:SR=3	five_prime_UTR	15391832	15392073	-	LOC_Os01g27590.1:utr_2
chr01	15387166	15392192	BreakDancer:Pindel:DELLY:SVseq2	score=99;PE=14:SR=8;score=24:PE=16;SR=0:SR=3	CDS	15391506	15391831	-	LOC_Os01g27590.1:cds_1
chr01	15387166	15392192	BreakDancer:Pindel:DELLY:SVseq2	score=99;PE=14:SR=8;score=24:PE=16;SR=0:SR=3	CDS	15390219	15391023	-	LOC_Os01g27590.1:cds_2
chr01	15387166	15392192	BreakDancer:Pindel:DELLY:SVseq2	score=99;PE=14:SR=8;score=24:PE=16;SR=0:SR=3	three_prime_UTR	15389732	15390218	-	LOC_Os01g27590.1:utr_1
chr01	15392619	15392854	BreakDancer:Pindel	score=99;PE=17:SR=6;score=16	NA	NA	NA	NA	NA
chr01	15413091	15414809	BreakDancer:Pindel:DELLY:CNVnator:Lumpy	score=99;PE=21:SR=6;score=12:PE=21;SR=0:eval1=7.2222e-05;eval2=1.86628e-14;eval3=1;eval4=1:SU=5	gene	15413115	15415791	+	LOC_Os01g27640
chr01	15413091	15414809	BreakDancer:Pindel:DELLY:CNVnator:Lumpy	score=99;PE=21:SR=6;score=12:PE=21;SR=0:eval1=7.2222e-05;eval2=1.86628e-14;eval3=1;eval4=1:SU=5	mRNA	15413115	15415791	+	LOC_Os01g27640.1
chr01	15413091	15414809	BreakDancer:Pindel:DELLY:CNVnator:Lumpy	score=99;PE=21:SR=6;score=12:PE=21;SR=0:eval1=7.2222e-05;eval2=1.86628e-14;eval3=1;eval4=1:SU=5	exon	15413115	15414513	+	LOC_Os01g27640.1:exon_1
chr01	15413091	15414809	BreakDancer:Pindel:DELLY:CNVnator:Lumpy	score=99;PE=21:SR=6;score=12:PE=21;SR=0:eval1=7.2222e-05;eval2=1.86628e-14;eval3=1;eval4=1:SU=5	CDS	15413115	15414513	+	LOC_Os01g27640.1:cds_1
chr01	15425755	15426150	DELLY:Lumpy	PE=5;SR=0:SU=4	NA	NA	NA	NA	NA
chr01	15443843	15444606	BreakDancer:Pindel:DELLY	score=99;PE=10:SR=4;score=8:PE=13;SR=0	NA	NA	NA	NA	NA
chr01	15467929	15468171	BreakDancer:Pindel	score=99;PE=9:SR=5;score=12	NA	NA	NA	NA	NA
chr01	15480883	15481098	BreakDancer:Pindel	score=99;PE=24:SR=8;score=24	gene	15479968	15493549	+	LOC_Os01g27750
chr01	15480883	15481098	BreakDancer:Pindel	score=99;PE=24:SR=8;score=24	mRNA	15479968	15493549	+	LOC_Os01g27750.1
chr01	15498555	15498900	BreakDancer:Pindel:DELLY	score=99;PE=14:SR=4;score=5:PE=15;SR=0	NA	NA	NA	NA	NA
chr01	15506307	15506410	BreakDancer:Pindel	score=99;PE=6:SR=3;score=4	gene	15503196	15511672	+	LOC_Os01g27770
chr01	15506307	15506410	BreakDancer:Pindel	score=99;PE=6:SR=3;score=4	mRNA	15503196	15511672	+	LOC_Os01g27770.1
chr01	15516780	15529261	BreakDancer:DELLY:CNVnator	score=84;PE=4:PE=4;SR=0:eval1=1.29571e-11;eval2=1.02755e-08;eval3=1.97318e-10;eval4=3.67205e-06	gene	15515054	15523392	+	LOC_Os01g27790
chr01	15516780	15529261	BreakDancer:DELLY:CNVnator	score=84;PE=4:PE=4;SR=0:eval1=1.29571e-11;eval2=1.02755e-08;eval3=1.97318e-10;eval4=3.67205e-06	mRNA	15515054	15523392	+	LOC_Os01g27790.1
chr01	15516780	15529261	BreakDancer:DELLY:CNVnator	score=84;PE=4:PE=4;SR=0:eval1=1.29571e-11;eval2=1.02755e-08;eval3=1.97318e-10;eval4=3.67205e-06	exon	15518067	15519454	+	LOC_Os01g27790.1:exon_2
chr01	15516780	15529261	BreakDancer:DELLY:CNVnator	score=84;PE=4:PE=4;SR=0:eval1=1.29571e-11;eval2=1.02755e-08;eval3=1.97318e-10;eval4=3.67205e-06	exon	15519499	15520135	+	LOC_Os01g27790.1:exon_3
chr01	15516780	15529261	BreakDancer:DELLY:CNVnator	score=84;PE=4:PE=4;SR=0:eval1=1.29571e-11;eval2=1.02755e-08;eval3=1.97318e-10;eval4=3.67205e-06	exon	15520208	15520426	+	LOC_Os01g27790.1:exon_4
chr01	15516780	15529261	BreakDancer:DELLY:CNVnator	score=84;PE=4:PE=4;SR=0:eval1=1.29571e-11;eval2=1.02755e-08;eval3=1.97318e-10;eval4=3.67205e-06	exon	15520472	15521251	+	LOC_Os01g27790.1:exon_5
chr01	15516780	15529261	BreakDancer:DELLY:CNVnator	score=84;PE=4:PE=4;SR=0:eval1=1.29571e-11;eval2=1.02755e-08;eval3=1.97318e-10;eval4=3.67205e-06	exon	15521430	15521969	+	LOC_Os01g27790.1:exon_6
chr01	15516780	15529261	BreakDancer:DELLY:CNVnator	score=84;PE=4:PE=4;SR=0:eval1=1.29571e-11;eval2=1.02755e-08;eval3=1.97318e-10;eval4=3.67205e-06	exon	15522003	15522191	+	LOC_Os01g27790.1:exon_7
chr01	15516780	15529261	BreakDancer:DELLY:CNVnator	score=84;PE=4:PE=4;SR=0:eval1=1.29571e-11;eval2=1.02755e-08;eval3=1.97318e-10;eval4=3.67205e-06	exon	15522246	15523074	+	LOC_Os01g27790.1:exon_8
chr01	15516780	15529261	BreakDancer:DELLY:CNVnator	score=84;PE=4:PE=4;SR=0:eval1=1.29571e-11;eval2=1.02755e-08;eval3=1.97318e-10;eval4=3.67205e-06	exon	15523109	15523392	+	LOC_Os01g27790.1:exon_9
chr01	15516780	15529261	BreakDancer:DELLY:CNVnator	score=84;PE=4:PE=4;SR=0:eval1=1.29571e-11;eval2=1.02755e-08;eval3=1.97318e-10;eval4=3.67205e-06	CDS	15518067	15519454	+	LOC_Os01g27790.1:cds_2
chr01	15516780	15529261	BreakDancer:DELLY:CNVnator	score=84;PE=4:PE=4;SR=0:eval1=1.29571e-11;eval2=1.02755e-08;eval3=1.97318e-10;eval4=3.67205e-06	CDS	15519499	15520135	+	LOC_Os01g27790.1:cds_3
chr01	15516780	15529261	BreakDancer:DELLY:CNVnator	score=84;PE=4:PE=4;SR=0:eval1=1.29571e-11;eval2=1.02755e-08;eval3=1.97318e-10;eval4=3.67205e-06	CDS	15520208	15520426	+	LOC_Os01g27790.1:cds_4
chr01	15516780	15529261	BreakDancer:DELLY:CNVnator	score=84;PE=4:PE=4;SR=0:eval1=1.29571e-11;eval2=1.02755e-08;eval3=1.97318e-10;eval4=3.67205e-06	CDS	15520472	15521251	+	LOC_Os01g27790.1:cds_5
chr01	15516780	15529261	BreakDancer:DELLY:CNVnator	score=84;PE=4:PE=4;SR=0:eval1=1.29571e-11;eval2=1.02755e-08;eval3=1.97318e-10;eval4=3.67205e-06	CDS	15521430	15521969	+	LOC_Os01g27790.1:cds_6
chr01	15516780	15529261	BreakDancer:DELLY:CNVnator	score=84;PE=4:PE=4;SR=0:eval1=1.29571e-11;eval2=1.02755e-08;eval3=1.97318e-10;eval4=3.67205e-06	CDS	15522003	15522191	+	LOC_Os01g27790.1:cds_7
chr01	15516780	15529261	BreakDancer:DELLY:CNVnator	score=84;PE=4:PE=4;SR=0:eval1=1.29571e-11;eval2=1.02755e-08;eval3=1.97318e-10;eval4=3.67205e-06	CDS	15522246	15523074	+	LOC_Os01g27790.1:cds_8
chr01	15516780	15529261	BreakDancer:DELLY:CNVnator	score=84;PE=4:PE=4;SR=0:eval1=1.29571e-11;eval2=1.02755e-08;eval3=1.97318e-10;eval4=3.67205e-06	CDS	15523109	15523392	+	LOC_Os01g27790.1:cds_9
chr01	15516780	15529261	BreakDancer:DELLY:CNVnator	score=84;PE=4:PE=4;SR=0:eval1=1.29571e-11;eval2=1.02755e-08;eval3=1.97318e-10;eval4=3.67205e-06	gene	15524064	15527606	-	LOC_Os01g27800
chr01	15516780	15529261	BreakDancer:DELLY:CNVnator	score=84;PE=4:PE=4;SR=0:eval1=1.29571e-11;eval2=1.02755e-08;eval3=1.97318e-10;eval4=3.67205e-06	mRNA	15524064	15527606	-	LOC_Os01g27800.1
chr01	15516780	15529261	BreakDancer:DELLY:CNVnator	score=84;PE=4:PE=4;SR=0:eval1=1.29571e-11;eval2=1.02755e-08;eval3=1.97318e-10;eval4=3.67205e-06	exon	15526708	15527606	-	LOC_Os01g27800.1:exon_1
chr01	15516780	15529261	BreakDancer:DELLY:CNVnator	score=84;PE=4:PE=4;SR=0:eval1=1.29571e-11;eval2=1.02755e-08;eval3=1.97318e-10;eval4=3.67205e-06	exon	15524567	15526152	-	LOC_Os01g27800.1:exon_2
chr01	15516780	15529261	BreakDancer:DELLY:CNVnator	score=84;PE=4:PE=4;SR=0:eval1=1.29571e-11;eval2=1.02755e-08;eval3=1.97318e-10;eval4=3.67205e-06	exon	15524064	15524176	-	LOC_Os01g27800.1:exon_3
chr01	15516780	15529261	BreakDancer:DELLY:CNVnator	score=84;PE=4:PE=4;SR=0:eval1=1.29571e-11;eval2=1.02755e-08;eval3=1.97318e-10;eval4=3.67205e-06	CDS	15526708	15527606	-	LOC_Os01g27800.1:cds_1
chr01	15516780	15529261	BreakDancer:DELLY:CNVnator	score=84;PE=4:PE=4;SR=0:eval1=1.29571e-11;eval2=1.02755e-08;eval3=1.97318e-10;eval4=3.67205e-06	CDS	15524567	15526152	-	LOC_Os01g27800.1:cds_2
chr01	15516780	15529261	BreakDancer:DELLY:CNVnator	score=84;PE=4:PE=4;SR=0:eval1=1.29571e-11;eval2=1.02755e-08;eval3=1.97318e-10;eval4=3.67205e-06	CDS	15524064	15524176	-	LOC_Os01g27800.1:cds_3
chr01	15576697	15581719	BreakDancer:Pindel:DELLY	score=99;PE=9:SR=5;score=12:PE=12;SR=0	NA	NA	NA	NA	NA
chr01	15637290	15639014	BreakDancer:Lumpy	score=90;PE=4:SU=5	gene	15637664	15637966	+	LOC_Os01g27970
chr01	15637290	15639014	BreakDancer:Lumpy	score=90;PE=4:SU=5	mRNA	15637664	15637966	+	LOC_Os01g27970.1
chr01	15637290	15639014	BreakDancer:Lumpy	score=90;PE=4:SU=5	exon	15637664	15637966	+	LOC_Os01g27970.1:exon_1
chr01	15637290	15639014	BreakDancer:Lumpy	score=90;PE=4:SU=5	CDS	15637664	15637966	+	LOC_Os01g27970.1:cds_1
chr01	15680288	15687374	BreakDancer:DELLY	score=90;PE=4:PE=4;SR=0	gene	15681231	15686522	-	LOC_Os01g28040
chr01	15680288	15687374	BreakDancer:DELLY	score=90;PE=4:PE=4;SR=0	mRNA	15681231	15686522	-	LOC_Os01g28040.1
chr01	15680288	15687374	BreakDancer:DELLY	score=90;PE=4:PE=4;SR=0	exon	15686274	15686522	-	LOC_Os01g28040.1:exon_1
chr01	15680288	15687374	BreakDancer:DELLY	score=90;PE=4:PE=4;SR=0	exon	15683091	15683138	-	LOC_Os01g28040.1:exon_2
chr01	15680288	15687374	BreakDancer:DELLY	score=90;PE=4:PE=4;SR=0	exon	15682505	15682963	-	LOC_Os01g28040.1:exon_3
chr01	15680288	15687374	BreakDancer:DELLY	score=90;PE=4:PE=4;SR=0	exon	15681916	15682093	-	LOC_Os01g28040.1:exon_4
chr01	15680288	15687374	BreakDancer:DELLY	score=90;PE=4:PE=4;SR=0	exon	15681231	15681688	-	LOC_Os01g28040.1:exon_5
chr01	15680288	15687374	BreakDancer:DELLY	score=90;PE=4:PE=4;SR=0	CDS	15686274	15686522	-	LOC_Os01g28040.1:cds_1
chr01	15680288	15687374	BreakDancer:DELLY	score=90;PE=4:PE=4;SR=0	CDS	15683091	15683138	-	LOC_Os01g28040.1:cds_2
chr01	15680288	15687374	BreakDancer:DELLY	score=90;PE=4:PE=4;SR=0	CDS	15682505	15682963	-	LOC_Os01g28040.1:cds_3
chr01	15680288	15687374	BreakDancer:DELLY	score=90;PE=4:PE=4;SR=0	CDS	15681916	15682093	-	LOC_Os01g28040.1:cds_4
chr01	15680288	15687374	BreakDancer:DELLY	score=90;PE=4:PE=4;SR=0	CDS	15681231	15681688	-	LOC_Os01g28040.1:cds_5
chr01	15695141	15714205	BreakDancer:DELLY:Lumpy	score=99;PE=7:PE=15;SR=0:SU=7	gene	15704120	15710630	+	LOC_Os01g28060
chr01	15695141	15714205	BreakDancer:DELLY:Lumpy	score=99;PE=7:PE=15;SR=0:SU=7	mRNA	15704120	15710630	+	LOC_Os01g28060.1
chr01	15695141	15714205	BreakDancer:DELLY:Lumpy	score=99;PE=7:PE=15;SR=0:SU=7	exon	15704120	15704275	+	LOC_Os01g28060.1:exon_1
chr01	15695141	15714205	BreakDancer:DELLY:Lumpy	score=99;PE=7:PE=15;SR=0:SU=7	exon	15705750	15706323	+	LOC_Os01g28060.1:exon_2
chr01	15695141	15714205	BreakDancer:DELLY:Lumpy	score=99;PE=7:PE=15;SR=0:SU=7	exon	15706499	15707122	+	LOC_Os01g28060.1:exon_3
chr01	15695141	15714205	BreakDancer:DELLY:Lumpy	score=99;PE=7:PE=15;SR=0:SU=7	exon	15707204	15708203	+	LOC_Os01g28060.1:exon_4
chr01	15695141	15714205	BreakDancer:DELLY:Lumpy	score=99;PE=7:PE=15;SR=0:SU=7	exon	15708285	15708630	+	LOC_Os01g28060.1:exon_5
chr01	15695141	15714205	BreakDancer:DELLY:Lumpy	score=99;PE=7:PE=15;SR=0:SU=7	exon	15710172	15710630	+	LOC_Os01g28060.1:exon_6
chr01	15695141	15714205	BreakDancer:DELLY:Lumpy	score=99;PE=7:PE=15;SR=0:SU=7	CDS	15704120	15704275	+	LOC_Os01g28060.1:cds_1
chr01	15695141	15714205	BreakDancer:DELLY:Lumpy	score=99;PE=7:PE=15;SR=0:SU=7	CDS	15705750	15706323	+	LOC_Os01g28060.1:cds_2
chr01	15695141	15714205	BreakDancer:DELLY:Lumpy	score=99;PE=7:PE=15;SR=0:SU=7	CDS	15706499	15707122	+	LOC_Os01g28060.1:cds_3
chr01	15695141	15714205	BreakDancer:DELLY:Lumpy	score=99;PE=7:PE=15;SR=0:SU=7	CDS	15707204	15708203	+	LOC_Os01g28060.1:cds_4
chr01	15695141	15714205	BreakDancer:DELLY:Lumpy	score=99;PE=7:PE=15;SR=0:SU=7	CDS	15708285	15708630	+	LOC_Os01g28060.1:cds_5
chr01	15695141	15714205	BreakDancer:DELLY:Lumpy	score=99;PE=7:PE=15;SR=0:SU=7	CDS	15710172	15710630	+	LOC_Os01g28060.1:cds_6
chr01	15695141	15714205	BreakDancer:DELLY:Lumpy	score=99;PE=7:PE=15;SR=0:SU=7	gene	15711152	15712449	+	LOC_Os01g28070
chr01	15695141	15714205	BreakDancer:DELLY:Lumpy	score=99;PE=7:PE=15;SR=0:SU=7	mRNA	15711152	15712449	+	LOC_Os01g28070.1
chr01	15695141	15714205	BreakDancer:DELLY:Lumpy	score=99;PE=7:PE=15;SR=0:SU=7	exon	15711152	15711554	+	LOC_Os01g28070.1:exon_1
chr01	15695141	15714205	BreakDancer:DELLY:Lumpy	score=99;PE=7:PE=15;SR=0:SU=7	exon	15711625	15711824	+	LOC_Os01g28070.1:exon_2
chr01	15695141	15714205	BreakDancer:DELLY:Lumpy	score=99;PE=7:PE=15;SR=0:SU=7	exon	15711900	15712183	+	LOC_Os01g28070.1:exon_3
chr01	15695141	15714205	BreakDancer:DELLY:Lumpy	score=99;PE=7:PE=15;SR=0:SU=7	exon	15712272	15712449	+	LOC_Os01g28070.1:exon_4
chr01	15695141	15714205	BreakDancer:DELLY:Lumpy	score=99;PE=7:PE=15;SR=0:SU=7	CDS	15711152	15711554	+	LOC_Os01g28070.1:cds_1
chr01	15695141	15714205	BreakDancer:DELLY:Lumpy	score=99;PE=7:PE=15;SR=0:SU=7	CDS	15711625	15711824	+	LOC_Os01g28070.1:cds_2
chr01	15695141	15714205	BreakDancer:DELLY:Lumpy	score=99;PE=7:PE=15;SR=0:SU=7	CDS	15711900	15712183	+	LOC_Os01g28070.1:cds_3
chr01	15695141	15714205	BreakDancer:DELLY:Lumpy	score=99;PE=7:PE=15;SR=0:SU=7	CDS	15712272	15712449	+	LOC_Os01g28070.1:cds_4
chr01	15695141	15714205	BreakDancer:DELLY:Lumpy	score=99;PE=7:PE=15;SR=0:SU=7	gene	15714116	15714559	-	LOC_Os01g28080
chr01	15695141	15714205	BreakDancer:DELLY:Lumpy	score=99;PE=7:PE=15;SR=0:SU=7	mRNA	15714116	15714559	-	LOC_Os01g28080.1
chr01	15695141	15714205	BreakDancer:DELLY:Lumpy	score=99;PE=7:PE=15;SR=0:SU=7	exon	15714116	15714559	-	LOC_Os01g28080.1:exon_1
chr01	15695141	15714205	BreakDancer:DELLY:Lumpy	score=99;PE=7:PE=15;SR=0:SU=7	CDS	15714116	15714559	-	LOC_Os01g28080.1:cds_1
chr01	15734790	15735158	BreakDancer:DELLY	score=99;PE=11:PE=13;SR=0	NA	NA	NA	NA	NA
chr01	15782873	15805954	BreakDancer:Pindel:DELLY:SVseq2:Lumpy	score=99;PE=14:SR=8;score=21:PE=14;SR=6:SR=4:SU=8	gene	15781931	15783015	+	LOC_Os01g28160
chr01	15782873	15805954	BreakDancer:Pindel:DELLY:SVseq2:Lumpy	score=99;PE=14:SR=8;score=21:PE=14;SR=6:SR=4:SU=8	mRNA	15781931	15783015	+	LOC_Os01g28160.1
chr01	15782873	15805954	BreakDancer:Pindel:DELLY:SVseq2:Lumpy	score=99;PE=14:SR=8;score=21:PE=14;SR=6:SR=4:SU=8	exon	15782966	15783015	+	LOC_Os01g28160.1:exon_2
chr01	15782873	15805954	BreakDancer:Pindel:DELLY:SVseq2:Lumpy	score=99;PE=14:SR=8;score=21:PE=14;SR=6:SR=4:SU=8	CDS	15782966	15783015	+	LOC_Os01g28160.1:cds_2
chr01	15782873	15805954	BreakDancer:Pindel:DELLY:SVseq2:Lumpy	score=99;PE=14:SR=8;score=21:PE=14;SR=6:SR=4:SU=8	gene	15786552	15790904	+	LOC_Os01g28170
chr01	15782873	15805954	BreakDancer:Pindel:DELLY:SVseq2:Lumpy	score=99;PE=14:SR=8;score=21:PE=14;SR=6:SR=4:SU=8	mRNA	15786552	15790904	+	LOC_Os01g28170.1
chr01	15782873	15805954	BreakDancer:Pindel:DELLY:SVseq2:Lumpy	score=99;PE=14:SR=8;score=21:PE=14;SR=6:SR=4:SU=8	exon	15786552	15786667	+	LOC_Os01g28170.1:exon_1
chr01	15782873	15805954	BreakDancer:Pindel:DELLY:SVseq2:Lumpy	score=99;PE=14:SR=8;score=21:PE=14;SR=6:SR=4:SU=8	exon	15787755	15788608	+	LOC_Os01g28170.1:exon_2
chr01	15782873	15805954	BreakDancer:Pindel:DELLY:SVseq2:Lumpy	score=99;PE=14:SR=8;score=21:PE=14;SR=6:SR=4:SU=8	exon	15788749	15790904	+	LOC_Os01g28170.1:exon_3
chr01	15782873	15805954	BreakDancer:Pindel:DELLY:SVseq2:Lumpy	score=99;PE=14:SR=8;score=21:PE=14;SR=6:SR=4:SU=8	CDS	15786552	15786667	+	LOC_Os01g28170.1:cds_1
chr01	15782873	15805954	BreakDancer:Pindel:DELLY:SVseq2:Lumpy	score=99;PE=14:SR=8;score=21:PE=14;SR=6:SR=4:SU=8	CDS	15787755	15788608	+	LOC_Os01g28170.1:cds_2
chr01	15782873	15805954	BreakDancer:Pindel:DELLY:SVseq2:Lumpy	score=99;PE=14:SR=8;score=21:PE=14;SR=6:SR=4:SU=8	CDS	15788749	15790904	+	LOC_Os01g28170.1:cds_3
chr01	15782873	15805954	BreakDancer:Pindel:DELLY:SVseq2:Lumpy	score=99;PE=14:SR=8;score=21:PE=14;SR=6:SR=4:SU=8	gene	15792294	15797086	+	LOC_Os01g28184
chr01	15782873	15805954	BreakDancer:Pindel:DELLY:SVseq2:Lumpy	score=99;PE=14:SR=8;score=21:PE=14;SR=6:SR=4:SU=8	mRNA	15792294	15797086	+	LOC_Os01g28184.1
chr01	15782873	15805954	BreakDancer:Pindel:DELLY:SVseq2:Lumpy	score=99;PE=14:SR=8;score=21:PE=14;SR=6:SR=4:SU=8	exon	15792294	15792728	+	LOC_Os01g28184.1:exon_1
chr01	15782873	15805954	BreakDancer:Pindel:DELLY:SVseq2:Lumpy	score=99;PE=14:SR=8;score=21:PE=14;SR=6:SR=4:SU=8	exon	15793388	15794809	+	LOC_Os01g28184.1:exon_2
chr01	15782873	15805954	BreakDancer:Pindel:DELLY:SVseq2:Lumpy	score=99;PE=14:SR=8;score=21:PE=14;SR=6:SR=4:SU=8	exon	15794884	15795025	+	LOC_Os01g28184.1:exon_3
chr01	15782873	15805954	BreakDancer:Pindel:DELLY:SVseq2:Lumpy	score=99;PE=14:SR=8;score=21:PE=14;SR=6:SR=4:SU=8	exon	15795185	15795887	+	LOC_Os01g28184.1:exon_4
chr01	15782873	15805954	BreakDancer:Pindel:DELLY:SVseq2:Lumpy	score=99;PE=14:SR=8;score=21:PE=14;SR=6:SR=4:SU=8	exon	15796093	15796264	+	LOC_Os01g28184.1:exon_5
[truncated: 39,131 more rows]
